# Supplementary material
Source: HighWire-hosted journal article supplement (https://www.jpn.ca/highwire/filestream/90756/field_highwire_adjunct_files/0/JPN-220226-at-1.pdf)
Supplement: JPN-220226-at-1.pdf [file JPN-220226-at-1.pdf]

Appendix 1 to Smith R, Lavalley CA, Taylor S, et al. Elevated decision uncertainty and reduced avoidance drives in depression, anxiety and substance use disorders during approach–avoidance conflict: a replication study. *J Psychiatry Neurosci* 2023. doi: 10.1503/jpn.220226. Copyright © 2023 The Author(s) or their employer(s). To receive this resource in an accessible format, please contact us at cmajgroup@cmaj.ca. Online appendices are unedited and posted as supplied by the authors.

## Supplementary Materials

### Approach-Avoidance Conflict Task Description

The AAC task (**Figure 1**; <sup>1,2</sup>) is described more extensively in our prior article. A runway was shown on each trial with a picture of an avatar in a starting position above the runway. Pictures were also shown on each side of the runway, indicating the types of stimuli that could be presented at the end of the trial. Specifically, a sun or cloud represented potential positive or negative affective stimuli, respectively; while the height of red fill in a rectangle signified the number of points that would be received in conjunction. On each trial, participants could press the left or right arrow keys to move the avatar from its starting position to any other position (9 possible locations) on the runway, and they were asked to choose one ending position on each trial. They were told that each ending position corresponded to a specific probability of observing different stimuli at the end of the trial. These stimuli included a positive or negative affective image-sound combination (indicated by the sun or cloud, respectively), and a certain level of reward points (indicated by the height of red fill in the rectangle). The ending position of the avatar determined the probability of each of these outcomes occurring. Before starting the task, participants were told the specific probabilities of observing each stimulus for each runway position, and that these probabilities were stable across the task. From left to right on the runway, the probabilities = [.9/.1, .8/.2, .7/.3, .6/.4, .5/.5, .4/.6, .3/.7, .2/.8, .1/.9], reflecting the probability of observing the stimuli associated with the left/right end of the runway. The starting position of the avatar (middle, left end, or right end) was counterbalanced across trials (for each trial type; see below) to control for its potential influence on the participants' choice. Thus, there was no learning in this task, and no measure of better/worse performance; participants simply indicated their preferred location on the runway (based on the probabilities of each outcome) on each trial.

The affective image-sound combinations were gathered from the International Affective Picture System [IAPS] <sup>3</sup>, International Affective Digitized Sounds [IADS] <sup>4</sup>, and other freely available audio files (see further description in previous reports using this task; <sup>1,2</sup>). The “reward” included 0, 2, 4, or 6 points presented along with a trumpet sound. There were five trial types (see **Figure 1**), which were indicated to participants by the images shown on each side of the runway on each trial. Each trial type was named in reference to the behavioral motivation presumably elicited by the negative/positive affective stimuli and/or the reward points:

- (1)** ‘Avoid-threat’ (AV), in which 0 points were offered for both possible stimulus outcomes and thus, the only explicit motivation was to avoid the negative affective stimulus.
- (2)** ‘Approach-reward’ (APP), in which 2 versus 0 points were offered, each with positive affective stimuli. For this condition, the only explicit motivation was to approach the rewarded outcome.
- (3)-(5)** Three levels of ‘Conflict’ in which the negative affective stimulus was presented in addition to winning either 2 (CONF2), 4 (CONF4), or 6 (CONF6) points, while 0 points were offered for the other possible outcome, in which a positive affective stimulus would be presented.

Appendix 1 to Smith R, Lavalley CA, Taylor S, et al. Elevated decision uncertainty and reduced avoidance drives in depression, anxiety and substance use disorders during approach–avoidance conflict: a replication study. *J Psychiatry Neurosci* 2023. doi: 10.1503/jpn.220226. Copyright © 2023 The Author(s) or their employer(s). To receive this resource in an accessible format, please contact us at cmajgroup@cmaj.ca. Online appendices are unedited and posted as supplied by the authors.

The task consisted of a total of 60 trials, with 12 of each of the five trial types. After task completion, a screen appeared displaying total points received and an award ribbon. As in previous administrations of the task<sup>1,5</sup>, points did not correspond to monetary reward. Descriptive behavioral variables consisted of average chosen runway position, within-subject standard deviation in chosen runway position, and response times (RTs; i.e., time to initial button press) during each trial.

After completing all trials, participants filled out a short Likert scale questionnaire about their experiences/behaviors during the task, which is described further below.

### **Examples of Likelihood Matrices in Computational Model of the Approach-Avoidance Conflict Task**

In these matrices, columns (states) from left to right indicate the starting state followed by possible final position states 1 through 9. Rows from top to bottom indicate the possible observations in modality #3 (outcome stimuli). This includes the starting observation (“no stimulus”), followed by observations of: unpleasant stimuli, pleasant stimuli, pleasant stimuli + 2 points, unpleasant stimuli + 2 points, unpleasant stimuli + 4 points, and unpleasant stimuli + 6 points.

$$p(o_{\tau}^{stimuli} | s_{\tau}^{position}, s_{\tau}^{trial\ type=AV}) =$$

$$\begin{bmatrix} 1 & 0 & 0 & 0 & 0 & 0 & 0 & 0 & 0 & 0 \\ 0 & .9 & .8 & .7 & .6 & .5 & .4 & .3 & .2 & .1 \\ 0 & .1 & .2 & .3 & .4 & .5 & .6 & .7 & .8 & .9 \\ 0 & 0 & 0 & 0 & 0 & 0 & 0 & 0 & 0 & 0 \\ 0 & 0 & 0 & 0 & 0 & 0 & 0 & 0 & 0 & 0 \\ 0 & 0 & 0 & 0 & 0 & 0 & 0 & 0 & 0 & 0 \\ 0 & 0 & 0 & 0 & 0 & 0 & 0 & 0 & 0 & 0 \end{bmatrix}$$

$$p(o_{\tau}^{stimuli} | s_{\tau}^{position}, s_{\tau}^{trial\ type=CONF2}) =$$

$$\begin{bmatrix} 1 & 0 & 0 & 0 & 0 & 0 & 0 & 0 & 0 & 0 \\ 0 & 0 & 0 & 0 & 0 & 0 & 0 & 0 & 0 & 0 \\ 0 & .9 & .8 & .7 & .6 & .5 & .4 & .3 & .2 & .1 \\ 0 & 0 & 0 & 0 & 0 & 0 & 0 & 0 & 0 & 0 \\ 0 & .1 & .2 & .3 & .4 & .5 & .6 & .7 & .8 & .9 \\ 0 & 0 & 0 & 0 & 0 & 0 & 0 & 0 & 0 & 0 \\ 0 & 0 & 0 & 0 & 0 & 0 & 0 & 0 & 0 & 0 \end{bmatrix}$$

Matrices for other trial types were equivalently constructed.

### **Comparison between previous and current samples**

To assess equivalence between the sample in our previous report<sup>6</sup> and the current sample, we conducted two-sample t-tests comparing each respective diagnostic group between samples on

Appendix 1 to Smith R, Lavalley CA, Taylor S, et al. Elevated decision uncertainty and reduced avoidance drives in depression, anxiety and substance use disorders during approach–avoidance conflict: a replication study. *J Psychiatry Neurosci* 2023. doi: 10.1503/jpn.220226. Copyright © 2023 The Author(s) or their employer(s). To receive this resource in an accessible format, please contact us at [cmajgroup@cmaj.ca](mailto:cmajgroup@cmaj.ca). Online appendices are unedited and posted as supplied by the authors.

demographic, symptom, and computational measures. No significant differences were observed in the two HC samples. The previous DEP/ANX sample was older ( $t(466) = 2.14, p = .03, d = .20$ ;  $M = 35.89$  [SD = 11.30] vs.  $M = 33.74$  [SD = 10.17]), had higher DAST scores ( $t(466) = 2.27, p = .02, d = .21$ ;  $M = 0.67$  [SD = 1.41] vs.  $M = 0.41$  [SD = 0.95]), and higher DU values ( $t(466) = 2.90, p = .004, d = .27$ ;  $M = 1.21$  [SD = 0.90] vs.  $M = 0.95$  [SD = 1.02]). The previous SUD sample had higher WRAT scores ( $t(81) = 2.30, p = .02, d = .27$ ;  $M = 58.49$  [SD = 5.65] vs.  $M = 56.79$  [SD = 6.78]), and higher DU values ( $t(332) = 2.58, p = .004, d = .28$ ;  $M = 1.46$  [SD = 0.89] vs.  $M = 1.19$  [SD = 1.01]).

### **Relationship between model parameters and demographic variables**

The EC parameter was positively correlated with WRAT scores ( $r = .22, p < .001$ ) and age ( $r = .09, p = .04$ ); it did not differ by sex. The  $\beta$  parameter was positively correlated with age ( $r = .25, p < .001$ ) and negatively correlated with WRAT scores ( $r = -.22, p < .001$ ); it did not differ by sex.

### **Relationship between model parameters and symptoms**

As in our prior study, we performed post-hoc within-group Pearson correlations between model parameters and symptom severity measures available within the T1000 dataset, including the DAST, PHQ-9, and OASIS, as well as scales from the Patient Reported Outcomes Measurement Information System (PROMIS) assessing depression and anxiety<sup>7</sup> and the Anxiety Sensitivity Index (ASI)<sup>8</sup>. Consistent with our prior results, we found no significant associations, with the exception of a positive association between DU and OASIS ( $r = .18, p = .009$ ) and PROMIS anxiety ( $r = .15, p = .03$ ) scores within the DEP/ANX group. These results should be treated with caution, however, since they were not found in our prior report.

### **Comparison of parameters in depression with vs. without co-morbid anxiety**

To explore whether any differences might be present between those with depression that did vs. did not have co-morbid anxiety, exploratory (non-pre-registered) t-tests were carried out assessing potential group differences on all study variables. No significant differences were found for any study variable, with the exception of RTs in the APP condition of the AAC task ( $t(194) = -2.08, p = 0.04, d = .32$ ), indicating slower RTs in those without co-morbid anxiety.

### **Follow-up analyses of model parameters separated by sex**

When redoing the ANOVAs above separated by sex, the same pattern emerged as in our previous study. Namely, the pattern of group differences in EC remained significant in females ( $F(2,320) = 32.98, p < .001$ ) but not in males ( $F(2,154) = 0.65, p = .52$ ), and the pattern of group differences in DU remained significant in males ( $F(2,154) = 3.63, p = .03$ ) but not in females ( $F(2,320) = 0.91, p = .40$ ). In females, post-hoc t-tests showed that all three groups were significantly different in EC values (SUDs < DEP/ANX:  $t(262) = 6.32, p < .001, d = 0.79$ ; DEP/ANX < HCs:  $t(214) = 2.64, p = .009, d = 0.40$ ; SUDs < HCs:  $t(164) = 8.07, p < .001, d = 1.31$ ). In males, post-hoc t-tests showed that SUDs had significantly greater DU values than both other groups (SUDs > DEP/ANX:  $t(117) = 2.10, p = .038, d = 0.39$ ; SUDs > HCs:  $t(104) = 2.43, p = .02, d = 0.49$ ).

### **Secondary analyses of descriptive measures**

Appendix 1 to Smith R, Lavalley CA, Taylor S, et al. Elevated decision uncertainty and reduced avoidance drives in depression, anxiety and substance use disorders during approach–avoidance conflict: a replication study. *J Psychiatry Neurosci* 2023. doi: 10.1503/jpn.220226. Copyright © 2023 The Author(s) or their employer(s). To receive this resource in an accessible format, please contact us at [cmajgroup@cmaj.ca](mailto:cmajgroup@cmaj.ca). Online appendices are unedited and posted as supplied by the authors.

Descriptive statistics for all model-free measures, as well as their correlations with model parameters, are provided in **Tables S1-S4** (see **Figures S1-S3**). These results were largely consistent with those found in our previous paper.

#### *Average chosen runway position*

Analyses revealed significant group differences in chosen runway position for the AV condition, and all three conflict conditions, when analyzed separately – indicating less avoidance in SUDs than HCs in all cases ( $ps < .001$ , when accounting for covariates; see **Table S5**). DEP/ANX also showed less avoidance than HCs in all three conflict conditions (CONF2:  $t(471) = -1.99$ ,  $p = 0.047$ ; CONF4:  $t(471) = -2.06$ ,  $p = 0.040$ ; CONF6:  $t(471) = -2.20$ ,  $p = 0.029$ ). For CONF2 and CONF4, there was an interaction between sex and group ( $F(2, 471) = 4.48$ ,  $p = 0.012$ ;  $F(2, 471) = 3.44$ ,  $p = 0.033$ ), indicating that all three groups were significantly different in females (HCs < DEP/ANX < SUDs), but not in males. These results replicated our previous findings in the AV condition; however, our prior report did not find significant group differences in the conflict conditions as found here. When including only those participants with WRAT Reading scores, and adding possible main effects and interactions with WRAT Reading into the ANCOVA model above, each of the above group effects remained significant (see **Supplementary Results 2**).

#### *Standard deviation in chosen runway position*

As found in our prior report, ANOVAs revealed a group difference in runway position SDs in the AV and APP conditions ( $ps < .001$ ), which remained significant when accounting for age, sex, and their interactions with group (greater SDs in SUDs than DEP/ANX and HCs,  $ps < .001$ ; see **Table S6**). Our results here did not replicate the significant difference in CONF6 found in our prior report. When including only those participants with WRAT Reading scores, and adding possible main effects and interactions with WRAT Reading into the ANCOVA model above, the group effect only remained significant in the AV condition ( $F(2, 383) = 12.48$ ,  $p < 0.001$ ; see **Supplementary Results 2**).

#### *Response times*

ANOVAs also replicated the prior group differences observed in RTs in the AV condition ( $F(2, 475) = 16.31$ ,  $p < .001$ ; **Figure 3**) and a similar trend in the APP condition ( $F(2, 476) = 2.99$ ,  $p = .051$ ). Post-hoc contrasts indicated slower RTs in SUDs than in HCs (AV:  $t(475) = -4.98$ ,  $p < .001$ ; APP:  $t(475) = -2.10$ ,  $p = .037$ ) or DEP/ANX (AV:  $t(475) = -4.70$ ,  $p < .001$ ; APP:  $t(475) = -2.05$ ,  $p = .041$ ). These effects remained when accounting for age, sex, and their interactions with group (see **Table S7**). There was also an interaction between sex and group in the AV condition, indicating significant differences between all groups in females (SUDs > DEP/ANX > HCs) and a partially opposing pattern in males (with DEP/ANX instead showing *faster* RTs than HCs and SUDs). When including only those participants with WRAT Reading scores, and adding possible main effects and interactions with WRAT reading into the ANCOVA model above, the group and group-by-sex interaction effects in the AV condition remained significant (see **Supplementary Results 2**).

#### *Self-report*

ANOVAs revealed significant group differences in how enjoyable the positive stimuli were ( $F(2, 476) = 3.06$ ,  $p = .048$ ; lower in SUDs than HCs,  $p = .015$ ), how much individuals tried to move all the way toward the reward points ( $F(2, 476) = 6.91$ ,  $p = .001$ ; higher in SUDs than HCs and DEP/ANX,  $p < .001$  and  $p = .006$ , respectively), how much they tried to move all the way away from the aversive stimuli ( $F(2, 470) =$

Appendix 1 to Smith R, Lavalley CA, Taylor S, et al. Elevated decision uncertainty and reduced avoidance drives in depression, anxiety and substance use disorders during approach–avoidance conflict: a replication study. *J Psychiatry Neurosci* 2023. doi: 10.1503/jpn.220226. Copyright © 2023 The Author(s) or their employer(s). To receive this resource in an accessible format, please contact us at cmajgroup@cmaj.ca. Online appendices are unedited and posted as supplied by the authors.

8.99,  $p < .001$ ; lower in SUDs than HCs and DEP/ANX,  $ps \leq .001$ ), and the extent to which they used different emotion regulation strategies to minimize the influence of the negative images (Q6, Q7, and Q8 in **Table 4**; lower in SUDs than HCs and DEP/ANX in all cases,  $F(2, 476) = 6.04 - 11.74$ ,  $ps < .001$  to  $.003$ ). These results remained significant after accounting for age, sex, and their interactions with group (see **Table S8**). For **Q2** in **Table 4** (how much anxiety the negative images provoked), an interaction between sex and group indicated significantly lower anxiety in SUDs than HCs ( $t(470) = 2.42$ ,  $p = 0.016$ ) and DEP/ANX ( $t(470) = 2.32$ ,  $p = 0.021$ ) in females, but no significant differences in males. Question **Q5** in **Table 4** (how much individuals tried to move all the way from the aversive stimuli) also showed an interaction between sex and group indicating significantly less avoidance in SUDs than HCs ( $t(470) = 4.81$ ,  $p < 0.001$ ) and DEP/ANX ( $t(470) = 4.14$ ,  $p < 0.001$ ) in females, but no significant differences in males. When including only those participants with WRAT reading scores, and adding possible main effects and interactions with WRAT Reading into the ANCOVA model above, effects of group largely remained significant. However, the group difference in how enjoyable the positive stimuli were did not reach significance ( $p = .052$ ; see **Supplementary Results 2**). These results differed from our previous report, in which we only observed group differences for one of the items reflecting use of emotion regulation strategies (i.e., **Q8** in **Table 4**; see **Figure 3**).

#### **Descriptive statistics for secondary measures**

Below are descriptive results for all model-free behavioral measures. Statistical analyses comparing these variables by group are reported in **Tables S5-S8**.

**Table S1. Summary statistics for mean chosen runway position (Mean (SD))**

| <b>Chosen Runway Position (Mean)</b> | <b>HCs<br/>(N = 97)</b> | <b>DEP/ANX<br/>(N = 208)</b> | <b>SUDs<br/>(N = 175)</b> |
|--------------------------------------|-------------------------|------------------------------|---------------------------|
| <b>Overall</b>                       | 6.98 (1.92)             | 7.20 (1.81)                  | 7.51 (1.43)               |
| <b>AV</b>                            | 8.25 (1.44)             | 8.01 (1.62)                  | 6.78 (2.07)               |
| <b>APP</b>                           | 8.43 (1.33)             | 8.20 (1.63)                  | 8.01 (1.55)               |
| <b>CONF2</b>                         | 5.75 (3.12)             | 6.25 (2.94)                  | 7.32 (2.14)               |
| <b>CONF4</b>                         | 6.13 (3.12)             | 6.63 (2.86)                  | 7.66 (1.91)               |
| <b>CONF6</b>                         | 6.35 (3.26)             | 6.92 (2.84)                  | 7.78 (2.04)               |

**\*Values range from 1 to 9. Higher values always indicate approaching the more positive stimulus in each condition (i.e., approaching the positive image in the Avoid Condition and approaching the points in all other conditions). Note that in previous papers<sup>6,9</sup> these values were reported on a scale from 2 to 10 (matching the positions as encoded in the computational model).**

Appendix 1 to Smith R, Lavalley CA, Taylor S, et al. Elevated decision uncertainty and reduced avoidance drives in depression, anxiety and substance use disorders during approach–avoidance conflict: a replication study. *J Psychiatry Neurosci* 2023. doi: 10.1503/jpn.220226. Copyright © 2023 The Author(s) or their employer(s). To receive this resource in an accessible format, please contact us at cmajgroup@cmaj.ca. Online appendices are unedited and posted as supplied by the authors.

**Table S2. Summary statistics for within-subject variability (SD) in chosen runway position (Mean (SD))**

| <b>Chosen Runway Position (SD)</b> | <b>HCs<br/>(N = 97)</b> | <b>DEP/ANX<br/>(N = 208)</b> | <b>SUDs<br/>(N = 175)</b> |
|------------------------------------|-------------------------|------------------------------|---------------------------|
| <b>Overall</b>                     | 2.09 (1.38)             | 1.99 (1.32)                  | 2.03 (1.08)               |
| <b>AV</b>                          | 0.83 (1.14)             | 0.95 (1.16)                  | 1.76 (1.31)               |
| <b>APP</b>                         | 0.61 (1.07)             | 0.78 (1.17)                  | 1.13 (1.21)               |
| <b>CONF2</b>                       | 1.03 (1.12)             | 1.24 (1.23)                  | 1.39 (1.35)               |
| <b>CONF4</b>                       | 0.98 (1.15)             | 1.07 (1.23)                  | 1.30 (1.30)               |
| <b>CONF6</b>                       | 0.80 (1.15)             | 0.98 (1.19)                  | 1.14 (1.33)               |

**Table S3. Summary statistics for task response times (Mean (SD))**

| <b>Response times<br/>(sec)</b> | <b>HCs<br/>(N = 97)</b> | <b>DEP/ANX<br/>(N = 208)</b> | <b>SUDs<br/>(N = 175)</b> |
|---------------------------------|-------------------------|------------------------------|---------------------------|
| <b>Overall</b>                  | 1.24 (0.27)             | 1.25 (0.29)                  | 1.30 (0.33)               |
| <b>AV</b>                       | 1.30 (0.35)             | 1.35 (0.31)                  | 1.51 (0.35)               |
| <b>APP</b>                      | 1.20 (0.30)             | 1.22 (0.35)                  | 1.29 (0.40)               |
| <b>CONF2</b>                    | 1.25 (0.31)             | 1.25 (0.34)                  | 1.26 (0.38)               |
| <b>CONF4</b>                    | 1.19 (0.31)             | 1.22 (0.37)                  | 1.21 (0.36)               |
| <b>CONF6</b>                    | 1.24 (0.30)             | 1.23 (0.33)                  | 1.22 (0.37)               |

Appendix 1 to Smith R, Lavalley CA, Taylor S, et al. Elevated decision uncertainty and reduced avoidance drives in depression, anxiety and substance use disorders during approach–avoidance conflict: a replication study. *J Psychiatry Neurosci* 2023. doi: 10.1503/jpn.220226. Copyright © 2023 The Author(s) or their employer(s). To receive this resource in an accessible format, please contact us at [cmajgroup@cmaj.ca](mailto:cmajgroup@cmaj.ca). Online appendices are unedited and posted as supplied by the authors.

**Table S4. Task-specific self-report questionnaire summary statistics (Mean (SD))**

| <b>Post-Task Self-Report Questions (Likert Scale: 1 = not at all; 7 = very much)</b>                        | <b>HCs<br/>(N = 97)</b> | <b>DEP/ANX<br/>(N = 208)</b> | <b>SUDs<br/>(N = 175)</b> |
|-------------------------------------------------------------------------------------------------------------|-------------------------|------------------------------|---------------------------|
| <b>Q1. I found the positive pictures enjoyable:</b>                                                         | 5.31 (1.39)             | 5.05 (1.53)                  | 4.83 (1.66)               |
| <b>Q2. The negative pictures made me feel anxious or uncomfortable:</b>                                     | 4.01 (2.01)             | 4.18 (1.96)                  | 3.80 (1.96)               |
| <b>Q3. I often found it difficult to decide which outcome I wanted:</b>                                     | 2.11 (1.66)             | 2.31 (1.71)                  | 2.45 (1.75)               |
| <b>Q4. I always tried to move all the way towards the outcome with the largest reward points:</b>           | 4.34 (2.55)             | 4.70 (2.40)                  | 5.36 (2.08)               |
| <b>Q5. I always tried to move all the way away from the outcome with the negative pictures/sounds:</b>      | 3.24 (2.37)             | 3.12 (2.25)                  | 2.33 (1.79)               |
| <b>Q6. When a negative picture and sound were displayed, I kept my eyes open and looked at the picture:</b> | 5.13 (2.00)             | 5.25 (1.92)                  | 5.82 (1.72)               |
| <b>Q7. When a negative picture and sound were displayed, I tried to think about something unrelated</b>     | 3.14 (2.07)             | 3.15 (1.93)                  | 2.29 (1.65)               |

Appendix 1 to Smith R, Lavalley CA, Taylor S, et al. Elevated decision uncertainty and reduced avoidance drives in depression, anxiety and substance use disorders during approach–avoidance conflict: a replication study. *J Psychiatry Neurosci* 2023. doi: 10.1503/jpn.220226. Copyright © 2023 The Author(s) or their employer(s). To receive this resource in an accessible format, please contact us at cmajgroup@cmaj.ca. Online appendices are unedited and posted as supplied by the authors.

|                                                                                                                                    |             |             |             |
|------------------------------------------------------------------------------------------------------------------------------------|-------------|-------------|-------------|
| <b>to the picture to distract myself:</b>                                                                                          |             |             |             |
| <b>Q8. When a negative picture and sound were displayed, I tried other strategies to manage emotions triggered by the pictures</b> | 3.28 (1.92) | 3.37 (1.94) | 2.51 (1.76) |

**ANCOVA analyses for secondary measures**

**Table S5. Results of ANCOVA models examining group differences in mean chosen runway position by trial type, when accounting for main effects and interactions with age and sex.**

| <b>Chosen Runway Position (Mean)</b> | <b>Age</b>                                                                                           | <b>Sex</b>                                                                                     | <b>Group</b>                                                                                                                                                                                                                                                                                                                                                        | <b>Age*Group</b>                                                                                                                                     | <b>Group*Sex</b>                                                                                                                                           |
|--------------------------------------|------------------------------------------------------------------------------------------------------|------------------------------------------------------------------------------------------------|---------------------------------------------------------------------------------------------------------------------------------------------------------------------------------------------------------------------------------------------------------------------------------------------------------------------------------------------------------------------|------------------------------------------------------------------------------------------------------------------------------------------------------|------------------------------------------------------------------------------------------------------------------------------------------------------------|
| Overall                              | F(1, 471) = 18.42<br><b>p &lt; 0.001</b><br><br>B [CI]:<br>Age:<br>-0.01 [-0.04, 0.02],<br>p = 0.379 | F(1, 471) = 2.49<br>p = 0.115<br><br>B [CI]:<br>Sex:<br>0.43 [0.09, 0.77],<br><b>p = 0.013</b> | F(2, 471) = 3.98<br><b>p = 0.019</b><br><br>B [CI]:<br>DEP/ANX:<br>0.21 [-0.22, 0.64],<br>p = 0.340<br>SUDs:<br>0.47 [0.04, 0.89],<br><b>p = 0.033</b><br><br><u>Post-hoc Contrasts</u><br>HC - DEP/ANX:<br>-0.32, t(471) = -1.54,<br>p = 0.123<br>HC - SUDs:<br>-0.62, t(471) = -2.93,<br><b>p = 0.004</b><br>DEP/ANX - SUDs:<br>-0.303, t(471) = -1.75, p = 0.080 | F(2, 471) = 2.36<br>p = 0.095<br><br>B [CI]:<br>Age*DEP/ANX:<br>-0.02 [-0.06, 0.02],<br>p = 0.356<br>Age*SUDs:<br>-0.05 [-0.09, 0], <b>p = 0.032</b> | F(2, 471) = 2.2<br>p = 0.112<br><br>B [CI]:<br>DEP/ANX*Sex:<br>-0.32 [-0.75, 0.11],<br>p = 0.147<br>SUDs*Sex:<br>-0.46 [-0.89, -0.03],<br><b>p = 0.037</b> |
| AV                                   | F(1, 471) = 10.06<br><b>p = 0.002</b>                                                                | F(1, 471) = 0.04<br>p = 0.848                                                                  | F(2, 471) = 30.29<br><b>p &lt; 0.001</b><br><br>B [CI]:                                                                                                                                                                                                                                                                                                             | F(2, 471) = 0.89<br>p = 0.409<br><br>B [CI]:                                                                                                         | F(2, 471) = 1.59<br>p = 0.205<br><br>B [CI]:                                                                                                               |



Appendix 1 to Smith R, Lavalley CA, Taylor S, et al. Elevated decision uncertainty and reduced avoidance drives in depression, anxiety and substance use disorders during approach–avoidance conflict: a replication study. *J Psychiatry Neurosci* 2023. doi: 10.1503/jpn.220226. Copyright © 2023 The Author(s) or their employer(s). To receive this resource in an accessible format, please contact us at cmajgroup@cmaj.ca. Online appendices are unedited and posted as supplied by the authors.

|       |                                                                                                                      |                                                                                                                  |                                                                                                                                                                                                                                                                                                                                                   |                                                                                                                                                                                                                                                                                                                                                                                                                   |                                                                                                                                                                                                                                                       |
|-------|----------------------------------------------------------------------------------------------------------------------|------------------------------------------------------------------------------------------------------------------|---------------------------------------------------------------------------------------------------------------------------------------------------------------------------------------------------------------------------------------------------------------------------------------------------------------------------------------------------|-------------------------------------------------------------------------------------------------------------------------------------------------------------------------------------------------------------------------------------------------------------------------------------------------------------------------------------------------------------------------------------------------------------------|-------------------------------------------------------------------------------------------------------------------------------------------------------------------------------------------------------------------------------------------------------|
|       | <p><b>B [CI]:</b><br/>Age:<br/>-0.01 [-0.04, 0.02],<br/>p = 0.594</p>                                                | <p><b>B [CI]:</b><br/>Sex:<br/>-0.16 [-0.52, 0.19],<br/>p = 0.37</p>                                             | <p>DEP/ANX:<br/>-0.22 [-0.67, 0.24],<br/>p = 0.349<br/>SUDs:<br/>-1.36 [-1.81, -0.91],<br/><b>p &lt; 0.001</b></p> <p><u>Post-hoc Contrasts</u><br/>HC - DEP/ANX:<br/>0.25, t(471) = 1.15,<br/>p = 0.253<br/>HC - SUDs:<br/>1.50, t(471) = 6.63,<br/><b>p &lt; 0.001</b><br/>DEP/ANX - SUDs:<br/>1.24, t(471) = 6.80,<br/><b>p &lt; 0.001</b></p> | <p>Age*DEP/ANX:<br/>-0.02 [-0.06, 0.02],<br/>p = 0.277<br/>Age*SUDs:<br/>-0.03 [-0.07, 0.02],<br/>p = 0.21</p>                                                                                                                                                                                                                                                                                                    | <p>DEP/ANX*Sex:<br/>0.1 [-0.36, 0.55],<br/>p = 0.681<br/>SUDs*Sex:<br/>0.37 [-0.08, 0.83],<br/>p = 0.107</p>                                                                                                                                          |
| APP   | <p>F(1, 471) = 30.15<br/><b>p &lt; 0.001</b></p> <p><b>B [CI]:</b><br/>Age:<br/>-0.01 [-0.03, 0.02],<br/>p = 0.6</p> | <p>F(1, 471) = 0.6<br/>p = 0.437</p> <p><b>B [CI]:</b><br/>Sex:<br/>0.07 [-0.24, 0.37],<br/>p = 0.665</p>        | <p>F(2, 471) = 1.94<br/>p = 0.145</p> <p><b>B [CI]:</b><br/>DEP/ANX:<br/>-0.22 [-0.61, 0.17],<br/>p = 0.263<br/>SUDs:<br/>-0.39 [-0.77, 0],<br/><b>p = 0.048</b></p>                                                                                                                                                                              | <p>F(2, 471) = 3.67<br/><b>p = 0.026</b></p> <p><b>B [CI]:</b><br/>Age*DEP/ANX:<br/>-0.04 [-0.08, -0.01],<br/><b>p = 0.01</b><br/>Age*SUDs:<br/>-0.04 [-0.08, 0],<br/><b>p = 0.034</b></p> <p><u>Post-hoc Contrasts</u><br/>HC - DEP/ANX:<br/>0.04, t(471) = 2.58,<br/><b>p = 0.010</b><br/>HC - SUDs:<br/>0.04, t(471) = 2.13,<br/><b>p = 0.034</b><br/>DEP/ANX - SUDs:<br/>0, t(471) = -0.15,<br/>p = 0.882</p> | <p>F(2, 471) = 0.23<br/>p = 0.793</p> <p><b>B [CI]:</b><br/>DEP/ANX*Sex:<br/>-0.07 [-0.46, 0.32],<br/>p = 0.722<br/>SUDs*Sex:<br/>0.05 [-0.34, 0.43],<br/>p = 0.816</p>                                                                               |
| CONF2 | <p>F(1, 471) = 6.5<br/><b>p = 0.011</b></p> <p><b>B [CI]:</b><br/>Age:<br/>0 [-0.05, 0.04], p = 0.866</p>            | <p>F(1, 471) = 2.34<br/>p = 0.126</p> <p><b>B [CI]:</b><br/>Sex:<br/>0.82 [0.28, 1.37],<br/><b>p = 0.003</b></p> | <p>F(2, 471) = 13.24<br/><b>p &lt; 0.001</b></p> <p><b>B [CI]:</b><br/>DEP/ANX:<br/>0.47 [-0.22, 1.16],<br/>p = 0.183<br/>SUDs:<br/>1.37 [0.69, 2.05],<br/><b>p &lt; 0.001</b></p> <p><u>Post-hoc Contrasts</u><br/>HC - DEP/ANX:<br/>-0.66, t(471) = -1.99,</p>                                                                                  | <p>F(2, 471) = 2.88<br/>p = 0.057</p> <p><b>B [CI]:</b><br/>Age*DEP/ANX:<br/>-0.02 [-0.08, 0.04],<br/>p = 0.585<br/>Age*SUDs:<br/>-0.08 [-0.15, -0.01],<br/><b>p = 0.025</b></p>                                                                                                                                                                                                                                  | <p>F(2, 471) = 4.48<br/><b>p = 0.012</b></p> <p><b>B [CI]:</b><br/>DEP/ANX*Sex: -<br/>0.56 [-1.25, 0.13],<br/>p = 0.111<br/>SUDs*Sex:<br/>-1.04 [-1.73, -0.36],<br/><b>p = 0.003</b></p> <p><u>Post-hoc Contrasts</u><br/>Male:<br/>HC - DEP/ANX:</p> |

Appendix 1 to Smith R, Lavalley CA, Taylor S, et al. Elevated decision uncertainty and reduced avoidance drives in depression, anxiety and substance use disorders during approach–avoidance conflict: a replication study. *J Psychiatry Neurosci* 2023. doi: 10.1503/jpn.220226. Copyright © 2023 The Author(s) or their employer(s). To receive this resource in an accessible format, please contact us at cmajgroup@cmaj.ca. Online appendices are unedited and posted as supplied by the authors.

|       |                                                                                                                                                                          |                                                                                                                                                                        |                                                                                                                                                                                                                                                                                                                                                                                                                                                                                                                                       |                                                                                                                                                                                                                                 |                                                                                                                                                                                                                                                                                                                                                                                                                                                                                                                                                                                                                                                                                                                                                                                                                                                                           |
|-------|--------------------------------------------------------------------------------------------------------------------------------------------------------------------------|------------------------------------------------------------------------------------------------------------------------------------------------------------------------|---------------------------------------------------------------------------------------------------------------------------------------------------------------------------------------------------------------------------------------------------------------------------------------------------------------------------------------------------------------------------------------------------------------------------------------------------------------------------------------------------------------------------------------|---------------------------------------------------------------------------------------------------------------------------------------------------------------------------------------------------------------------------------|---------------------------------------------------------------------------------------------------------------------------------------------------------------------------------------------------------------------------------------------------------------------------------------------------------------------------------------------------------------------------------------------------------------------------------------------------------------------------------------------------------------------------------------------------------------------------------------------------------------------------------------------------------------------------------------------------------------------------------------------------------------------------------------------------------------------------------------------------------------------------|
|       |                                                                                                                                                                          |                                                                                                                                                                        | <p><b>p = 0.047</b><br/>         HC - SUDs:<br/>         -1.73, t(471) = -5.08,<br/> <b>p &lt; 0.001</b><br/>         DEP/ANX - SUDs:<br/>         -1.07, t(472) = -3.87,<br/> <b>p &lt; 0.001</b></p>                                                                                                                                                                                                                                                                                                                                |                                                                                                                                                                                                                                 | <p>0.09, t(471) = 0.16,<br/>         p = 0.87<br/>         HC - SUDs:<br/>         -0.33, t(471) = -<br/>         0.60, p = 0.551<br/>         DEP/ANX - SUDs:<br/>         -0.42, t(471) = -<br/>         0.84, p = 0.403</p> <p>Female:<br/>         HC - DEP/ANX:<br/>         -1.03, t(471) = -<br/>         2.53, <b>p = 0.012</b><br/>         HC - SUDs:<br/>         -2.42, t(471) = -<br/>         5.57, <b>p &lt; 0.001</b><br/>         DEP/ANX - SUDs:<br/>         -1.39, t(472) = -<br/>         4.13, <b>p &lt; 0.001</b></p>                                                                                                                                                                                                                                                                                                                              |
| CONF4 | <p>F(1, 471) =<br/>         7.43<br/> <b>p = 0.007</b></p> <p><u>B [CI]:</u><br/>         Age:<br/>         -0.02 [-0.07,<br/>         0.02],<br/>         p = 0.357</p> | <p>F(1, 471) =<br/>         2.11<br/>         p = 0.147</p> <p><u>B [CI]:</u><br/>         Sex:<br/>         0.74 [0.21,<br/>         1.26],<br/> <b>p = 0.006</b></p> | <p>F(2, 471) = 13.3<br/> <b>p &lt; 0.001</b></p> <p><u>B [CI]:</u><br/>         DEP/ANX:<br/>         0.48 [-0.19, 1.15],<br/>         p = 0.162<br/>         SUDs:<br/>         1.38 [0.72, 2.04],<br/> <b>p &lt; 0.001</b></p> <p><u>Post-hoc Contrasts</u><br/>         HC - DEP/ANX:<br/>         -0.67, t(471) = -2.06,<br/> <b>p = 0.040</b><br/>         HC - SUDs:<br/>         -1.69, t(471) = -5.11,<br/> <b>p &lt; 0.001</b><br/>         DEP/ANX - SUDs:<br/>         -1.02, t(471) = -3.82,<br/> <b>p &lt; 0.001</b></p> | <p>F(2, 471) = 0.82<br/>         p = 0.441</p> <p><u>B [CI]:</u><br/>         Age*DEP/ANX:<br/>         0 [-0.06, 0.05], p =<br/>         0.9<br/>         Age*SUDs:<br/>         -0.04 [-0.1, 0.03], p<br/>         = 0.26</p> | <p>F(2, 471) = 3.44<br/> <b>p = 0.033</b></p> <p><u>B [CI]:</u><br/>         DEP/ANX*Sex:<br/>         -0.54 [-1.21, 0.13],<br/>         p = 0.115<br/>         SUDs*Sex:<br/>         -0.89 [-1.56, -0.22],<br/> <b>p = 0.009</b></p> <p><u>Post-hoc Contrasts</u><br/>         Male:<br/>         HC - DEP/ANX:<br/>         0.06, t(471) = 0.12,<br/>         p = 0.915<br/>         HC - SUDs:<br/>         -0.49, t(471) = -<br/>         0.92, p = 0.357<br/>         DEP/ANX - SUDs:<br/>         -0.55, t(471) = -<br/>         1.13, p = 0.260</p> <p>Female:<br/>         HC - DEP/ANX:<br/>         -1.02, t(471) = -<br/>         2.58, <b>p = 0.010</b><br/>         HC - SUDs:<br/>         -2.27, t(471) = -<br/>         5.41, <b>p &lt; 0.001</b><br/>         DEP/ANX - SUDs:<br/>         -1.25, t(471) = -<br/>         3.86, <b>p &lt; 0.001</b></p> |

Appendix 1 to Smith R, Lavalley CA, Taylor S, et al. Elevated decision uncertainty and reduced avoidance drives in depression, anxiety and substance use disorders during approach–avoidance conflict: a replication study. *J Psychiatry Neurosci* 2023. doi: 10.1503/jpn.220226. Copyright © 2023 The Author(s) or their employer(s). To receive this resource in an accessible format, please contact us at cmajgroup@cmaj.ca. Online appendices are unedited and posted as supplied by the authors.

|       |                                                                                                                        |                                                                                                                 |                                                                                                                                                                                                                                                                                                                                                                                                                                         |                                                                                                                                                                            |                                                                                                                                                                                        |
|-------|------------------------------------------------------------------------------------------------------------------------|-----------------------------------------------------------------------------------------------------------------|-----------------------------------------------------------------------------------------------------------------------------------------------------------------------------------------------------------------------------------------------------------------------------------------------------------------------------------------------------------------------------------------------------------------------------------------|----------------------------------------------------------------------------------------------------------------------------------------------------------------------------|----------------------------------------------------------------------------------------------------------------------------------------------------------------------------------------|
| CONF6 | <p>F(1, 471) = 9.33<br/> <b>p = 0.003</b></p> <p><u>B [CI]:</u><br/> Age:<br/> -0.03 [-0.07, 0.02],<br/> p = 0.294</p> | <p>F(1, 471) = 2.06<br/> p = 0.152</p> <p><u>B [CI]:</u><br/> Sex:<br/> 0.69 [0.15, 1.22], <b>p = 0.013</b></p> | <p>F(2, 471) = 10.74<br/> <b>p &lt; 0.001</b></p> <p><u>B [CI]:</u><br/> DEP/ANX:<br/> 0.54 [-0.14, 1.23],<br/> p = 0.12<br/> SUDs:<br/> 1.32 [0.65, 2],<br/> <b>p &lt; 0.001</b></p> <p><u>Post-hoc Contrasts</u><br/> HC - DEP/ANX:<br/> -0.72, t(471) = -2.20,<br/> <b>p = 0.029</b><br/> HC - SUDs:<br/> -1.59, t(471) = -4.70,<br/> <b>p &lt; 0.001</b><br/> DEP/ANX - SUDs:<br/> -0.86, t(471) = -3.15,<br/> <b>p = 0.002</b></p> | <p>F(2, 471) = 1.29<br/> p = 0.276</p> <p><u>B [CI]:</u><br/> Age*DEP/ANX:<br/> 0 [-0.06, 0.06],<br/> p = 0.96<br/> Age*SUDs:<br/> -0.05 [-0.12, 0.02],<br/> p = 0.175</p> | <p>F(2, 471) = 2.46<br/> p = 0.087</p> <p><u>B [CI]:</u><br/> DEP/ANX*Sex:<br/> -0.52 [-1.2, 0.16],<br/> p = 0.136<br/> SUDs*Sex:<br/> -0.77 [-1.45, -0.09],<br/> <b>p = 0.027</b></p> |
|-------|------------------------------------------------------------------------------------------------------------------------|-----------------------------------------------------------------------------------------------------------------|-----------------------------------------------------------------------------------------------------------------------------------------------------------------------------------------------------------------------------------------------------------------------------------------------------------------------------------------------------------------------------------------------------------------------------------------|----------------------------------------------------------------------------------------------------------------------------------------------------------------------------|----------------------------------------------------------------------------------------------------------------------------------------------------------------------------------------|

Appendix 1 to Smith R, Lavalley CA, Taylor S, et al. Elevated decision uncertainty and reduced avoidance drives in depression, anxiety and substance use disorders during approach–avoidance conflict: a replication study. *J Psychiatry Neurosci* 2023. doi: 10.1503/jpn.220226. Copyright © 2023 The Author(s) or their employer(s). To receive this resource in an accessible format, please contact us at cmajgroup@cmaj.ca. Online appendices are unedited and posted as supplied by the authors.

**Table S6. Results of ANCOVA models examining group differences in within-subject variability (SDs) in chosen runway position by trial type, when accounting for main effects and interactions with age and sex.**

| <b>Chosen Runway Position (SD)</b> | <b>Age</b>                                                                                                 | <b>Sex</b>                                                                                                | <b>Group</b>                                                                                                                                                                                                                                                                                                                                                                            | <b>Age*Group</b>                                                                                                                                                                                                                                                                                                                                                                  | <b>Group*Sex</b>                                                                                                                                           |
|------------------------------------|------------------------------------------------------------------------------------------------------------|-----------------------------------------------------------------------------------------------------------|-----------------------------------------------------------------------------------------------------------------------------------------------------------------------------------------------------------------------------------------------------------------------------------------------------------------------------------------------------------------------------------------|-----------------------------------------------------------------------------------------------------------------------------------------------------------------------------------------------------------------------------------------------------------------------------------------------------------------------------------------------------------------------------------|------------------------------------------------------------------------------------------------------------------------------------------------------------|
| Overall                            | F(1, 471) = 14.72<br><b>p &lt; 0.001</b><br><br><u>B [CI]:</u><br>Age:<br>0 [-0.02, 0.03],<br>p = 0.763    | F(1, 471) = 3.92<br><b>p = 0.048</b><br><br><u>B [CI]:</u><br>Sex:<br>-0.25 [-0.5, 0],<br><b>p = 0.05</b> | F(2, 471) = 0.63<br>p = 0.531<br><br><u>B [CI]:</u><br>DEP/ANX:<br>-0.14 [-0.46, 0.17],<br>p = 0.372<br>SUDs:<br>-0.03 [-0.35, 0.28],<br>p = 0.836                                                                                                                                                                                                                                      | F(2, 471) = 4.19<br><b>p = 0.016</b><br><br><u>B [CI]:</u><br>Age*DEP/ANX:<br>0.02 [-0.01, 0.04],<br>p = 0.28<br>Age*SUDs:<br>0.05 [0.01, 0.08],<br><b>p = 0.005</b><br><br><u>Post-hoc Contrasts</u><br>HC - DEP/ANX:<br>-0.02, t(471) = -1.08, p = 0.280<br>HC - SUDs:<br>-0.05, t(471) = -2.83, <b>p = 0.005</b><br>DEP/ANX - SUDs:<br>-0.03, t(471) = -2.12, p = <b>0.034</b> | F(2, 471) = 1.35<br>p = 0.26<br><br><u>B [CI]:</u><br>DEP/ANX*Sex:<br>0.09 [-0.23, 0.4],<br>p = 0.598<br>SUDs*Sex:<br>0.25 [-0.07, 0.56],<br>p = 0.123     |
| AV                                 | F(1, 471) = 19.41<br><b>p &lt; 0.001</b><br><br><u>B [CI]:</u><br>Age:<br>0.01 [-0.01, 0.03],<br>p = 0.247 | F(1, 471) = 0.1<br>p = 0.755<br><br><u>B [CI]:</u><br>Sex:<br>0.16 [-0.08, 0.4], p = 0.202                | F(2, 471) = 26.81<br><b>p &lt; 0.001</b><br><br><u>B [CI]:</u><br>DEP/ANX:<br>0.11 [-0.19, 0.42],<br>p = 0.471<br>SUDs:<br>0.83 [0.52, 1.13],<br><b>p &lt; 0.001</b><br><br><u>Post-hoc Contrasts</u><br>HC - DEP/ANX:<br>-0.13, t(471) = -0.89, p = 0.375<br>HC - SUDs:<br>-0.93, t(471) = -6.13, <b>p &lt; 0.001</b><br>DEP/ANX - SUDs:<br>-0.80, t(471) = -6.50, <b>p &lt; 0.001</b> | F(2, 471) = 1.81<br>p = 0.165<br><br><u>B [CI]:</u><br>Age*DEP/ANX:<br>0.01 [-0.02, 0.04],<br>p = 0.464<br>Age*SUDs:<br>0.03 [0, 0.06],<br>p = 0.063                                                                                                                                                                                                                              | F(2, 471) = 2.58<br>p = 0.077<br><br><u>B [CI]:</u><br>DEP/ANX*Sex:<br>-0.05 [-0.36, 0.25],<br>p = 0.736<br>SUDs*Sex:<br>-0.31 [-0.61, 0], <b>p = 0.05</b> |

Appendix 1 to Smith R, Lavalley CA, Taylor S, et al. Elevated decision uncertainty and reduced avoidance drives in depression, anxiety and substance use disorders during approach–avoidance conflict: a replication study. *J Psychiatry Neurosci* 2023. doi: 10.1503/jpn.220226. Copyright © 2023 The Author(s) or their employer(s). To receive this resource in an accessible format, please contact us at cmajgroup@cmaj.ca. Online appendices are unedited and posted as supplied by the authors.

|       |                                                                                                                       |                                                                                                                |                                                                                                                                                                                                                                                                                                                                                                                                      |                                                                                                                                                                                                                                                                                                                                                                                                              |                                                                                                                                                                         |
|-------|-----------------------------------------------------------------------------------------------------------------------|----------------------------------------------------------------------------------------------------------------|------------------------------------------------------------------------------------------------------------------------------------------------------------------------------------------------------------------------------------------------------------------------------------------------------------------------------------------------------------------------------------------------------|--------------------------------------------------------------------------------------------------------------------------------------------------------------------------------------------------------------------------------------------------------------------------------------------------------------------------------------------------------------------------------------------------------------|-------------------------------------------------------------------------------------------------------------------------------------------------------------------------|
| APP   | <p>F(1, 471) = 39.21<br/><b>p &lt; 0.001</b></p> <p><u>B [CI]:</u><br/>Age:<br/>0.01 [-0.01, 0.03],<br/>p = 0.313</p> | <p>F(1, 471) = 1.87<br/>p = 0.172</p> <p><u>B [CI]:</u><br/>Sex:<br/>0 [-0.23, 0.22],<br/>p = 0.969</p>        | <p>F(2, 471) = 7.38<br/><b>p &lt; 0.001</b></p> <p><u>B [CI]:</u><br/>DEP/ANX:<br/>0.08 [-0.21, 0.37],<br/>p = 0.586<br/>SUDs:<br/>0.47 [0.19, 0.76],<br/><b>p = 0.001</b></p> <p><u>Post-hoc Contrasts</u><br/>HC - DEP/ANX:<br/>-0.12, t(471) = -0.85, p = 0.395<br/>HC - SUDs:<br/>-0.50, t(471) = -3.49, <b>p &lt; 0.001</b><br/>DEP/ANX - SUDs:<br/>-0.38, t(471) = -3.28, <b>p = 0.001</b></p> | <p>F(2, 471) = 3.84<br/><b>p = 0.022</b></p> <p><u>B [CI]:</u><br/>Age*DEP/ANX:<br/>0.03 [0, 0.05],<br/><b>p = 0.036</b><br/>Age*SUDs:<br/>0.04 [0.01, 0.07], <b>p = 0.008</b></p> <p><u>Post-hoc Contrasts</u><br/>HC - DEP/ANX:<br/>-0.03, t(471) = -2.10, <b>p = 0.037</b><br/>HC - SUDs:<br/>-0.04, t(471) = -2.67, <b>p = 0.008</b><br/>DEP/ANX - SUDs:<br/>-0.01, t(471) = -0.94, p = 0.346</p>        | <p>F(2, 471) = 0.28<br/>p = 0.753</p> <p><u>B [CI]:</u><br/>DEP/ANX*Sex:<br/>-0.11 [-0.4, 0.18],<br/>p = 0.455<br/>SUDs*Sex:<br/>-0.08 [-0.37, 0.21],<br/>p = 0.595</p> |
| CONF2 | <p>F(1, 471) = 21.4<br/><b>p &lt; 0.001</b></p> <p><u>B [CI]:</u><br/>Age:<br/>0.01 [-0.01, 0.03],<br/>p = 0.503</p>  | <p>F(1, 471) = 4.48<br/><b>p = 0.035</b></p> <p><u>B [CI]:</u><br/>Sex:<br/>-0.09 [-0.34, 0.15], p = 0.463</p> | <p>F(2, 471) = 2.23<br/>p = 0.109</p> <p><u>B [CI]:</u><br/>DEP/ANX:<br/>0.08 [-0.24, 0.39],<br/>p = 0.626<br/>SUDs:<br/>0.34 [0.03, 0.65],<br/><b>p = 0.033</b></p>                                                                                                                                                                                                                                 | <p>F(2, 471) = 6.78<br/><b>p = 0.001</b></p> <p><u>B [CI]:</u><br/>Age*DEP/ANX:<br/>0.01 [-0.02, 0.04],<br/>p = 0.435<br/>Age*SUDs:<br/>0.05 [0.02, 0.09],<br/><b>p &lt; 0.001</b></p> <p><u>Post-hoc Contrasts</u><br/>HC - DEP/ANX:<br/>-0.01, t(471) = -0.78, p = 0.435<br/>HC - SUDs:<br/>-0.05, t(471) = -3.42, <b>p &lt; 0.001</b><br/>DEP/ANX - SUDs:<br/>-0.04, t(471) = -3.09, <b>p = 0.002</b></p> | <p>F(2, 471) = 1.42<br/>p = 0.243</p> <p><u>B [CI]:</u><br/>DEP/ANX*Sex:<br/>-0.16 [-0.47, 0.15],<br/>p = 0.309<br/>SUDs*Sex:<br/>0.07 [-0.25, 0.38],<br/>p = 0.677</p> |
| CONF4 | <p>F(1, 471) = 9.41<br/><b>p = 0.002</b></p> <p><u>B [CI]:</u><br/>Age:<br/>0 [-0.02, 0.03],<br/>p = 0.656</p>        | <p>F(1, 471) = 1.87<br/>p = 0.173</p> <p><u>B [CI]:</u><br/>Sex:<br/>-0.09 [-0.34, 0.15], p = 0.457</p>        | <p>F(2, 471) = 2.49<br/>p = 0.084</p> <p><u>B [CI]:</u><br/>DEP/ANX:<br/>-0.01 [-0.32, 0.31],<br/>p = 0.973<br/>SUDs:<br/>0.31 [0, 0.63],</p>                                                                                                                                                                                                                                                        | <p>F(2, 471) = 5.37<br/><b>p = 0.005</b></p> <p><u>B [CI]:</u><br/>Age*DEP/ANX:<br/>0 [-0.02, 0.03],<br/>p = 0.857<br/>Age*SUDs:<br/>0.04 [0.01, 0.08],<br/><b>p = 0.005</b></p>                                                                                                                                                                                                                             | <p>F(2, 471) = 1.27<br/>p = 0.283</p> <p><u>B [CI]:</u><br/>DEP/ANX*Sex:<br/>-0.1 [-0.41, 0.22],<br/>p = 0.543<br/>SUDs*Sex:<br/>0.12 [-0.19, 0.44],<br/>p = 0.44</p>   |

Appendix 1 to Smith R, Lavalley CA, Taylor S, et al. Elevated decision uncertainty and reduced avoidance drives in depression, anxiety and substance use disorders during approach–avoidance conflict: a replication study. *J Psychiatry Neurosci* 2023. doi: 10.1503/jpn.220226. Copyright © 2023 The Author(s) or their employer(s). To receive this resource in an accessible format, please contact us at cmajgroup@cmaj.ca. Online appendices are unedited and posted as supplied by the authors.

|       |                                                                                                     |                                                                                               |                                                                                                                                                        |                                                                                                                                                                                                                                                                                                                                                                                        |                                                                                                                                                         |
|-------|-----------------------------------------------------------------------------------------------------|-----------------------------------------------------------------------------------------------|--------------------------------------------------------------------------------------------------------------------------------------------------------|----------------------------------------------------------------------------------------------------------------------------------------------------------------------------------------------------------------------------------------------------------------------------------------------------------------------------------------------------------------------------------------|---------------------------------------------------------------------------------------------------------------------------------------------------------|
|       |                                                                                                     |                                                                                               | p = 0.055                                                                                                                                              | <u>Post-hoc Contrasts</u><br>HC - DEP/ANX:<br>0, t(471) = -0.18,<br>p = 0.857<br>HC - SUDs:<br>-0.04, t(471) = -<br>2.81, <b>p = 0.005</b><br>DEP/ANX - SUDs:<br>-0.04, t(471) = -<br>2.99, <b>p = 0.003</b>                                                                                                                                                                           |                                                                                                                                                         |
| CONF6 | F(1, 471) = 8.83<br><b>p = 0.003</b><br><br><u>B [CI]:</u><br>Age:<br>0 [-0.02, 0.03],<br>p = 0.674 | F(1, 471) = 0.96<br>p = 0.327<br><br><u>B [CI]:</u><br>Sex:<br>-0.16 [-0.41, 0.09], p = 0.211 | F(2, 471) = 2.04<br>p = 0.131<br><br><u>B [CI]:</u><br>DEP/ANX:<br>0.18 [-0.14, 0.49],<br>p = 0.275<br>SUDs:<br>0.34 [0.03, 0.65],<br><b>p = 0.032</b> | F(2, 471) = 4.85<br><b>p = 0.008</b><br><br><u>B [CI]:</u><br>Age*DEP/ANX:<br>0 [-0.02, 0.03],<br>p = 0.833<br>Age*SUDs:<br>0.04 [0.01, 0.07],<br><b>p = 0.007</b><br><br><u>Post-hoc Contrasts</u><br>HC - DEP/ANX:<br>0, t(471) = -0.21,<br>p = 0.833<br>HC - SUDs:<br>-0.04, t(471) = -<br>2.69, <b>p = 0.007</b><br>DEP/ANX - SUDs:<br>-0.04, t(471) = -<br>2.83, <b>p = 0.005</b> | F(2, 471) = 0.45<br>p = 0.64<br><br><u>B [CI]:</u><br>DEP/ANX*Sex:<br>0.11 [-0.21, 0.42],<br>p = 0.512<br>SUDs*Sex:<br>0.15 [-0.16, 0.46],<br>p = 0.347 |

Appendix 1 to Smith R, Lavalley CA, Taylor S, et al. Elevated decision uncertainty and reduced avoidance drives in depression, anxiety and substance use disorders during approach–avoidance conflict: a replication study. *J Psychiatry Neurosci* 2023. doi: 10.1503/jpn.220226. Copyright © 2023 The Author(s) or their employer(s). To receive this resource in an accessible format, please contact us at cmajgroup@cmaj.ca. Online appendices are unedited and posted as supplied by the authors.

**Table S7. Results of ANCOVA models examining group differences in response times by trial type, when accounting for main effects and interactions with age and sex.**

| Response times | Age                                                                                                                  | Sex                                                                                                      | Group                                                                                                                                                                                                                                                                                                                                                                                    | Age*Group                                                                                                                                    | Sex*Group                                                                                                                                                                                                                                                                                                                                                                                                                                                                                                                                                                                                             |
|----------------|----------------------------------------------------------------------------------------------------------------------|----------------------------------------------------------------------------------------------------------|------------------------------------------------------------------------------------------------------------------------------------------------------------------------------------------------------------------------------------------------------------------------------------------------------------------------------------------------------------------------------------------|----------------------------------------------------------------------------------------------------------------------------------------------|-----------------------------------------------------------------------------------------------------------------------------------------------------------------------------------------------------------------------------------------------------------------------------------------------------------------------------------------------------------------------------------------------------------------------------------------------------------------------------------------------------------------------------------------------------------------------------------------------------------------------|
| Overall        | F(1, 470) = 104.31<br><b>p &lt; 0.001</b><br><br><u>B [CI]:</u><br>Age:<br>0.01 [0.01, 0.02],<br><b>p &lt; 0.001</b> | F(1, 470) = 1.16<br>p = 0.282<br><br><u>B [CI]:</u><br>Sex:<br>0.04 [-0.01, 0.1], p = 0.147              | F(2, 470) = 1.72<br>p = 0.18<br><br><u>B [CI]:</u><br>DEP/ANX:<br>-0.03 [-0.11, 0.04],<br>p = 0.343<br>SUDs:<br>0.03 [-0.04, 0.1],<br>p = 0.382                                                                                                                                                                                                                                          | F(2, 470) = 1.67<br>p = 0.19<br><br><u>B [CI]:</u><br>Age*DEP/ANX:<br>0 [0, 0.01],<br>p = 0.461<br>Age*SUDs:<br>0.01 [0, 0.01],<br>p = 0.073 | F(2, 470) = 2.93<br>p = 0.055<br><br><u>B [CI]:</u><br>DEP/ANX*Sex:<br>-0.09 [-0.16, -0.02],<br><b>p = 0.016</b><br>SUDs*Sex:<br>-0.06 [-0.13, 0.01],<br>p = 0.098                                                                                                                                                                                                                                                                                                                                                                                                                                                    |
| AV             | F(1, 469) = 87.41<br><b>p &lt; 0.001</b><br><br><u>B [CI]:</u><br>Age:<br>0.01 [0.01, 0.02],<br><b>p &lt; 0.001</b>  | F(1, 469) = 0.01<br>p = 0.913<br><br><u>B [CI]:</u><br>Sex:<br>0.11 [0.05, 0.18],<br><b>p &lt; 0.001</b> | F(2, 469) = 17.28<br><b>p &lt; 0.001</b><br><br><u>B [CI]:</u><br>DEP/ANX:<br>-0.01 [-0.09, 0.07],<br>p = 0.836<br>SUDs:<br>0.16 [0.08, 0.23],<br><b>p &lt; 0.001</b><br><br><u>Post-hoc Contrasts</u><br>HC - DEP/ANX:<br>-0.04, t(469) = -1.04, p = 0.298<br>HC - SUDs:<br>-0.21, t(469) = -5.38, <b>p &lt; 0.001</b><br>DEP/ANX - SUDs:<br>-0.17, t(469) = -5.36, <b>p &lt; 0.001</b> | F(2, 469) = 0.35<br>p = 0.704<br><br><u>B [CI]:</u><br>Age*DEP/ANX:<br>0 [0, 0.01],<br>p = 0.475<br>Age*SUDs:<br>0 [0, 0.01],<br>p = 0.447   | F(2, 469) = 8.42<br><b>p &lt; 0.001</b><br><br><u>B [CI]:</u><br>DEP/ANX*Sex:<br>-0.14 [-0.22, -0.06],<br><b>p &lt; 0.001</b><br>SUDs*Sex:<br>-0.16 [-0.23, -0.08],<br><b>p &lt; 0.001</b><br><br><u>Post-hoc Contrasts</u><br>Male:<br>HC - DEP/ANX:<br>0.148, t(469) = 2.23,<br><b>p = 0.026</b><br>HC - SUDs:<br>0, t(469) = 0,<br>p = 0.999<br>DEP/ANX - SUDs:<br>-0.15, t(469) = -2.55, <b>p = 0.011</b><br><br>Female:<br>HC - DEP/ANX:<br>-0.13, t(469) = -2.81, <b>p = 0.005</b><br>HC - SUDs:<br>-0.31, t(469) = -6.28, <b>p &lt; 0.001</b><br>DEP/ANX - SUDs:<br>-0.18, t(469) = -4.71, <b>p &lt; 0.001</b> |

Appendix 1 to Smith R, Lavalley CA, Taylor S, et al. Elevated decision uncertainty and reduced avoidance drives in depression, anxiety and substance use disorders during approach–avoidance conflict: a replication study. *J Psychiatry Neurosci* 2023. doi: 10.1503/jpn.220226. Copyright © 2023 The Author(s) or their employer(s). To receive this resource in an accessible format, please contact us at cmajgroup@cmaj.ca. Online appendices are unedited and posted as supplied by the authors.

|       |                                                                                                                 |                                                                                             |                                                                                                                                                                                                                                                                                                                                                      |                                                                                                                                                                                                                                                                                                                                                                         |                                                                                                                                                                |
|-------|-----------------------------------------------------------------------------------------------------------------|---------------------------------------------------------------------------------------------|------------------------------------------------------------------------------------------------------------------------------------------------------------------------------------------------------------------------------------------------------------------------------------------------------------------------------------------------------|-------------------------------------------------------------------------------------------------------------------------------------------------------------------------------------------------------------------------------------------------------------------------------------------------------------------------------------------------------------------------|----------------------------------------------------------------------------------------------------------------------------------------------------------------|
| APP   | F(1, 470) = 89<br><b>p &lt; 0.001</b><br><u>B [CI]:</u><br>Age:<br>0.01 [0.01, 0.02],<br><b>p &lt; 0.001</b>    | F(1, 470) = 0.97<br>p = 0.324<br><u>B [CI]:</u><br>Sex:<br>0.02 [-0.05, 0.09],<br>p = 0.529 | F(2, 470) = 2.99<br>p = 0.051<br><u>B [CI]:</u><br>DEP/ANX:<br>-0.03 [-0.12, 0.05],<br>p = 0.478<br>SUDs:<br>0.07 [-0.02, 0.15],<br>p = 0.113<br><br><u>Post-hoc Contrasts</u><br>HC - DEP/ANX:<br>0.01, t(470) = 0.16,<br>p = 0.873<br>HC - SUDs:<br>-0.08, t(470) = -1.86, p = 0.064<br>DEP/ANX - SUDs:<br>-0.09, t(470) = -2.48, <b>p = 0.014</b> | F(2, 470) = 0.92<br>p = 0.399<br><u>B [CI]:</u><br>Age*DEP/ANX:<br>0.01 [0, 0.01],<br>p = 0.186<br>Age*SUDs:<br>0 [0, 0.01],<br>p = 0.325                                                                                                                                                                                                                               | F(2, 470) = 1.4<br>p = 0.248<br><u>B [CI]:</u><br>DEP/ANX*Sex:<br>-0.07 [-0.16, 0.02],<br>p = 0.106<br>SUDs*Sex:<br>-0.03 [-0.11, 0.06],<br>p = 0.502          |
| CONF2 | F(1, 470) = 90.06<br><b>p &lt; 0.001</b><br><u>B [CI]:</u><br>Age:<br>0.01 [0.01, 0.02],<br><b>p &lt; 0.001</b> | F(1, 470) = 1.84<br>p = 0.176<br><u>B [CI]:</u><br>Sex:<br>0.03 [-0.04, 0.1], p = 0.383     | F(2, 470) = 0.39<br>p = 0.678<br><u>B [CI]:</u><br>DEP/ANX:<br>-0.06 [-0.14, 0.02],<br>p = 0.157<br>SUDs:<br>-0.02 [-0.1, 0.07],<br>p = 0.715                                                                                                                                                                                                        | F(2, 470) = 3.38<br><b>p = 0.035</b><br><u>B [CI]:</u><br>Age*DEP/ANX:<br>0 [-0.01, 0.01],<br>p = 0.802<br>Age*SUDs:<br>0.01 [0, 0.02],<br><b>p = 0.023</b><br><br><u>Post-hoc Contrasts</u><br>HC - DEP/ANX:<br>0, t(470) = -0.25,<br>p = 0.802<br>HC - SUDs:<br>-0.01, t(470) = -2.28, <b>p = 0.023</b><br>DEP/ANX - SUDs:<br>-0.01, t(470) = -2.33, <b>p = 0.020</b> | F(2, 470) = 2.29<br>p = 0.103<br><u>B [CI]:</u><br>DEP/ANX*Sex:<br>-0.09 [-0.17, -0.01],<br><b>p = 0.035</b><br>SUDs*Sex:<br>-0.04 [-0.13, 0.04],<br>p = 0.296 |
| CONF4 | F(1, 470) = 63.92<br><b>p &lt; 0.001</b><br><u>B [CI]:</u><br>Age:<br>0.01 [0, 0.02],<br><b>p = 0.003</b>       | F(1, 470) = 1.12<br>p = 0.29<br><u>B [CI]:</u><br>Sex:<br>0.03 [-0.04, 0.09], p = 0.44      | F(2, 470) = 0.05<br>p = 0.954<br><u>B [CI]:</u><br>DEP/ANX:<br>-0.03 [-0.12, 0.06],<br>p = 0.499<br>SUDs:<br>-0.01 [-0.1, 0.07],                                                                                                                                                                                                                     | F(2, 470) = 1.54<br>p = 0.215<br><u>B [CI]:</u><br>Age*DEP/ANX:<br>0 [0, 0.01],<br>p = 0.388<br>Age*SUDs:<br>0.01 [0, 0.02],                                                                                                                                                                                                                                            | F(2, 470) = 2.36<br>p = 0.096<br><u>B [CI]:</u><br>DEP/ANX*Sex:<br>-0.09 [-0.18, 0], p = 0.044<br>SUDs*Sex:<br>-0.03 [-0.11, 0.06],                            |



Appendix 1 to Smith R, Lavalley CA, Taylor S, et al. Elevated decision uncertainty and reduced avoidance drives in depression, anxiety and substance use disorders during approach–avoidance conflict: a replication study. *J Psychiatry Neurosci* 2023. doi: 10.1503/jpn.220226. Copyright © 2023 The Author(s) or their employer(s). To receive this resource in an accessible format, please contact us at cmajgroup@cmaj.ca. Online appendices are unedited and posted as supplied by the authors.

|       |                                                                                                            |                                                                                              | p = 0.768                                                                                                                                    | p = 0.081                                                                                                                                   | p = 0.522                                                                                                                                            |
|-------|------------------------------------------------------------------------------------------------------------|----------------------------------------------------------------------------------------------|----------------------------------------------------------------------------------------------------------------------------------------------|---------------------------------------------------------------------------------------------------------------------------------------------|------------------------------------------------------------------------------------------------------------------------------------------------------|
| CONF6 | F(1, 470) = 49.54<br><b>p &lt; 0.001</b><br><br><u>B [CI]:</u><br>Age: 0.01 [0, 0.02],<br><b>p = 0.002</b> | F(1, 470) = 1.14<br>p = 0.286<br><br><u>B [CI]:</u><br>Sex: 0.02 [-0.04, 0.09],<br>p = 0.514 | F(2, 470) = 0.38<br>p = 0.684<br><br><u>B [CI]:</u><br>DEP/ANX: -0.05 [-0.13, 0.04],<br>p = 0.266<br>SUDs: -0.04 [-0.13, 0.04],<br>p = 0.313 | F(2, 470) = 2.19<br>p = 0.113<br><br><u>B [CI]:</u><br>Age*DEP/ANX: 0 [-0.01, 0.01],<br>p = 0.911<br>Age*SUDs: 0.01 [0, 0.02],<br>p = 0.096 | F(2, 470) = 0.92<br>p = 0.399<br><br><u>B [CI]:</u><br>DEP/ANX*Sex: -0.06 [-0.14, 0.03],<br>p = 0.193<br>SUDs*Sex: -0.05 [-0.13, 0.04],<br>p = 0.269 |

Appendix 1 to Smith R, Lavalley CA, Taylor S, et al. Elevated decision uncertainty and reduced avoidance drives in depression, anxiety and substance use disorders during approach–avoidance conflict: a replication study. *J Psychiatry Neurosci* 2023. doi: 10.1503/jpn.220226. Copyright © 2023 The Author(s) or their employer(s). To receive this resource in an accessible format, please contact us at cmajgroup@cmaj.ca. Online appendices are unedited and posted as supplied by the authors.

**Table S8. Results of ANCOVA models examining group differences in post-task self-report questions (listed in Table 4), when accounting for main effects and interactions with age and sex.**

| Self-Report Scale | Age                                                                                                   | Sex                                                                                                             | Group                                                                                                                                                                                                                                                                                                                                                      | Age*Group                                                                                                                                                                                                                                                                                                                                                         | Sex*Group                                                                                                                                                                                                                                                                                                                                                |
|-------------------|-------------------------------------------------------------------------------------------------------|-----------------------------------------------------------------------------------------------------------------|------------------------------------------------------------------------------------------------------------------------------------------------------------------------------------------------------------------------------------------------------------------------------------------------------------------------------------------------------------|-------------------------------------------------------------------------------------------------------------------------------------------------------------------------------------------------------------------------------------------------------------------------------------------------------------------------------------------------------------------|----------------------------------------------------------------------------------------------------------------------------------------------------------------------------------------------------------------------------------------------------------------------------------------------------------------------------------------------------------|
| Q1. Enjoyable     | F(1, 470) = 1.37<br>p = 0.243<br><br><u>B [CI]:</u><br>Age:<br>0.02 [0, 0.05], p = 0.103              | F(1, 470) = 9.92<br><b>p = 0.002</b><br><br><u>B [CI]:</u><br>Sex:<br>-0.15 [-0.47, 0.16], p = 0.344            | F(2, 470) = 3.24<br><b>p = 0.04</b><br><br><u>B [CI]:</u><br>DEP/ANX:<br>-0.37 [-0.77, 0.03], p = 0.073<br>SUDs:<br>-0.55 [-0.95, -0.16], <b>p = 0.006</b><br><br><u>Post-hoc Contrasts</u><br>HC - DEP/ANX:<br>0.35, t(470) = 1.80, p = 0.072<br>HC - SUDs:<br>0.49, t(470) = 2.48, <b>p = 0.013</b><br>DEP/ANX - SUDs:<br>0.14, t(470) = 0.90, p = 0.371 | F(2, 470) = 0.73<br>p = 0.484<br><br><u>B [CI]:</u><br>Age*DEP/ANX:<br>-0.02 [-0.05, 0.02], p = 0.273<br>Age*SUDs:<br>-0.02 [-0.06, 0.02], p = 0.305                                                                                                                                                                                                              | F(2, 470) = 0.48<br>p = 0.622<br><br><u>B [CI]:</u><br>DEP/ANX*Sex:<br>-0.06 [-0.45, 0.34], p = 0.785<br>SUDs*Sex:<br>-0.18 [-0.58, 0.21], p = 0.367                                                                                                                                                                                                     |
| Q2. Anxious       | F(1, 470) = 0.12<br>p = 0.727<br><br><u>B [CI]:</u><br>Age:<br>-0.04 [-0.08, -0.01], <b>p = 0.021</b> | F(1, 470) = 8.13<br><b>p = 0.005</b><br><br><u>B [CI]:</u><br>Sex:<br>-0.73 [-1.12, -0.33], <b>p &lt; 0.001</b> | F(2, 470) = 1.23<br>p = 0.294<br><br><u>B [CI]:</u><br>DEP/ANX:<br>0.22 [-0.28, 0.72], p = 0.389<br>SUDs:<br>0 [-0.5, 0.49], p = 0.985                                                                                                                                                                                                                     | F(2, 470) = 4.09<br><b>p = 0.017</b><br><br><u>B [CI]:</u><br>Age*DEP/ANX:<br>0.04 [0, 0.08], p = 0.069<br>Age*SUDs:<br>0.07 [0.02, 0.12], <b>p = 0.005</b><br><br><u>Post-hoc Contrasts</u><br>HC - DEP/ANX:<br>-0.04, t(470) = -1.82, p = 0.069<br>HC - SUDs:<br>-0.07, t(470) = -2.85, <b>p = 0.005</b><br>DEP/ANX - SUDs:<br>-0.03, t(470) = -1.41, p = 0.160 | F(2, 470) = 4.46<br><b>p = 0.012</b><br><br><u>B [CI]:</u><br>DEP/ANX*Sex:<br>0.42 [-0.08, 0.92], p = 0.103<br>SUDs*Sex:<br>0.76 [0.26, 1.26], <b>p = 0.003</b><br><br><u>Post-hoc Contrasts</u><br>Male:<br>HC - DEP/ANX:<br>-0.64, t(470) = -1.53, p = 0.127<br>HC - SUDs:<br>-0.75, t(470) = -1.89, p = 0.059<br>DEP/ANX - SUDs:<br>-0.12, t(470) = - |

Appendix 1 to Smith R, Lavalley CA, Taylor S, et al. Elevated decision uncertainty and reduced avoidance drives in depression, anxiety and substance use disorders during approach–avoidance conflict: a replication study. *J Psychiatry Neurosci* 2023. doi: 10.1503/jpn.220226. Copyright © 2023 The Author(s) or their employer(s). To receive this resource in an accessible format, please contact us at cmajgroup@cmaj.ca. Online appendices are unedited and posted as supplied by the authors.

|                       |                                                                                                           |                                                                                                   |                                                                                                                                                                                                                                                 |                                                                                                                                                                                                                                                                                                                                                                                                   |                                                                                                                                                                                                                           |
|-----------------------|-----------------------------------------------------------------------------------------------------------|---------------------------------------------------------------------------------------------------|-------------------------------------------------------------------------------------------------------------------------------------------------------------------------------------------------------------------------------------------------|---------------------------------------------------------------------------------------------------------------------------------------------------------------------------------------------------------------------------------------------------------------------------------------------------------------------------------------------------------------------------------------------------|---------------------------------------------------------------------------------------------------------------------------------------------------------------------------------------------------------------------------|
|                       |                                                                                                           |                                                                                                   |                                                                                                                                                                                                                                                 |                                                                                                                                                                                                                                                                                                                                                                                                   | 0.32, $p = 0.753$<br><br>Female:<br>HC - DEP/ANX:<br>0.20, $t(470) = 0.66$ , $p = 0.507$<br>HC - SUDs:<br>0.76, $t(470) = 2.42$ , $p = \mathbf{0.016}$<br>DEP/ANX - SUDs:<br>0.57, $t(470) = 2.32$ , $p = \mathbf{0.021}$ |
| Q3. Difficulty        | F(1, 470) = 6.31<br>$p = \mathbf{0.012}$<br><br><u>B [CI]:</u><br>Age:<br>0.01 [-0.02, 0.04], $p = 0.617$ | F(1, 470) = 3.26<br>$p = 0.072$<br><br><u>B [CI]:</u><br>Sex:<br>-0.22 [-0.56, 0.13], $p = 0.217$ | F(2, 470) = 1.06<br>$p = 0.346$<br><br><u>B [CI]:</u><br>DEP/ANX:<br>0.11 [-0.33, 0.55], $p = 0.634$<br>SUDs:<br>0.34 [-0.09, 0.78], $p = 0.121$                                                                                                | F(2, 470) = 4.08<br>$p = \mathbf{0.017}$<br><br><u>B [CI]:</u><br>Age*DEP/ANX:<br>0 [-0.04, 0.04], $p = 0.929$<br>Age*SUDs:<br>0.05 [0.01, 0.09], $p = \mathbf{0.021}$<br><br><u>Post-hoc Contrasts</u><br>HC - DEP/ANX:<br>0, $t(470) = 0.09$ , $p = 0.929$<br>HC - SUDs:<br>-0.05, $t(470) = -2.32$ , $p = \mathbf{0.021}$<br>DEP/ANX - SUDs:<br>-0.05, $t(470) = -2.70$ , $p = \mathbf{0.007}$ | F(2, 470) = 0.68<br>$p = 0.505$<br><br><u>B [CI]:</u><br>DEP/ANX*Sex:<br>-0.02 [-0.46, 0.42], $p = 0.918$<br>SUDs*Sex:<br>0.19 [-0.25, 0.63], $p = 0.396$                                                                 |
| Q4. Approached Points | F(1, 470) = 6.71<br>$p = \mathbf{0.01}$<br><br><u>B [CI]:</u><br>Age:<br>-0.01 [-0.06, 0.03], $p = 0.481$ | F(1, 470) = 0.35<br>$p = 0.552$<br><br><u>B [CI]:</u><br>Sex:<br>0.32 [-0.15, 0.79], $p = 0.188$  | F(2, 470) = 7.47<br>$p < \mathbf{0.001}$<br><br><u>B [CI]:</u><br>DEP/ANX:<br>0.3 [-0.17, 1.03], $p = 0.157$<br>SUDs:<br>0.94 [0.35, 1.53], $p = \mathbf{0.002}$<br><br><u>Post-hoc Contrasts</u><br>HC - DEP/ANX:<br>-0.46, $t(470) = -1.61$ , | F(2, 470) = 0.9<br>$p = 0.408$<br><br><u>B [CI]:</u><br>Age*DEP/ANX:<br>-0.01 [-0.06, 0.04], $p = 0.767$<br>Age*SUDs:<br>-0.04 [-0.1, 0.02], $p = 0.212$                                                                                                                                                                                                                                          | F(2, 470) = 2.24<br>$p = 0.107$<br><br><u>B [CI]:</u><br>DEP/ANX*Sex:<br>-0.09 [-0.68, 0.51], $p = 0.774$<br>SUDs*Sex:<br>-0.55 [-1.15, 0.04], $p = 0.069$                                                                |

Appendix 1 to Smith R, Lavalley CA, Taylor S, et al. Elevated decision uncertainty and reduced avoidance drives in depression, anxiety and substance use disorders during approach–avoidance conflict: a replication study. *J Psychiatry Neurosci* 2023. doi: 10.1503/jpn.220226. Copyright © 2023 The Author(s) or their employer(s). To receive this resource in an accessible format, please contact us at cmajgroup@cmaj.ca. Online appendices are unedited and posted as supplied by the authors.

|                             |                                                                                                                                      |                                                                                                                                              |                                                                                                                                                                                                                                                                                                                                                                                                                                                                                                 |                                                                                                                                                                                                                   |                                                                                                                                                                                                                                                                                                                                                                                                                                                                                                                                                                                                                                                                                                                                                                      |
|-----------------------------|--------------------------------------------------------------------------------------------------------------------------------------|----------------------------------------------------------------------------------------------------------------------------------------------|-------------------------------------------------------------------------------------------------------------------------------------------------------------------------------------------------------------------------------------------------------------------------------------------------------------------------------------------------------------------------------------------------------------------------------------------------------------------------------------------------|-------------------------------------------------------------------------------------------------------------------------------------------------------------------------------------------------------------------|----------------------------------------------------------------------------------------------------------------------------------------------------------------------------------------------------------------------------------------------------------------------------------------------------------------------------------------------------------------------------------------------------------------------------------------------------------------------------------------------------------------------------------------------------------------------------------------------------------------------------------------------------------------------------------------------------------------------------------------------------------------------|
|                             |                                                                                                                                      |                                                                                                                                              | <p>p = 0.109<br/>         HC - SUDs:<br/>         -1.13, t(470) = -3.82,<br/> <b>p &lt; 0.001</b><br/>         DEP/ANX - SUDs:<br/>         -0.67, t(470) = -2.77, <b>p = 0.006</b></p>                                                                                                                                                                                                                                                                                                         |                                                                                                                                                                                                                   |                                                                                                                                                                                                                                                                                                                                                                                                                                                                                                                                                                                                                                                                                                                                                                      |
| Q5. Avoided Negative Images | <p>F(1, 470) = 3.84<br/> <b>p = 0.05</b><br/><br/> <u>B [CI]:</u><br/>         Age:<br/>         -0.01 [-0.04, 0.03], p = 0.747</p>  | <p>F(1, 470) = 1.22<br/>         p = 0.27<br/><br/> <u>B [CI]:</u><br/>         Sex:<br/>         -0.65 [-1.08, -0.23], <b>p = 0.003</b></p> | <p>F(2, 470) = 8.99<br/> <b>p &lt; 0.001</b><br/><br/> <u>B [CI]:</u><br/>         DEP/ANX:<br/>         -0.05 [-0.59, 0.49], p = 0.854<br/>         SUDs:<br/>         -0.72 [-1.26, -0.19], <b>p = 0.008</b><br/><br/> <u>Post-hoc Contrasts</u><br/>         HC - DEP/ANX:<br/>         0.22, t(470) = 0.85, p = 0.397<br/>         HC - SUDs:<br/>         1.04, t(470) = 3.89, <b>p &lt; 0.001</b><br/>         DEP/ANX - SUDs:<br/>         0.818, t(470) = 3.77, <b>p &lt; 0.001</b></p> | <p>F(2, 470) = 2.35<br/>         p = 0.097<br/><br/> <u>B [CI]:</u><br/>         Age*DEP/ANX:<br/>         0.02 [-0.02, 0.07], p = 0.355<br/>         Age*SUDs:<br/>         0.06 [0, 0.11], <b>p = 0.033</b></p> | <p>F(2, 470) = 5.54<br/> <b>p = 0.004</b><br/><br/> <u>B [CI]:</u><br/>         DEP/ANX*Sex:<br/>         0.49 [-0.05, 1.03], p = 0.076<br/>         SUDs*Sex:<br/>         0.91 [0.37, 1.45], <b>p = 0.001</b><br/><br/> <u>Post-hoc Contrasts</u><br/>         Male:<br/>         HC - DEP/ANX:<br/>         -0.44, t(470) = -0.98, p = 0.330<br/>         HC - SUDs:<br/>         -0.19, t(470) = -0.43, p = 0.665<br/>         DEP/ANX - SUDs:<br/>         0.25, t(470) = 0.64, p = 0.520<br/><br/>         Female:<br/>         HC - DEP/ANX:<br/>         0.54, t(470) = 1.70, p = 0.090<br/>         HC - SUDs:<br/>         1.63, t(470) = 4.81, <b>p &lt; 0.001</b><br/>         DEP/ANX - SUDs:<br/>         1.09, t(470) = 4.14, <b>p &lt; 0.001</b></p> |
| Q6. Kept Eyes Open          | <p>F(1, 470) = 1.71<br/>         p = 0.191<br/><br/> <u>B [CI]:</u><br/>         Age:<br/>         0.01 [-0.02, 0.04], p = 0.583</p> | <p>F(1, 470) = 6.63<br/> <b>p = 0.01</b><br/><br/> <u>B [CI]:</u><br/>         Sex:<br/>         0.24 [-0.14, 0.62], p = 0.211</p>           | <p>F(2, 470) = 5.63<br/> <b>p = 0.004</b><br/><br/> <u>B [CI]:</u><br/>         DEP/ANX:<br/>         0.28 [-0.21, 0.76], p = 0.264</p>                                                                                                                                                                                                                                                                                                                                                         | <p>F(2, 470) = 1.09<br/>         p = 0.337<br/><br/> <u>B [CI]:</u><br/>         Age*DEP/ANX:<br/>         -0.03 [-0.07, 0.01], p = 0.143</p>                                                                     | <p>F(2, 470) = 1.65<br/>         p = 0.194<br/><br/> <u>B [CI]:</u><br/>         DEP/ANX*Sex:<br/>         0.19 [-0.29, 0.68], p = 0.433</p>                                                                                                                                                                                                                                                                                                                                                                                                                                                                                                                                                                                                                         |

Appendix 1 to Smith R, Lavalley CA, Taylor S, et al. Elevated decision uncertainty and reduced avoidance drives in depression, anxiety and substance use disorders during approach–avoidance conflict: a replication study. *J Psychiatry Neurosci* 2023. doi: 10.1503/jpn.220226. Copyright © 2023 The Author(s) or their employer(s). To receive this resource in an accessible format, please contact us at cmajgroup@cmaj.ca. Online appendices are unedited and posted as supplied by the authors.

|                                                  |                                                                                                            |                                                                                                                                     |                                                                                                                                                                                                                                                                                                                                                                                                                            |                                                                                                                                                                        |                                                                                                                                                                        |
|--------------------------------------------------|------------------------------------------------------------------------------------------------------------|-------------------------------------------------------------------------------------------------------------------------------------|----------------------------------------------------------------------------------------------------------------------------------------------------------------------------------------------------------------------------------------------------------------------------------------------------------------------------------------------------------------------------------------------------------------------------|------------------------------------------------------------------------------------------------------------------------------------------------------------------------|------------------------------------------------------------------------------------------------------------------------------------------------------------------------|
|                                                  |                                                                                                            |                                                                                                                                     | <p>SUDs:<br/>0.64 [0.16, 1.2],<br/><b>p = 0.009</b></p> <p><u>Post-hoc<br/>Contrasts</u><br/>HC - DEP/ANX:<br/>-0.21, t(470) = -<br/>0.90, p = 0.370<br/>HC - SUDs:<br/>-0.71, t(470) = -<br/>2.96, <b>p = 0.003</b><br/>DEP/ANX -<br/>SUDs:<br/>-0.50, t(470) = -<br/>2.57,<br/><b>p = 0.011</b></p>                                                                                                                      | <p>Age*SUDs:<br/>-0.02 [-0.07,<br/>0.02], p = 0.335</p>                                                                                                                | <p>SUDs*Sex:<br/>-0.19 [-0.68,<br/>0.29], p = 0.428</p>                                                                                                                |
| Q7. Distracted<br>Myself                         | <p>F(1, 470) = 0<br/>p = 0.973</p> <p><u>B [CI]:</u><br/>Age:<br/>-0.01 [-0.05,<br/>0.02], p = 0.395</p>   | <p>F(1, 470) =<br/>26.35<br/><b>p &lt; 0.001</b></p> <p><u>B [CI]:</u><br/>Sex:<br/>-0.6 [-0.98, -<br/>0.23], <b>p = 0.002</b></p>  | <p>F(2, 470) = 9.98<br/><b>p &lt; 0.001</b></p> <p><u>B [CI]:</u><br/>DEP/ANX:<br/>-0.12 [-0.59,<br/>0.36], p = 0.627<br/>SUDs:<br/>-0.78 [-1.24, -<br/>0.31], <b>p = 0.001</b></p> <p><u>Post-hoc<br/>Contrasts</u><br/>HC - DEP/ANX:<br/>0.14, t(470) =<br/>0.61, p = 0.543<br/>HC - SUDs:<br/>0.88, t(470) =<br/>3.75, <b>p &lt; 0.001</b><br/>DEP/ANX -<br/>SUDs:<br/>0.74, t(470) =<br/>3.89, <b>p &lt; 0.001</b></p> | <p>F(2, 470) = 0.83<br/>p = 0.436</p> <p><u>B [CI]:</u><br/>Age*DEP/ANX:<br/>0.01 [-0.03,<br/>0.06], p = 0.506<br/>Age*SUDs:<br/>0.03 [-0.02,<br/>0.08], p = 0.199</p> | <p>F(2, 470) = 0.91<br/>p = 0.402</p> <p><u>B [CI]:</u><br/>DEP/ANX*Sex:<br/>0.06 [-0.41,<br/>0.53], p = 0.799<br/>SUDs*Sex:<br/>0.29 [-0.18,<br/>0.76], p = 0.232</p> |
| Q8. Other<br>Emotion<br>Regulation<br>Strategies | <p>F(1, 470) = 1.77<br/>p = 0.184</p> <p><u>B [CI]:</u><br/>Age:<br/>0.02 [-0.02,<br/>0.05], p = 0.337</p> | <p>F(1, 470) =<br/>16.24<br/><b>p &lt; 0.001</b></p> <p><u>B [CI]:</u><br/>Sex:<br/>-0.56 [-0.94, -<br/>0.19], <b>p = 0.003</b></p> | <p>F(2, 470) = 9.56<br/><b>p &lt; 0.001</b></p> <p><u>B [CI]:</u><br/>DEP/ANX:<br/>-0.08 [-0.56,<br/>0.4], p = 0.737<br/>SUDs:<br/>-0.7 [-1.17, -<br/>0.23], <b>p = 0.004</b></p> <p><u>Post-hoc</u></p>                                                                                                                                                                                                                   | <p>F(2, 470) = 0.2<br/>p = 0.82</p> <p><u>B [CI]:</u><br/>Age*DEP/ANX:<br/>-0.01 [-0.05,<br/>0.03], p = 0.624<br/>Age*SUDs:<br/>0 [-0.05, 0.05], p<br/>= 0.959</p>     | <p>F(2, 470) = 2.6<br/>p = 0.075</p> <p><u>B [CI]:</u><br/>DEP/ANX*Sex:<br/>0.04 [-0.44,<br/>0.52], p = 0.874<br/>SUDs*Sex:<br/>0.46 [-0.02,<br/>0.93], p = 0.061</p>  |

Appendix 1 to Smith R, Lavalley CA, Taylor S, et al. Elevated decision uncertainty and reduced avoidance drives in depression, anxiety and substance use disorders during approach–avoidance conflict: a replication study. *J Psychiatry Neurosci* 2023. doi: 10.1503/jpn.220226. Copyright © 2023 The Author(s) or their employer(s). To receive this resource in an accessible format, please contact us at cmajgroup@cmaj.ca. Online appendices are unedited and posted as supplied by the authors.

|  |  |  |                                                                                                                                                                                                          |  |  |
|--|--|--|----------------------------------------------------------------------------------------------------------------------------------------------------------------------------------------------------------|--|--|
|  |  |  | <b>Contrasts</b><br>HC - DEP/ANX:<br>0.10, t(470) =<br>0.42, p = 0.679<br>HC - SUDs:<br>0.86, t(470) =<br>3.64, <b>p &lt; 0.001</b><br>DEP/ANX -<br>SUDs:<br>0.76, t(470) =<br>3.99, <b>p &lt; 0.001</b> |  |  |
|--|--|--|----------------------------------------------------------------------------------------------------------------------------------------------------------------------------------------------------------|--|--|

Note: See Table 4 for a reproduction of each question in full associated with Q1-Q8 here.

**Table S9. Means (SDs) for log-transformed model parameter values by specific disorder in combined exploratory and confirmatory sample**

| Group                               | EC          | DU          | EC (log-space) | DU (log-space) |
|-------------------------------------|-------------|-------------|----------------|----------------|
| <b>All Participants (N = 958)</b>   | 2.66 (2.82) | 4.64 (4.88) | 0.72 (0.80)    | 1.14 (0.96)    |
| <b>HC (N = 156)</b>                 | 3.50 (3.43) | 3.60 (4.09) | 0.98 (0.82)    | 0.93 (0.89)    |
| <b>SUDs (N = 334)</b>               | 1.90 (2.14) | 5.49 (5.42) | 0.47 (0.72)    | 1.32 (0.96)    |
| <b>Alcohol (N = 118)</b>            | 1.63 (1.78) | 5.90 (5.54) | 0.40 (0.64)    | 1.40 (0.97)    |
| <b>Cannabis (N = 158)</b>           | 2.00 (2.44) | 5.01 (5.22) | 0.46 (0.77)    | 1.20 (0.99)    |
| <b>Stimulant (N = 278)</b>          | 1.83 (2.02) | 5.34 (5.40) | 0.45 (0.71)    | 1.28 (0.97)    |
| <b>Only Stimulant (N = 62)</b>      | 2.17 (2.48) | 6.29 (6.30) | 0.55 (0.77)    | 1.41 (1.02)    |
| <b>Sedative (N = 84)</b>            | 1.36 (1.06) | 5.11 (5.07) | 0.30 (0.59)    | 1.27 (0.93)    |
| <b>Opioid (N = 122)</b>             | 1.69 (1.55) | 5.42 (5.34) | 0.44 (0.65)    | 1.33 (0.93)    |
| <b>Hallucinogens (N = 14)</b>       | 1.69 (0.78) | 6.71 (2.50) | 0.55 (0.45)    | 1.90 (0.36)    |
| <b>MDD (N = 193)</b>                | 1.92 (2.32) | 5.31 (5.38) | 0.48 (0.71)    | 1.25 (1.00)    |
| <b>GAD (N = 62)</b>                 | 1.57 (1.49) | 4.81 (5.14) | 0.41 (0.60)    | 1.39 (1.01)    |
| <b>SAD (N = 53)</b>                 | 2.14 (2.80) | 4.32 (4.85) | 0.54 (0.75)    | 1.10 (0.91)    |
| <b>Panic (N = 31)</b>               | 2.78 (3.37) | 5.82 (5.50) | 0.73 (0.84)    | 1.46 (0.90)    |
| <b>PTSD (N = 43)</b>                | 2.42 (2.69) | 5.74 (5.55) | 0.62 (0.80)    | 1.41 (0.91)    |
| <b>DEP/ANX (N = 468)</b>            | 2.92 (2.89) | 4.38 (4.62) | 0.81 (0.81)    | 1.09 (0.97)    |
| <b>MDD Inclusive (N = 426)</b>      | 2.87 (2.80) | 4.39 (4.67) | 0.81 (0.80)    | 1.09 (0.97)    |
| <b>Only MDD (N = 128)</b>           | 2.89 (3.21) | 4.30 (4.62) | 0.79 (0.81)    | 1.04 (1.01)    |
| <b>GAD Inclusive (N = 215)</b>      | 2.98 (2.70) | 4.22 (4.14) | 0.85 (0.81)    | 1.09 (0.95)    |
| <b>Only GAD (N = 14)</b>            | 3.39 (2.62) | 3.81 (3.06) | 1.02 (0.77)    | 1.15 (0.79)    |
| <b>Anxious Depression (N = 298)</b> | 2.87 (2.62) | 4.42 (4.70) | 0.81 (0.80)    | 1.12 (0.95)    |
| <b>SAD (N = 111)</b>                | 2.89 (2.75) | 3.56 (4.25) | 0.81 (0.80)    | 0.88 (0.95)    |
| <b>Panic (N = 82)</b>               | 2.73 (2.79) | 4.51 (5.17) | 0.73 (0.83)    | 1.09 (0.99)    |
| <b>PTSD (N = 80)</b>                | 3.01 (2.91) | 4.55 (4.94) | 0.84 (0.82)    | 1.14 (0.95)    |

Appendix 1 to Smith R, Lavalley CA, Taylor S, et al. Elevated decision uncertainty and reduced avoidance drives in depression, anxiety and substance use disorders during approach–avoidance conflict: a replication study. *J Psychiatry Neurosci* 2023. doi: 10.1503/jpn.220226. Copyright © 2023 The Author(s) or their employer(s). To receive this resource in an accessible format, please contact us at cmajgroup@cmaj.ca. Online appendices are unedited and posted as supplied by the authors.

**Table S10. Logistic regressions in SUDs predicting the presence of specific disorders compared to HCs (N = 156) in combined samples**

| Substance Use Disorders                  |            |              |             |              |                 |                                                              |
|------------------------------------------|------------|--------------|-------------|--------------|-----------------|--------------------------------------------------------------|
| Disorder & Mean (SD)                     | Effect     | Estimate*    | SE          | z            | p               | EC*Sex Interaction: B [CI]                                   |
| <b>Only Stimulant (N = 62)</b>           | <b>DU</b>  | <b>0.66</b>  | <b>0.22</b> | <b>2.96</b>  | <b>.003</b>     | Non-significant                                              |
|                                          | <b>EC</b>  | <b>-1.37</b> | <b>0.30</b> | <b>-4.56</b> | <b>&lt;.001</b> |                                                              |
|                                          | <b>Sex</b> | <b>-2.73</b> | <b>0.76</b> | <b>-3.61</b> | <b>&lt;.001</b> |                                                              |
|                                          | DU*Sex     | 0.66         | 0.49        | 1.34         | .181            |                                                              |
|                                          | EC*Sex     | 0.63         | 0.66        | 0.95         | .340            |                                                              |
| <b>Stimulant (N = 278)</b>               | <b>DU</b>  | <b>1.18</b>  | <b>0.26</b> | <b>4.54</b>  | <b>&lt;.001</b> | Female: -1.81, [-2.31, -1.30]<br>Male: -0.52, [-0.97, -0.08] |
|                                          | <b>EC</b>  | <b>-1.81</b> | <b>0.26</b> | <b>-7.01</b> | <b>&lt;.001</b> |                                                              |
|                                          | <b>Sex</b> | <b>-1.15</b> | <b>0.36</b> | <b>-3.17</b> | <b>.002</b>     | Female - Male: -1.29<br>z = -3.74, p < .001                  |
|                                          | DU*Sex     | 0.15         | 0.26        | 0.59         | .553            |                                                              |
|                                          | EC*Sex     | <b>1.29</b>  | <b>0.34</b> | <b>3.74</b>  | <b>&lt;.001</b> |                                                              |
| <b>Opioid (N = 122)</b>                  | <b>DU</b>  | <b>0.71</b>  | <b>0.24</b> | <b>2.94</b>  | <b>.003</b>     | Female: -2.20, [-3.00, -1.40]<br>Male: -0.70, [-1.27, -0.13] |
|                                          | <b>EC</b>  | <b>-2.20</b> | <b>0.41</b> | <b>-5.38</b> | <b>&lt;.001</b> |                                                              |
|                                          | <b>Sex</b> | <b>-0.97</b> | <b>0.47</b> | <b>-2.06</b> | <b>.039</b>     | Female - Male: -1.5<br>z = -2.99, p = .003                   |
|                                          | DU*Sex     | 0.27         | 0.34        | 0.78         | .434            |                                                              |
|                                          | EC*Sex     | <b>1.50</b>  | <b>0.50</b> | <b>2.99</b>  | <b>.003</b>     |                                                              |
| <b>Alcohol (N = 118)</b>                 | <b>DU</b>  | <b>0.89</b>  | <b>0.28</b> | <b>3.15</b>  | <b>.002</b>     | Female: -2.22, [-3.11, -1.34]<br>Male: -0.93, [-1.50, -0.35] |
|                                          | <b>EC</b>  | <b>-2.22</b> | <b>0.45</b> | <b>-4.92</b> | <b>&lt;.001</b> |                                                              |
|                                          | <b>Sex</b> | <b>-0.05</b> | <b>0.50</b> | <b>-0.11</b> | <b>.913</b>     | Female - Male: -1.3<br>z = -2.41, p = .016                   |
|                                          | DU*Sex     | 0.01         | 0.35        | 0.04         | .969            |                                                              |
|                                          | EC*Sex     | <b>1.30</b>  | <b>0.54</b> | <b>2.41</b>  | <b>.016</b>     |                                                              |
| <b>Cannabis (N = 158)</b>                | <b>DU</b>  | <b>0.54</b>  | <b>0.21</b> | <b>2.57</b>  | <b>.010</b>     | Female: -1.87, [-2.50, -1.23]<br>Male: -0.39, [-0.86, -0.07] |
|                                          | <b>EC</b>  | <b>-1.87</b> | <b>0.32</b> | <b>-5.77</b> | <b>&lt;.001</b> |                                                              |
|                                          | <b>Sex</b> | <b>-0.83</b> | <b>0.40</b> | <b>-2.08</b> | <b>.037</b>     | Female - Male: -1.47<br>z = -3.68, p < .001                  |
|                                          | DU*Sex     | 0.13         | 0.29        | 0.44         | .663            |                                                              |
|                                          | EC*Sex     | <b>1.47</b>  | <b>0.40</b> | <b>3.68</b>  | <b>&lt;.001</b> |                                                              |
| <b>Sedative (N = 84)</b>                 | <b>DU</b>  | <b>0.64</b>  | <b>0.25</b> | <b>2.57</b>  | <b>.010</b>     | Non-significant                                              |
|                                          | <b>EC</b>  | <b>-2.22</b> | <b>0.42</b> | <b>-5.27</b> | <b>&lt;.001</b> |                                                              |
|                                          | <b>Sex</b> | <b>-1.41</b> | <b>0.53</b> | <b>-2.65</b> | <b>.008</b>     |                                                              |
|                                          | DU*Sex     | 0.52         | 0.40        | 1.30         | .192            |                                                              |
|                                          | EC*Sex     | 0.87         | 0.60        | 1.46         | .143            |                                                              |
| <b>Hallucinogens (N = 14)</b>            | <b>DU</b>  | <b>1.72</b>  | <b>0.69</b> | <b>2.48</b>  | <b>.013</b>     | Non-significant                                              |
|                                          | <b>EC</b>  | <b>-2.24</b> | <b>0.92</b> | <b>-2.43</b> | <b>.015</b>     |                                                              |
|                                          | <b>Sex</b> | <b>-0.34</b> | <b>1.62</b> | <b>-0.21</b> | <b>.832</b>     |                                                              |
|                                          | DU*Sex     | 0.26         | 0.95        | 0.27         | .787            |                                                              |
|                                          | EC*Sex     | 1.07         | 1.20        | 0.89         | .373            |                                                              |
| <b>Affective Disorders (within SUDs)</b> |            |              |             |              |                 |                                                              |
| <b>MDD (N = 193)</b>                     | <b>DU</b>  | <b>0.53</b>  | <b>0.19</b> | <b>2.86</b>  | <b>.004</b>     | Female: -1.74, [-2.30, -1.18]<br>Male: -0.50, [-0.99, -0.02] |
|                                          | <b>EC</b>  | <b>-1.74</b> | <b>0.29</b> | <b>-6.10</b> | <b>&lt;.001</b> |                                                              |
|                                          | <b>Sex</b> | <b>-1.03</b> | <b>0.39</b> | <b>-2.66</b> | <b>.008</b>     | Female - Male: -1.24<br>z = -3.28, p = .001                  |
|                                          | DU*Sex     | 0.23         | 0.28        | 0.85         | .398            |                                                              |
|                                          | EC*Sex     | <b>1.24</b>  | <b>0.38</b> | <b>3.28</b>  | <b>.001</b>     |                                                              |
| <b>GAD (N = 62)</b>                      | <b>DU</b>  | <b>0.50</b>  | <b>0.27</b> | <b>1.87</b>  | <b>.061</b>     | Female: -2.18, [-3.07, -1.29]<br>Male: -0.38, [-1.16, -0.39] |
|                                          | <b>EC</b>  | <b>-2.18</b> | <b>0.45</b> | <b>-4.79</b> | <b>&lt;.001</b> |                                                              |
|                                          | <b>Sex</b> | <b>-1.45</b> | <b>0.54</b> | <b>-2.67</b> | <b>.008</b>     | Female - Male: -1.79<br>z = -2.98, p = .003                  |
|                                          | DU*Sex     | 0.04         | 0.39        | 0.10         | .920            |                                                              |
|                                          | EC*Sex     | <b>1.79</b>  | <b>0.60</b> | <b>2.98</b>  | <b>.003</b>     |                                                              |
| <b>Social Anxiety (N = 53)</b>           | <b>DU</b>  | <b>0.51</b>  | <b>0.27</b> | <b>1.89</b>  | <b>.059</b>     | Female: -1.52, [-2.28, -0.76]<br>Male: -0.25, [-0.95, -0.46] |
|                                          | <b>EC</b>  | <b>-1.52</b> | <b>0.39</b> | <b>-3.91</b> | <b>&lt;.001</b> |                                                              |
|                                          | <b>Sex</b> | <b>-0.74</b> | <b>0.55</b> | <b>-1.35</b> | <b>.178</b>     | Female - Male: -1.27                                         |
|                                          | DU*Sex     | -0.17        | 0.41        | -0.42        | .676            |                                                              |

Appendix 1 to Smith R, Lavalley CA, Taylor S, et al. Elevated decision uncertainty and reduced avoidance drives in depression, anxiety and substance use disorders during approach–avoidance conflict: a replication study. *J Psychiatry Neurosci* 2023. doi: 10.1503/jpn.220226. Copyright © 2023 The Author(s) or their employer(s). To receive this resource in an accessible format, please contact us at cmajgroup@cmaj.ca. Online appendices are unedited and posted as supplied by the authors.

|                       |               |              |             |              |                 |                                                             |
|-----------------------|---------------|--------------|-------------|--------------|-----------------|-------------------------------------------------------------|
|                       | <b>EC*Sex</b> | <b>1.27</b>  | <b>0.53</b> | <b>2.41</b>  | <b>.016</b>     | $z = -2.41, p = .016$                                       |
| <b>Panic (N = 31)</b> | <b>DU</b>     | <b>0.79</b>  | <b>0.37</b> | <b>2.17</b>  | <b>.030</b>     | Non-significant                                             |
|                       | <b>EC</b>     | <b>-1.37</b> | <b>0.48</b> | <b>-2.87</b> | <b>.004</b>     |                                                             |
|                       | Sex           | -0.75        | 0.78        | -0.96        | .336            |                                                             |
|                       | DU*Sex        | 0.12         | 0.52        | 0.23         | .818            |                                                             |
|                       | EC*Sex        | 1.25         | 0.64        | 1.95         | .051            |                                                             |
| <b>PTSD (N = 43)</b>  | <b>DU</b>     | <b>0.81</b>  | <b>0.30</b> | <b>2.70</b>  | <b>.007</b>     | Female: -1.65, [-2.53, -0.77]<br>Male: -0.21, [-0.94, 0.51] |
|                       | <b>EC</b>     | <b>-1.65</b> | <b>0.45</b> | <b>-3.67</b> | <b>&lt;.001</b> |                                                             |
|                       | Sex           | -1.08        | 0.67        | -1.61        | .108            | Female - Male: -1.44<br>$z = -2.47, p = .014$               |
|                       | DU*Sex        | -0.00        | 0.45        | -0.01        | .992            |                                                             |
|                       | <b>EC*Sex</b> | <b>1.44</b>  | <b>0.58</b> | <b>2.47</b>  | <b>.013</b>     |                                                             |

\* Note that these estimates reflect the change in log-odds of belonging to the target group.

**Table S11. Logistic regressions in SUDS (N = 334) predicting each specific disorder compared to all other disorders in combined samples**

| Substance Use Disorders        |            |              |             |              |                 |
|--------------------------------|------------|--------------|-------------|--------------|-----------------|
| Disorder                       | Effect     | Estimate*    | SE          | z            | p               |
| <b>Only Stimulant (N = 62)</b> | DU         | 0.01         | 0.19        | 0.03         | .978            |
|                                | EC         | 0.34         | 0.36        | 1.33         | .183            |
|                                | <b>Sex</b> | <b>-1.92</b> | <b>0.72</b> | <b>-2.67</b> | <b>.008</b>     |
|                                | DU*Sex     | 0.39         | 0.42        | 0.93         | .354            |
|                                | EC*Sex     | -0.33        | 0.53        | -0.63        | .532            |
| <b>Stimulant (N = 278)</b>     | DU         | -0.13        | 0.23        | -0.54        | .588            |
|                                | EC         | -0.43        | 0.31        | -1.42        | .156            |
|                                | Sex        | -0.26        | 0.55        | -0.48        | .629            |
|                                | DU*Sex     | -0.15        | 0.34        | -0.43        | .666            |
|                                | EC*Sex     | 0.60         | 0.45        | 1.34         | .179            |
| <b>Opioid (N = 122)</b>        | DU         | 0.08         | 0.19        | 0.41         | .684            |
|                                | EC         | -0.27        | 0.26        | -1.02        | .308            |
|                                | Sex        | 0.62         | 0.40        | 1.55         | .120            |
|                                | DU*Sex     | -0.01        | 0.26        | -0.05        | .960            |
|                                | EC*Sex     | 0.14         | 0.36        | 0.39         | .700            |
| <b>Alcohol (N = 118)</b>       | DU         | 0.29         | 0.21        | 1.38         | .167            |
|                                | EC         | -0.44        | 0.30        | -1.45        | .147            |
|                                | <b>Sex</b> | <b>1.69</b>  | <b>0.43</b> | <b>3.89</b>  | <b>&lt;.001</b> |
|                                | DU*Sex     | -0.08        | 0.29        | -0.29        | .769            |
|                                | EC*Sex     | -0.16        | 0.40        | -0.41        | .684            |
| <b>Cannabis (N = 158)</b>      | DU         | -0.22        | 0.17        | -1.26        | .207            |
|                                | EC         | -0.21        | 0.24        | -0.88        | .378            |
|                                | Sex        | 0.63         | 0.40        | 1.59         | .113            |
|                                | DU*Sex     | -0.18        | 0.26        | -0.69        | .491            |
|                                | EC*Sex     | 0.61         | 0.35        | 1.72         | .085            |
| <b>Sedative (N = 84)</b>       | DU         | 0.02         | 0.20        | 0.09         | .926            |
|                                | EC         | -0.42        | 0.29        | -1.48        | .139            |
|                                | Sex        | -0.08        | 0.45        | -0.19        | .853            |
|                                | DU*Sex     | 0.15         | 0.30        | 0.50         | .614            |
|                                | EC*Sex     | -0.25        | 0.43        | -0.58        | .563            |
| <b>Hallucinogens (N = 14)</b>  | DU         | 1.10         | 0.62        | 1.78         | .076            |
|                                | EC         | -0.65        | 0.79        | -0.83        | .408            |
|                                | Sex        | 1.18         | 1.39        | 0.85         | .396            |
|                                | DU*Sex     | -0.45        | 0.78        | -0.58        | .561            |
|                                | EC*Sex     | 0.46         | 0.97        | 0.47         | .640            |
| Affective Disorders            |            |              |             |              |                 |
| <b>MDD (N = 193)</b>           | DU         | -0.26        | 0.17        | -1.52        | .128            |



Appendix 1 to Smith R, Lavalley CA, Taylor S, et al. Elevated decision uncertainty and reduced avoidance drives in depression, anxiety and substance use disorders during approach–avoidance conflict: a replication study. *J Psychiatry Neurosci* 2023. doi: 10.1503/jpn.220226. Copyright © 2023 The Author(s) or their employer(s). To receive this resource in an accessible format, please contact us at cmajgroup@cmaj.ca. Online appendices are unedited and posted as supplied by the authors.

|                                |        |       |      |       |      |
|--------------------------------|--------|-------|------|-------|------|
|                                | EC     | 0.11  | 0.24 | 0.46  | .648 |
|                                | Sex    | 0.30  | 0.40 | 0.76  | .448 |
|                                | DU*Sex | 0.03  | 0.26 | 0.12  | .903 |
|                                | EC*Sex | 0.13  | 0.35 | 0.37  | .709 |
| <b>GAD (N = 62)</b>            | DU     | -0.15 | 0.21 | -0.73 | .467 |
|                                | EC     | -0.23 | 0.30 | -0.76 | .446 |
|                                | Sex    | -0.28 | 0.48 | -0.59 | .557 |
|                                | DU*Sex | -0.18 | 0.33 | -0.54 | .591 |
|                                | EC*Sex | 0.52  | 0.44 | 1.19  | .236 |
| <b>Social Anxiety (N = 53)</b> | DU     | -0.17 | 0.23 | -0.77 | .443 |
|                                | EC     | 0.29  | 0.31 | 0.92  | .357 |
|                                | Sex    | 0.51  | 0.49 | 1.04  | .299 |
|                                | DU*Sex | -0.47 | 0.35 | -1.35 | .176 |
|                                | EC*Sex | 0.11  | 0.45 | 0.25  | .799 |
| <b>Panic (N = 31)</b>          | DU     | 0.08  | 0.31 | 0.26  | .792 |
|                                | EC     | 0.33  | 0.41 | 0.80  | .425 |
|                                | Sex    | 0.33  | 0.69 | 0.48  | .631 |
|                                | DU*Sex | -0.14 | 0.42 | -0.32 | .746 |
|                                | EC*Sex | 0.28  | 0.55 | 0.51  | .614 |
| <b>PTSD (N = 43)</b>           | DU     | 0.16  | 0.25 | 0.62  | .534 |
|                                | EC     | 0.20  | 0.34 | 0.60  | .552 |
|                                | Sex    | 0.19  | 0.59 | 0.32  | .747 |
|                                | DU*Sex | -0.31 | 0.37 | -0.83 | .408 |
|                                | EC*Sex | 0.25  | 0.48 | 0.51  | .610 |

\* Note that these estimates reflect the change in log-odds of belonging to the target group.

**Table S12. Logistic regressions in DEP/ANX group predicting the presence of specific disorders compared to HCs (N = 156) in combined samples**

| Affective Disorders            |        |              |             |              |                 |                                                                                                                |
|--------------------------------|--------|--------------|-------------|--------------|-----------------|----------------------------------------------------------------------------------------------------------------|
| Disorder                       | Effect | Estimate*    | SE          | z            | p               | EC*Sex Interaction: B [CI]                                                                                     |
| <b>Anxious MDD (N = 298)</b>   | DU     | <b>0.28</b>  | <b>0.14</b> | <b>1.96</b>  | <b>.050</b>     | Non-significant                                                                                                |
|                                | EC     | <b>-0.59</b> | <b>0.17</b> | <b>-3.51</b> | <b>&lt;.001</b> |                                                                                                                |
|                                | Sex    | <b>-1.33</b> | <b>0.35</b> | <b>-3.78</b> | <b>&lt;.001</b> |                                                                                                                |
|                                | DU*Sex | 0.17         | 0.26        | 0.66         | .508            |                                                                                                                |
|                                | EC*Sex | 0.19         | 0.30        | 0.64         | .525            |                                                                                                                |
| <b>Only MDD (N = 128)</b>      | DU     | 0.26         | 0.17        | 1.51         | .131            | Female: -0.75, [-1.17, -0.33]<br>Male: -0.06, [-0.54, 0.57]<br><br>Female - Male: -0.81<br>z = -2.40, p = .016 |
|                                | EC     | <b>-0.75</b> | <b>0.21</b> | <b>-3.50</b> | <b>&lt;.001</b> |                                                                                                                |
|                                | Sex    | <b>-1.16</b> | <b>0.41</b> | <b>-2.80</b> | <b>.005</b>     |                                                                                                                |
|                                | DU*Sex | -0.11        | 0.29        | -0.37        | .713            |                                                                                                                |
|                                | EC*Sex | <b>0.81</b>  | <b>0.34</b> | <b>2.40</b>  | <b>.016</b>     |                                                                                                                |
| <b>MDD Inclusive (N = 426)</b> | DU     | <b>0.29</b>  | <b>0.14</b> | <b>2.12</b>  | <b>.034</b>     | Non-significant                                                                                                |
|                                | EC     | <b>-0.64</b> | <b>0.16</b> | <b>-3.97</b> | <b>&lt;.001</b> |                                                                                                                |
|                                | Sex    | <b>-1.25</b> | <b>0.32</b> | <b>-3.86</b> | <b>&lt;.001</b> |                                                                                                                |
|                                | DU*Sex | 0.03         | 0.23        | 0.12         | .903            |                                                                                                                |
|                                | EC*Sex | 0.45         | 0.26        | 1.70         | .090            |                                                                                                                |
| <b>GAD Inclusive (N = 215)</b> | DU     | 0.22         | 0.15        | 1.46         | .143            | Non-significant                                                                                                |
|                                | EC     | <b>-0.53</b> | <b>0.17</b> | <b>-3.07</b> | <b>.002</b>     |                                                                                                                |
|                                | Sex    | <b>-1.60</b> | <b>0.39</b> | <b>-4.11</b> | <b>&lt;.001</b> |                                                                                                                |
|                                | DU*Sex | 0.19         | 0.28        | 0.66         | .510            |                                                                                                                |
|                                | EC*Sex | 0.25         | 0.33        | 0.77         | .442            |                                                                                                                |
| <b>Only GAD (N = 14)</b>       | DU     | -0.05        | 0.36        | -0.15        | .882            | Non-significant                                                                                                |
|                                | EC     | -0.29        | 0.42        | -0.69        | .488            |                                                                                                                |
|                                | Sex    | <b>-3.04</b> | <b>1.53</b> | <b>-1.99</b> | <b>.047</b>     |                                                                                                                |

Appendix 1 to Smith R, Lavalley CA, Taylor S, et al. Elevated decision uncertainty and reduced avoidance drives in depression, anxiety and substance use disorders during approach–avoidance conflict: a replication study. *J Psychiatry Neurosci* 2023. doi: 10.1503/jpn.220226. Copyright © 2023 The Author(s) or their employer(s). To receive this resource in an accessible format, please contact us at cmajgroup@cmaj.ca. Online appendices are unedited and posted as supplied by the authors.

|                                 |            |              |             |              |                 |                 |
|---------------------------------|------------|--------------|-------------|--------------|-----------------|-----------------|
| <b>Social Anxiety (N = 111)</b> | DU*Sex     | 1.34         | 0.82        | 1.62         | .105            | Non-significant |
|                                 | EC*Sex     | 0.30         | 0.98        | 0.30         | .761            |                 |
|                                 | DU         | -0.10        | 0.18        | -0.56        | .576            |                 |
|                                 | <b>EC</b>  | <b>-0.41</b> | <b>0.21</b> | <b>-1.99</b> | <b>.046</b>     |                 |
|                                 | <b>Sex</b> | <b>-1.03</b> | <b>0.42</b> | <b>-2.44</b> | <b>.015</b>     |                 |
|                                 | DU*Sex     | 0.34         | 0.32        | 1.08         | .280            |                 |
| <b>Panic (N = 82)</b>           | EC*Sex     | 0.06         | 0.38        | 0.15         | .879            | Non-significant |
|                                 | DU         | 0.22         | 0.19        | 1.18         | .239            |                 |
|                                 | <b>EC</b>  | <b>-0.72</b> | <b>0.22</b> | <b>-3.23</b> | <b>.001</b>     |                 |
|                                 | <b>Sex</b> | <b>-1.85</b> | <b>0.53</b> | <b>-3.49</b> | <b>&lt;.001</b> |                 |
|                                 | DU*Sex     | 0.46         | 0.41        | 1.12         | .263            |                 |
|                                 | EC*Sex     | 0.05         | 0.51        | 0.10         | .920            |                 |
| <b>PTSD (N = 80)</b>            | DU         | 0.35         | 0.19        | 1.81         | .071            | Non-significant |
|                                 | <b>EC</b>  | <b>-0.51</b> | <b>0.23</b> | <b>-2.23</b> | <b>.026</b>     |                 |
|                                 | Sex        | -0.94        | 0.50        | -1.87        | .062            |                 |
|                                 | DU*Sex     | 0.00         | 0.38        | 0.00         | .999            |                 |
|                                 | EC*Sex     | -0.03        | 0.47        | -0.07        | .948            |                 |

\* Note that these estimates reflect the change in log-odds of belonging to the target group.

**Table S13. Logistic regressions in DEP/ANX group (N = 468) predicting each specific disorder compared to all other disorders in combined samples**

| <b>Affective Disorders</b>          |           |              |             |              |             |
|-------------------------------------|-----------|--------------|-------------|--------------|-------------|
| Disorder                            | Effect    | Estimate*    | SE          | z            | p           |
| <b>Anxious Depression (N = 298)</b> | DU        | 0.01         | 0.13        | 0.09         | .928        |
|                                     | EC        | 0.05         | 0.15        | 0.33         | .744        |
|                                     | Sex       | -0.28        | 0.34        | -0.83        | .405        |
|                                     | DU*Sex    | 0.22         | 0.24        | 0.92         | .356        |
|                                     | EC*Sex    | -0.33        | 0.29        | -1.15        | .249        |
| <b>Only MDD (N = 128)</b>           | DU        | 0.00         | 0.14        | -0.03        | .976        |
|                                     | EC        | -0.16        | 0.17        | -0.93        | .351        |
|                                     | Sex       | 0.16         | 0.36        | 0.44         | .661        |
|                                     | DU*Sex    | -0.21        | 0.26        | -0.81        | .419        |
|                                     | EC*Sex    | 0.51         | 0.30        | 1.68         | .094        |
| <b>MDD Inclusive (N = 426)</b>      | DU        | 0.02         | 0.21        | 0.097        | .922        |
|                                     | EC        | -0.22        | 0.25        | -0.88        | .377        |
|                                     | Sex       | -0.40        | 0.56        | -0.70        | .483        |
|                                     | DU*Sex    | 0.11         | 0.41        | 0.26         | .795        |
|                                     | EC*Sex    | 0.35         | 0.49        | 0.70         | .482        |
| <b>GAD Inclusive (N = 215)</b>      | DU        | -0.11        | 0.12        | -0.90        | .370        |
|                                     | EC        | 0.14         | 0.15        | 0.98         | .329        |
|                                     | Sex       | -0.66        | 0.34        | -1.93        | .054        |
|                                     | DU*Sex    | 0.22         | 0.24        | 0.93         | .354        |
|                                     | EC*Sex    | -0.19        | 0.29        | -0.67        | .500        |
| <b>Only GAD (N = 14)</b>            | DU        | -0.30        | 0.35        | -0.9         | .380        |
|                                     | EC        | 0.37         | 0.40        | 0.91         | .361        |
|                                     | Sex       | -1.68        | 1.47        | -1.14        | .254        |
|                                     | DU*Sex    | 1.21         | 0.81        | 1.50         | .133        |
|                                     | EC*Sex    | -0.17        | 0.86        | -0.20        | .845        |
| <b>Social Anxiety (N = 111)</b>     | <b>DU</b> | <b>-0.47</b> | <b>0.15</b> | <b>-3.11</b> | <b>.002</b> |
|                                     | EC        | 0.33         | 0.18        | 1.85         | .064        |
|                                     | Sex       | 0.32         | 0.37        | 0.88         | .379        |
|                                     | DU*Sex    | 0.34         | 0.27        | 1.26         | .208        |
|                                     | EC*Sex    | -0.46        | 0.32        | -1.42        | .156        |

Appendix 1 to Smith R, Lavalley CA, Taylor S, et al. Elevated decision uncertainty and reduced avoidance drives in depression, anxiety and substance use disorders during approach–avoidance conflict: a replication study. *J Psychiatry Neurosci* 2023. doi: 10.1503/jpn.220226. Copyright © 2023 The Author(s) or their employer(s). To receive this resource in an accessible format, please contact us at cmajgroup@cmaj.ca. Online appendices are unedited and posted as supplied by the authors.

|                       |        |       |      |       |      |
|-----------------------|--------|-------|------|-------|------|
| <b>Panic (N = 82)</b> | DU     | -0.01 | 0.15 | -0.05 | .962 |
|                       | EC     | -0.19 | 0.19 | -0.99 | .322 |
|                       | Sex    | -0.69 | 0.48 | -1.46 | .146 |
|                       | DU*Sex | 0.27  | 0.34 | 0.80  | .423 |
|                       | EC*Sex | -0.13 | 0.42 | -0.31 | .759 |
| <b>PTSD (N = 80)</b>  | DU     | 0.07  | 0.16 | 0.47  | .639 |
|                       | EC     | 0.11  | 0.19 | 0.59  | .557 |
|                       | Sex    | 0.29  | 0.44 | 0.67  | .501 |
|                       | DU*Sex | -0.08 | 0.32 | -0.24 | .808 |
|                       | EC*Sex | -0.39 | 0.39 | -1.00 | .316 |

\* Note that these estimates reflect the change in log-odds of belonging to the target group.

Appendix 1 to Smith R, Lavalley CA, Taylor S, et al. Elevated decision uncertainty and reduced avoidance drives in depression, anxiety and substance use disorders during approach–avoidance conflict: a replication study. *J Psychiatry Neurosci* 2023. doi: 10.1503/jpn.220226. Copyright © 2023 The Author(s) or their employer(s). To receive this resource in an accessible format, please contact us at cmajgroup@cmaj.ca. Online appendices are unedited and posted as supplied by the authors.

## Supplementary Figures

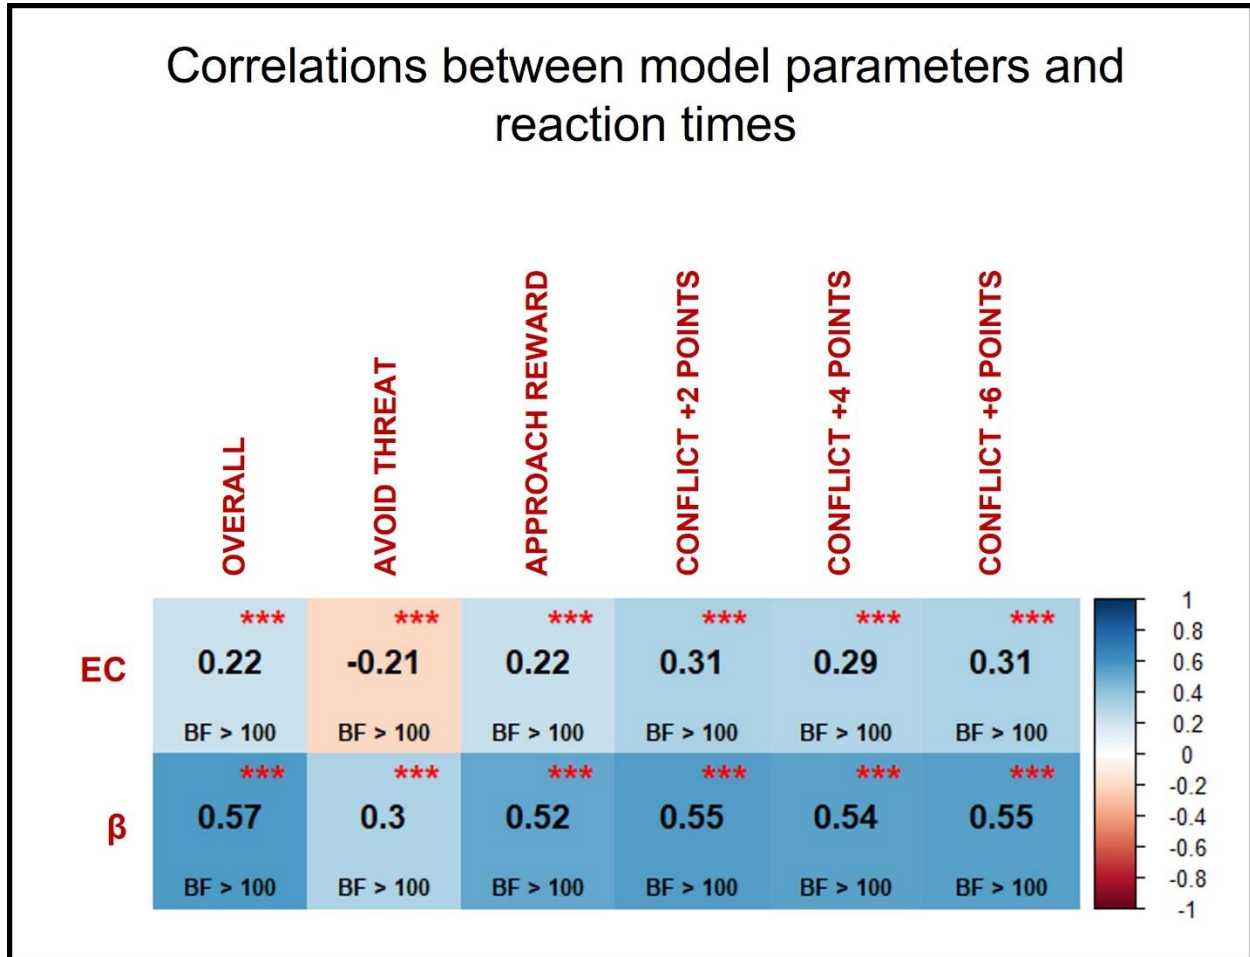

**Figure S1.** Pearson correlations between model parameter estimates and response times (per task condition). Note that the negative correlation with EC in the AVOID THREAT condition is expected, as more confident avoidance would be expected in the absence of any points on offer.

Appendix 1 to Smith R, Lavalley CA, Taylor S, et al. Elevated decision uncertainty and reduced avoidance drives in depression, anxiety and substance use disorders during approach–avoidance conflict: a replication study. *J Psychiatry Neurosci* 2023. doi: 10.1503/jpn.220226. Copyright © 2023 The Author(s) or their employer(s). To receive this resource in an accessible format, please contact us at cmajgroup@cmaj.ca. Online appendices are unedited and posted as supplied by the authors.

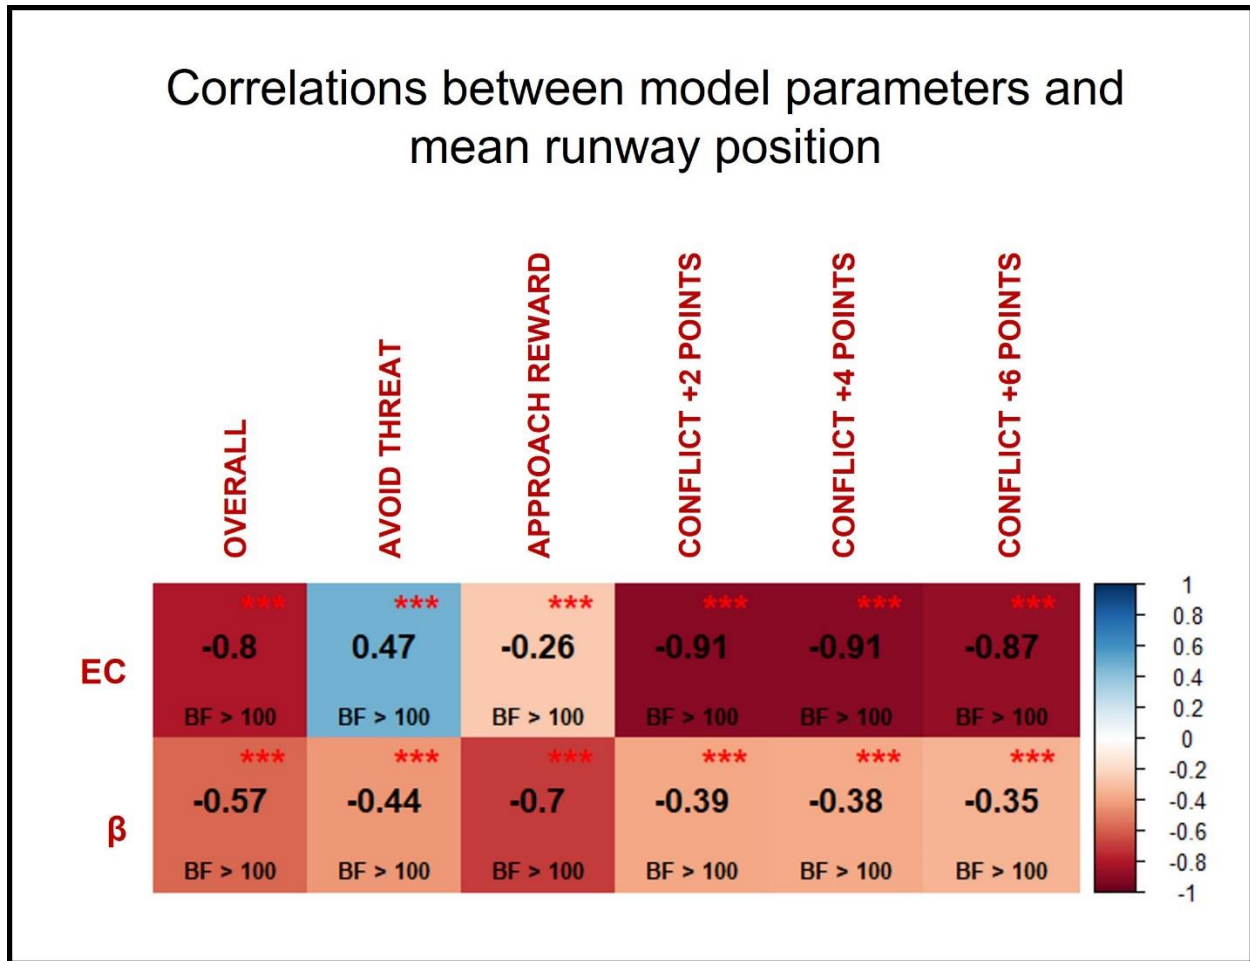

**Figure S2.** Pearson correlations between model parameter estimates and mean chosen runway position (per task condition). Note that the positive correlation with EC in the AVOID THREAT condition is expected, as higher runway position values always indicate movement toward the more positive stimulus in a given condition, which in this case means movement away from the negative stimulus since no points are on offer (whereas in all other conditions it means movement toward the points).

Appendix 1 to Smith R, Lavalley CA, Taylor S, et al. Elevated decision uncertainty and reduced avoidance drives in depression, anxiety and substance use disorders during approach–avoidance conflict: a replication study. *J Psychiatry Neurosci* 2023. doi: 10.1503/jpn.220226. Copyright © 2023 The Author(s) or their employer(s). To receive this resource in an accessible format, please contact us at cmajgroup@cmaj.ca. Online appendices are unedited and posted as supplied by the authors.

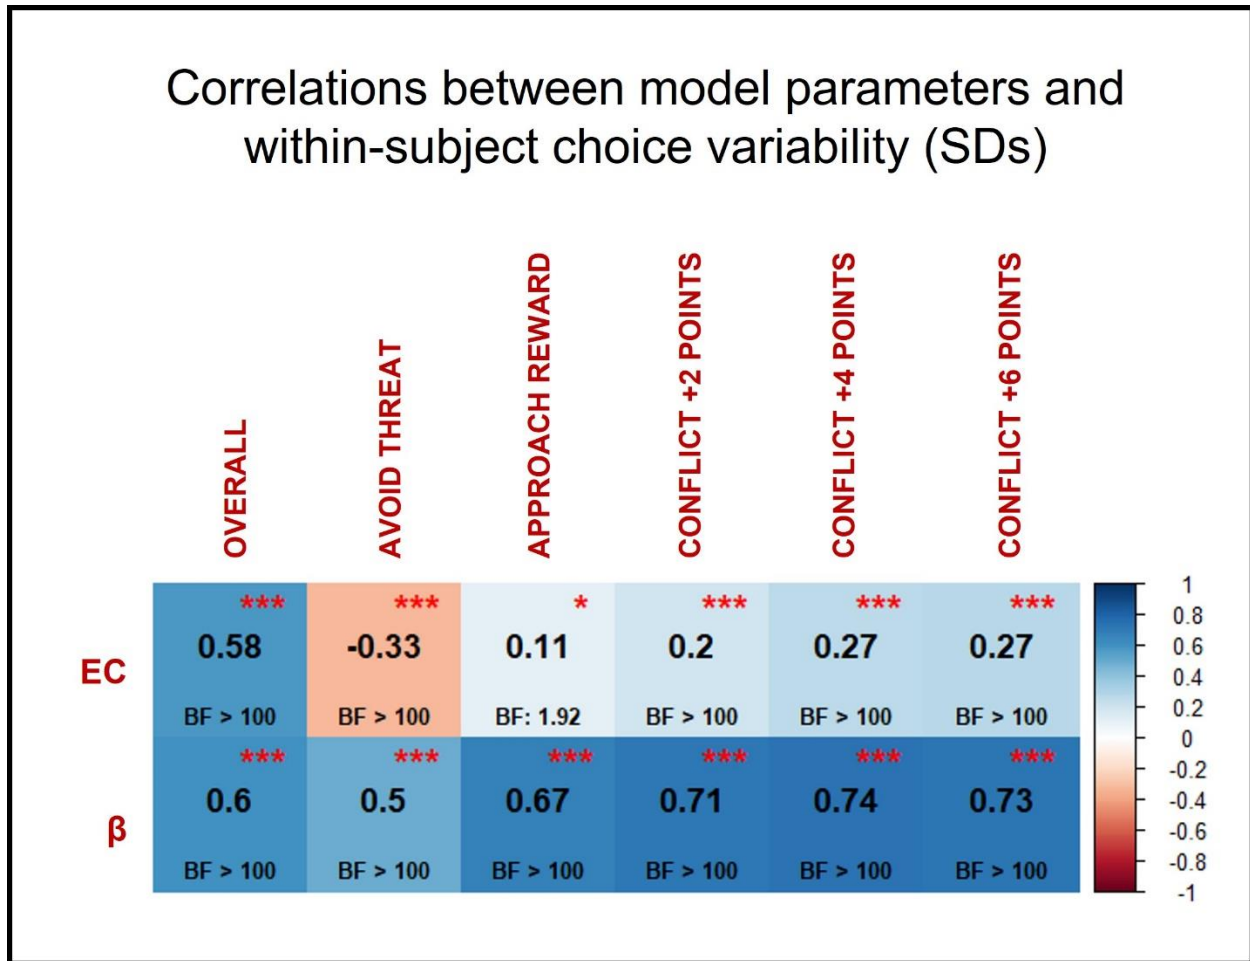

**Figure S3.** Pearson correlations between model parameter estimates and SD in chosen runway position (per task condition). Note that the negative correlation with EC in the AVOID THREAT condition is expected, as more confident avoidance (less variability) would be expected in the absence of any points on offer.

Appendix 1 to Smith R, Lavalley CA, Taylor S, et al. Elevated decision uncertainty and reduced avoidance drives in depression, anxiety and substance use disorders during approach–avoidance conflict: a replication study. *J Psychiatry Neurosci* 2023. doi: 10.1503/jpn.220226. Copyright © 2023 The Author(s) or their employer(s). To receive this resource in an accessible format, please contact us at cmajgroup@cmaj.ca. Online appendices are unedited and posted as supplied by the authors.

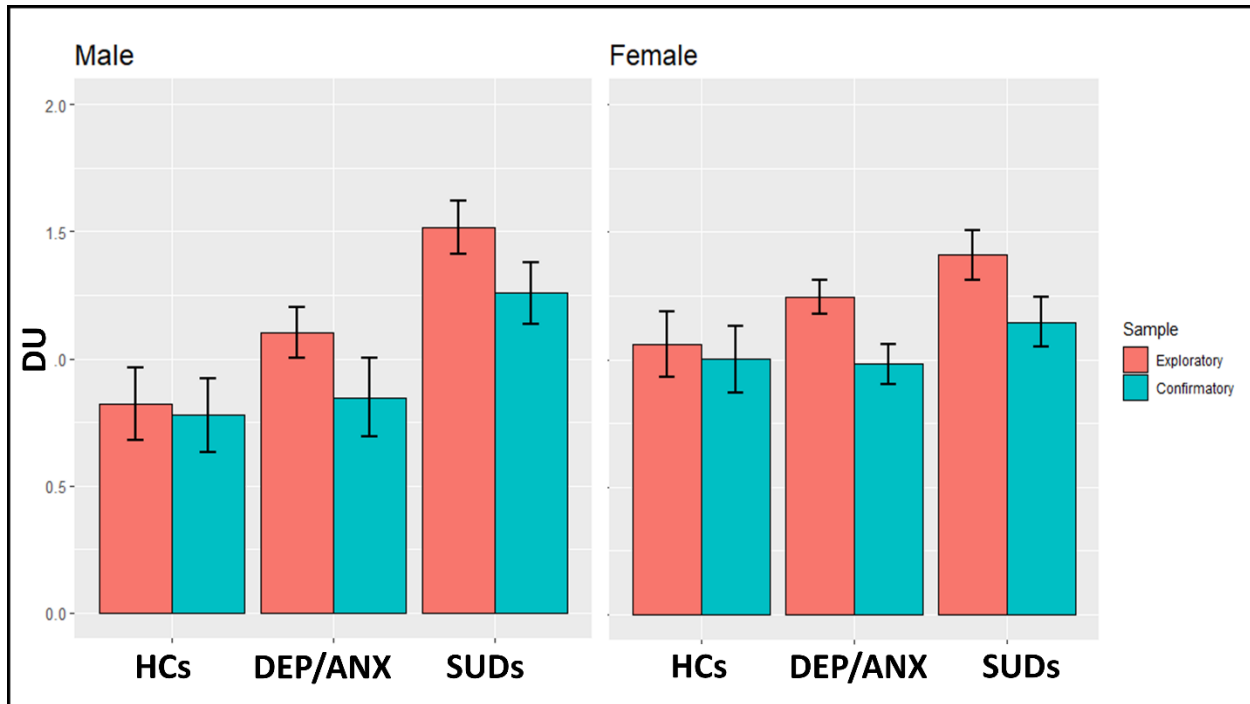

**Figure S4.** Comparison of results for the DU parameter (Mean/SE) in our previous exploratory sample<sup>6</sup> and the current sample when separated by clinical group and sex.

Appendix 1 to Smith R, Lavalley CA, Taylor S, et al. Elevated decision uncertainty and reduced avoidance drives in depression, anxiety and substance use disorders during approach–avoidance conflict: a replication study. *J Psychiatry Neurosci* 2023. doi: 10.1503/jpn.220226. Copyright © 2023 The Author(s) or their employer(s). To receive this resource in an accessible format, please contact us at cmajgroup@cmaj.ca. Online appendices are unedited and posted as supplied by the authors.

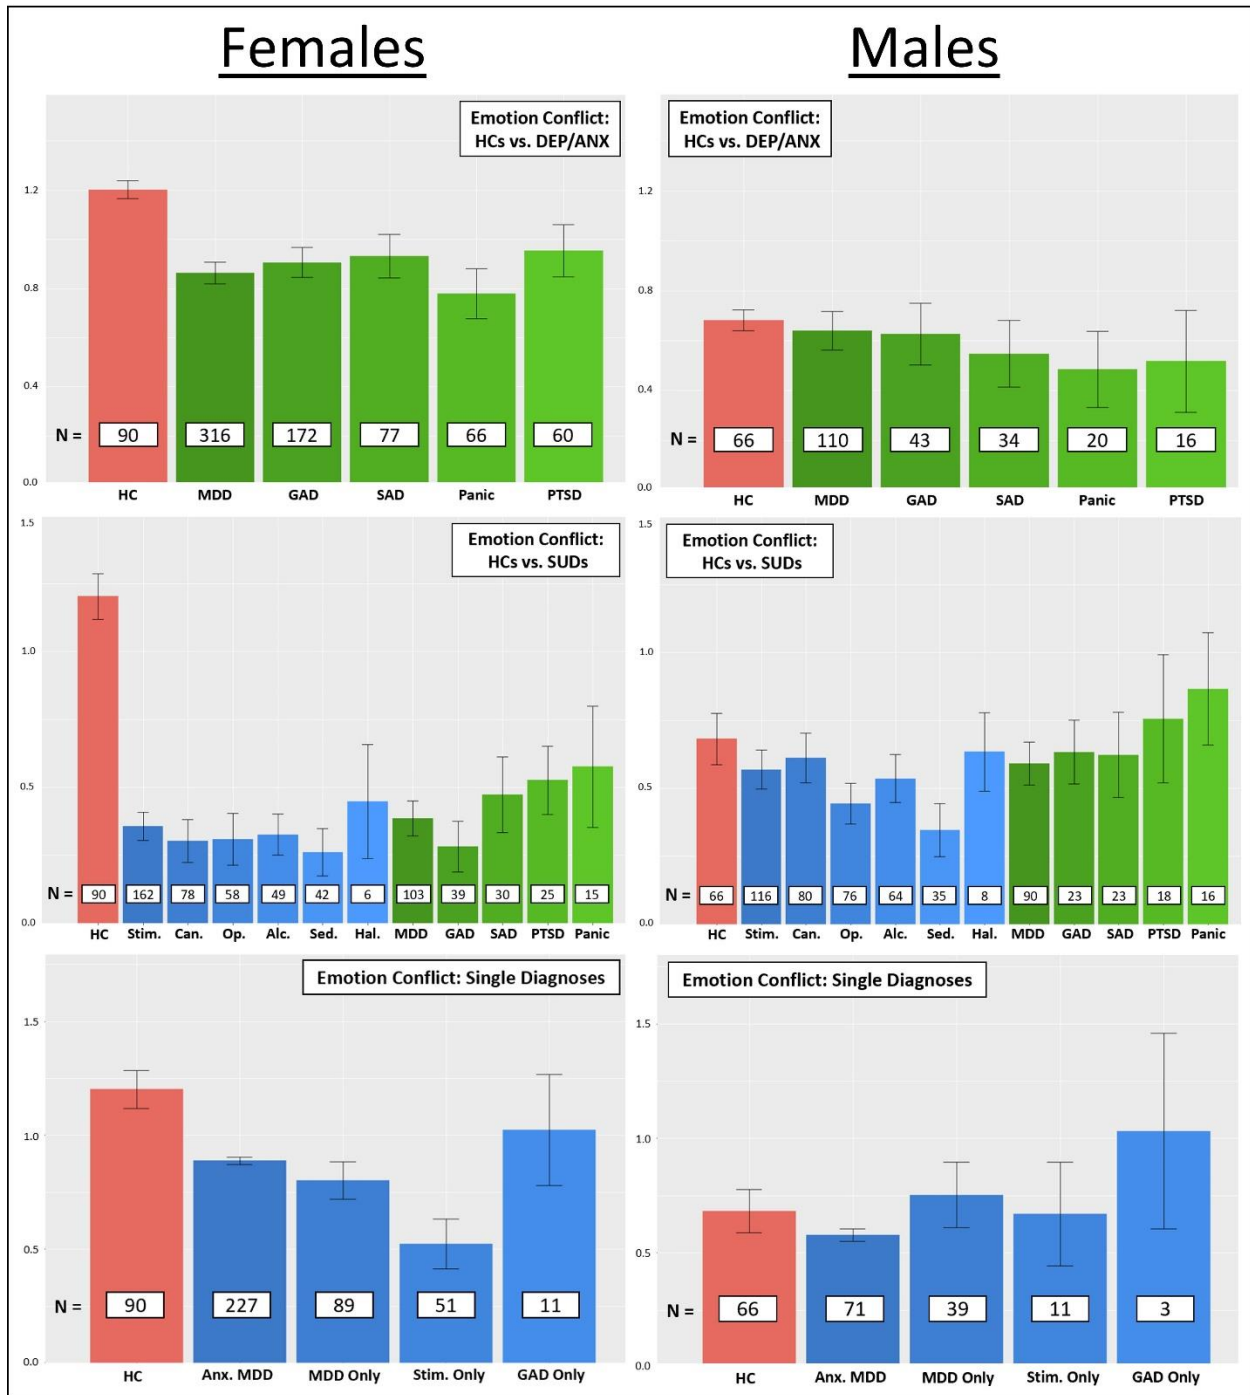

**Figure S5.** Comparison of EC values within HCs and subsets of individuals with specific SUDs/affective disorders within the combined exploratory and confirmatory samples when separated by sex (sample size per group is indicated within each bar). See **Table S10-S13** for information about sex by parameter interactions. Stim. Only = stimulant use disorders without co-morbidities, Can. = cannabis use disorders, Op. = opioid use disorders, Alc. = alcohol use disorders, Sed. = sedative use disorders, Hal. = hallucinogen use disorders, SAD = social anxiety disorder, PTSD = post-traumatic stress disorders.



Appendix 1 to Smith R, Lavalley CA, Taylor S, et al. Elevated decision uncertainty and reduced avoidance drives in depression, anxiety and substance use disorders during approach–avoidance conflict: a replication study. *J Psychiatry Neurosci* 2023. doi: 10.1503/jpn.220226. Copyright © 2023 The Author(s) or their employer(s). To receive this resource in an accessible format, please contact us at cmajgroup@cmaj.ca. Online appendices are unedited and posted as supplied by the authors.

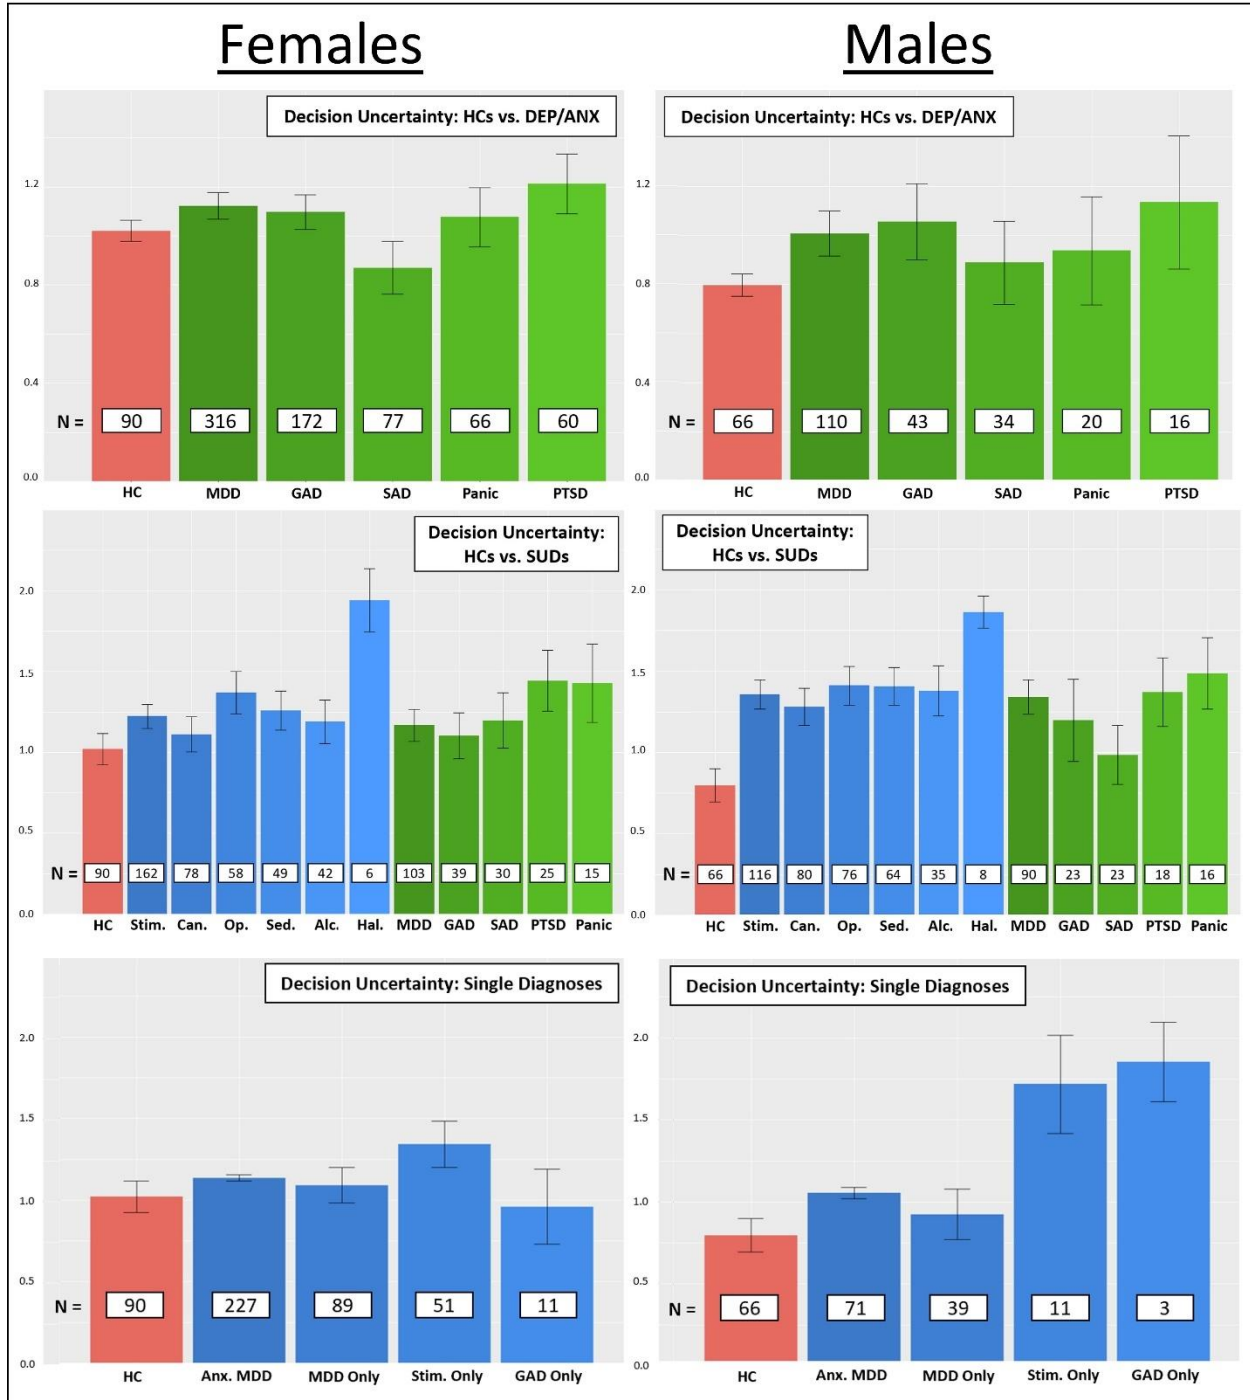

**Figure S6.** Comparison of DU values within HCs and subsets of individuals with specific SUDs/affective disorders within the combined exploratory and confirmatory samples when separated by sex (sample size per group is indicated within each bar). See **Table S10-S13** for information about sex by parameter interactions. Stim. Only = stimulant use disorders without co-morbidities, Can. = cannabis use disorders,

Appendix 1 to Smith R, Lavalley CA, Taylor S, et al. Elevated decision uncertainty and reduced avoidance drives in depression, anxiety and substance use disorders during approach–avoidance conflict: a replication study. *J Psychiatry Neurosci* 2023. doi: 10.1503/jpn.220226. Copyright © 2023 The Author(s) or their employer(s). To receive this resource in an accessible format, please contact us at cmajgroup@cmaj.ca. Online appendices are unedited and posted as supplied by the authors.

Op. = opioid use disorders, Alc. = alcohol use disorders, Sed. = sedative use disorders, Hal. = hallucinogen use disorders, SAD = social anxiety disorder, PTSD = post-traumatic stress disorders.

## **References**

1. Upperle RL, Melrose AJ, Francisco A, Paulus MP, Stein MB. Neural substrates of approach-avoidance conflict decision-making. *Hum Brain Mapp*. 2015;36(2):449-62. Epub 2014/09/17. doi: 10.1002/hbm.22639. PubMed PMID: 25224633; PMCID: PMC4300249.
2. Chrysiou EG, Gorey C, Upperle RL. Anodal transcranial direct current stimulation over right dorsolateral prefrontal cortex alters decision making during approach-avoidance conflict. *Soc Cogn Affect Neurosci*. 2017;12(3):468-75. Epub 2016/11/01. doi: 10.1093/scan/nsw140. PubMed PMID: 27694531; PMCID: PMC5390716.
3. Lang P, Bradley M, Cuthbert B. International affective picture system (IAPS): Affective ratings of pictures and instruction manual. Technical Report A-8.2008.
4. Lang P, Bradley M. International affective digitized sounds (IADS): Stimuli, instruction manual and affective ratings (Technical Report no. b-2)(Vol. 803). Gainsville; 1999.
5. Upperle RL, Sullivan S, Melrose AJ, Paulus MP, Stein MB. A reverse translational approach to quantify approach-avoidance conflict in humans. *Behav Brain Res*. 2011;225(2):455-63. Epub 2011/08/17. doi: 10.1016/j.bbr.2011.08.003. PubMed PMID: 21843556; PMCID: PMC3381365.
6. Smith R, Kirlic N, Stewart JL, Touthang J, Kuplicki R, Khalsa SS, Feinstein J, Paulus MP, Upperle RL. Greater decision uncertainty characterizes a transdiagnostic patient sample during approach-avoidance conflict: a computational modelling approach. *Journal of Psychiatry & Neuroscience*. 2021;46(1):E74-E87. Epub 2020/10/30. doi: 10.1503/jpn.200032. PubMed PMID: 33119490; PMCID: PMC7955838.
7. Cella D, Riley W, Stone A, Rothrock N, Reeve B, Yount S, Amtmann D, Bode R, Buysse D, Choi S, Cook K, Devellis R, DeWalt D, Fries JF, Gershon R, Hahn EA, Lai JS, Pilkonis P, Revicki D, Rose M, Weinfurt K, Hays R, Group PC. The Patient-Reported Outcomes Measurement Information System (PROMIS) developed and tested its first wave of adult self-reported health outcome item banks: 2005-2008. *J Clin Epidemiol*. 2010;63(11):1179-94. Epub 2010/08/06. doi: 10.1016/j.jclinepi.2010.04.011. PubMed PMID: 20685078; PMCID: PMC2965562.
8. Sandin B, Chorot P, McNally RJ. Anxiety sensitivity index: normative data and its differentiation from trait anxiety. *Behav Res Ther*. 2001;39(2):213-9. Epub 2001/01/12. doi: 10.1016/s0005-7967(00)00009-7. PubMed PMID: 11153974.
9. Smith R, Kirlic N, Stewart JL, Touthang J, Kuplicki R, McDermott TJ, Taylor S, Khalsa SS, Paulus MP, Upperle RL. Long-term stability of computational parameters during approach-avoidance conflict in a transdiagnostic psychiatric patient sample. *Scientific Reports*. 2021;11(1):11783. Epub 2021/06/05. doi: 10.1038/s41598-021-91308-x. PubMed PMID: 34083701; PMCID: PMC8175390.

Appendix 1 to Smith R, Lavalley CA, Taylor S, et al. Elevated decision uncertainty and reduced avoidance drives in depression, anxiety and substance use disorders during approach–avoidance conflict: a replication study. *J Psychiatry Neurosci* 2023. doi: 10.1503/jpn.220226. Copyright © 2023 The Author(s) or their employer(s). To receive this resource in an accessible format, please contact us at cmajgroup@cmaj.ca. Online appendices are unedited and posted as supplied by the authors.

## Supplementary Results 2:

### Full statistical results for all ANCOVA analyses including the subset of participants with available WRAT Reading scores

#### Main Effects

(see below for interactions)

|                   | Age                                                                                                                                                 | Sex                                                                                                                                                                 | Group                                                                                                                                                                                                                                                                                                                                                                                                                                                                                                                | WRAT                                                                                                                                              |
|-------------------|-----------------------------------------------------------------------------------------------------------------------------------------------------|---------------------------------------------------------------------------------------------------------------------------------------------------------------------|----------------------------------------------------------------------------------------------------------------------------------------------------------------------------------------------------------------------------------------------------------------------------------------------------------------------------------------------------------------------------------------------------------------------------------------------------------------------------------------------------------------------|---------------------------------------------------------------------------------------------------------------------------------------------------|
| <b>Parameters</b> |                                                                                                                                                     |                                                                                                                                                                     |                                                                                                                                                                                                                                                                                                                                                                                                                                                                                                                      |                                                                                                                                                   |
| Emotion Conflict  | <p>F(1, 383) = 5.49<br/><b>p = 0.02</b></p> <p>Betas [CI]</p> <ul style="list-style-type: none"> <li>Age:<br/>0 [-0.01, 0.02], p = 0.905</li> </ul> | <p>F(1, 383) = 8.02<br/><b>p = 0.005</b></p> <p>Betas [CI]</p> <ul style="list-style-type: none"> <li>Sex:<br/>-0.31 [-0.47, -0.16], <b>p &lt; 0.001</b></li> </ul> | <p>F(2, 383) = 19.17<br/><b>p &lt; 0.001</b></p> <p>Betas [CI]</p> <ul style="list-style-type: none"> <li>DEP/ANX:<br/>-0.21 [-0.42, 0.01], p = 0.062</li> <li>SUDs:<br/>-0.58 [-0.83, -0.34], <b>p &lt; 0.001</b></li> </ul> <p>Post-hoc Contrasts</p> <ul style="list-style-type: none"> <li>HC - DEP/ANX:<br/>c = 0.31, t(383) = 2.93, <b>p = 0.004</b></li> <li>HC - SUDs:<br/>c = 0.77, t(383) = 6.60, <b>p &lt; 0.001</b></li> <li>DEP/ANX - SUDs:<br/>c = 0.46, t(383) = 4.89, <b>p &lt; 0.001</b></li> </ul> | <p>F(1, 383) = 3.03<br/>p = 0.082</p> <p>Betas [CI]</p> <ul style="list-style-type: none"> <li>WRAT:<br/>0.01 [-0.02, 0.04], p = 0.451</li> </ul> |

Appendix 1 to Smith R, Lavalley CA, Taylor S, et al. Elevated decision uncertainty and reduced avoidance drives in depression, anxiety and substance use disorders during approach–avoidance conflict: a replication study. *J Psychiatry Neurosci* 2023. doi: 10.1503/jpn.220226. Copyright © 2023 The Author(s) or their employer(s). To receive this resource in an accessible format, please contact us at cmajgroup@cmaj.ca. Online appendices are unedited and posted as supplied by the authors.

|                      |                                                                                                       |                                                                                                                |                                                                                                                                                             |                                                                                                                 |
|----------------------|-------------------------------------------------------------------------------------------------------|----------------------------------------------------------------------------------------------------------------|-------------------------------------------------------------------------------------------------------------------------------------------------------------|-----------------------------------------------------------------------------------------------------------------|
| Decision Uncertainty | F(1, 383) = 25.92<br><b>p &lt; 0.001</b><br><br>Betas [CI]<br>• Age:<br>0.01 [-0.01, 0.03], p = 0.577 | F(1, 383) = 3.04<br>p = 0.082<br><br>Betas [CI]<br>• Sex:<br>-0.18 [-0.39, 0.02], p = 0.085                    | F(2, 383) = 0.11<br>p = 0.893<br><br>Betas [CI]<br>• DEP/ANX:<br>-0.04 [-0.32, 0.24], p = 0.763<br>• SUDs:<br>0.16 [-0.16, 0.48], p = 0.336                 | F(1, 383) = 13.79<br><b>p &lt; 0.001</b><br><br>Betas [CI]<br>• WRAT:<br>-0.05 [-0.09, -0.01], p = <b>0.007</b> |
| <b>Self-Reports</b>  | <b>Age</b>                                                                                            | <b>Sex</b>                                                                                                     | <b>Group</b>                                                                                                                                                | <b>WRAT</b>                                                                                                     |
| Q1. Enjoyable        | F(1, 382) = 1.88<br>p = 0.172<br><br>Betas [CI]<br>• Age:<br>0.04 [0.01, 0.07], p = <b>0.007</b>      | F(1, 382) = 4.1<br><b>p = 0.044</b><br><br>Betas [CI]<br>• Sex:<br>-0.22 [-0.55, 0.11], p = 0.199              | F(2, 382) = 2.98<br>p = 0.052<br><br>Betas [CI]<br>• DEP/ANX:<br>-0.47 [-0.91, -0.02], p = <b>0.042</b><br>• SUDs:<br>-0.61 [-1.12, -0.1], p = <b>0.019</b> | F(1, 382) = 2.68<br>p = 0.103<br><br>Betas [CI]<br>• WRAT:<br>-0.05 [-0.12, 0.01], p = 0.099                    |
| Q2. Anxious          | F(1, 382) = 0.01<br>p = 0.941<br><br>Betas [CI]<br>• Age:<br>-0.04 [-0.08, 0], p = <b>0.04</b>        | F(1, 382) = 13.17<br><b>p &lt; 0.001</b><br><br>Betas [CI]<br>• Sex:<br>-0.81 [-1.24, -0.38], p < <b>0.001</b> | F(2, 382) = 1.82<br>p = 0.163<br><br>Betas [CI]<br>• DEP/ANX:<br>0.31 [-0.27, 0.9], p = 0.292<br>• SUDs:<br>-0.14 [-0.81, 0.52], p = 0.671                  | F(1, 382) = 0.84<br>p = 0.359<br><br>Betas [CI]<br>• WRAT:<br>0.08 [0, 0.16], p = 0.058                         |

Appendix 1 to Smith R, Lavalley CA, Taylor S, et al. Elevated decision uncertainty and reduced avoidance drives in depression, anxiety and substance use disorders during approach–avoidance conflict: a replication study. *J Psychiatry Neurosci* 2023. doi: 10.1503/jpn.220226. Copyright © 2023 The Author(s) or their employer(s). To receive this resource in an accessible format, please contact us at cmajgroup@cmaj.ca. Online appendices are unedited and posted as supplied by the authors.

|                                  |                                                                                                              |                                                                                                           |                                                                                                                                                                                                                                                                                                                                                                                                                   |                                                                                                       |
|----------------------------------|--------------------------------------------------------------------------------------------------------------|-----------------------------------------------------------------------------------------------------------|-------------------------------------------------------------------------------------------------------------------------------------------------------------------------------------------------------------------------------------------------------------------------------------------------------------------------------------------------------------------------------------------------------------------|-------------------------------------------------------------------------------------------------------|
| <p>Q3.<br/>Difficulty</p>        | <p>F(1, 382) = 4.55<br/><b>p = 0.034</b></p> <p>Betas [CI]<br/>• Age:<br/>0 [-0.04, 0.03], p = 0.793</p>     | <p>F(1, 382) = 2<br/>p = 0.158</p> <p>Betas [CI]<br/>• Sex:<br/>-0.15 [-0.53, 0.23], p = 0.446</p>        | <p>F(2, 382) = 0.74<br/>p = 0.478</p> <p>Betas [CI]<br/>• DEP/ANX:<br/>0.17 [-0.34, 0.69], p = 0.514<br/>• SUDs:<br/>0.46 [-0.13, 1.04], p = 0.126</p>                                                                                                                                                                                                                                                            | <p>F(1, 382) = 0.03<br/>p = 0.872</p> <p>Betas [CI]<br/>• WRAT:<br/>0.01 [-0.06, 0.09], p = 0.732</p> |
| <p>Q4.<br/>Approached Points</p> | <p>F(1, 382) = 8.79<br/><b>p = 0.003</b></p> <p>Betas [CI]<br/>• Age:<br/>-0.02 [-0.07, 0.03], p = 0.404</p> | <p>F(1, 382) = 2.29<br/>p = 0.131</p> <p>Betas [CI]<br/>• Sex:<br/>0.53 [0.03, 1.03], <b>p = 0.04</b></p> | <p>F(2, 382) = 8.35<br/><b>p &lt; 0.001</b></p> <p>Betas [CI]<br/>• DEP/ANX:<br/>0.74 [0.06, 1.41], <b>p = 0.034</b><br/>• SUDs:<br/>1.23 [0.46, 2], <b>p = 0.002</b></p> <p>Post-hoc Contrasts<br/>• HC - DEP/ANX:<br/>c = -0.83, t(382) = -2.51, <b>p = 0.013</b><br/>• HC - SUDs:<br/>c = -1.69, t(382) = -4.58, <b>p &lt; 0.001</b><br/>• DEP/ANX - SUDs:<br/>c = -0.86, t(382) = -2.86, <b>p = 0.004</b></p> | <p>F(1, 382) = 0.8<br/>p = 0.37</p> <p>Betas [CI]<br/>• WRAT:<br/>0.06 [-0.03, 0.16], p = 0.207</p>   |

Appendix 1 to Smith R, Lavalley CA, Taylor S, et al. Elevated decision uncertainty and reduced avoidance drives in depression, anxiety and substance use disorders during approach–avoidance conflict: a replication study. *J Psychiatry Neurosci* 2023. doi: 10.1503/jpn.220226. Copyright © 2023 The Author(s) or their employer(s). To receive this resource in an accessible format, please contact us at cmajgroup@cmaj.ca. Online appendices are unedited and posted as supplied by the authors.

|                                                |                                                                                                                                                        |                                                                                                                                                                   |                                                                                                                                                                                                                                                                                                                                                                                                                                                                                                                   |                                                                                                                                                    |
|------------------------------------------------|--------------------------------------------------------------------------------------------------------------------------------------------------------|-------------------------------------------------------------------------------------------------------------------------------------------------------------------|-------------------------------------------------------------------------------------------------------------------------------------------------------------------------------------------------------------------------------------------------------------------------------------------------------------------------------------------------------------------------------------------------------------------------------------------------------------------------------------------------------------------|----------------------------------------------------------------------------------------------------------------------------------------------------|
| <p>Q5.<br/>Avoided<br/>Negative<br/>Images</p> | <p>F(1, 382) = 6.96<br/><b>p = 0.009</b></p> <p>Betas [CI]</p> <ul style="list-style-type: none"> <li>• Age:<br/>0 [-0.04, 0.04], p = 0.963</li> </ul> | <p>F(1, 382) = 5.67<br/><b>p = 0.018</b></p> <p>Betas [CI]</p> <ul style="list-style-type: none"> <li>• Sex:<br/>-0.76 [-1.21, -0.3], <b>p = 0.001</b></li> </ul> | <p>F(2, 382) = 10.48<br/><b>p &lt; 0.001</b></p> <p>Betas [CI]</p> <ul style="list-style-type: none"> <li>• DEP/ANX:<br/>-0.22 [-0.84, 0.39], p = 0.478</li> <li>• SUDs:<br/>-0.98 [-1.69, -0.28], <b>p = 0.007</b></li> </ul> <p>Post-hoc Contrasts</p> <ul style="list-style-type: none"> <li>• HC - DEP/ANX:<br/>c = 0.46, t(382) = 1.50, p = 0.134</li> <li>• HC - SUDs:<br/>c = 1.46, t(382) = 4.34, <b>p &lt; 0.001</b></li> <li>• DEP/ANX - SUDs:<br/>c = 1.01, t(382) = 3.69, <b>p = 0.003</b></li> </ul> | <p>F(1, 382) = 0.07<br/>p = 0.784</p> <p>Betas [CI]</p> <ul style="list-style-type: none"> <li>• WRAT:<br/>0.01 [-0.08, 0.1], p = 0.858</li> </ul> |
|------------------------------------------------|--------------------------------------------------------------------------------------------------------------------------------------------------------|-------------------------------------------------------------------------------------------------------------------------------------------------------------------|-------------------------------------------------------------------------------------------------------------------------------------------------------------------------------------------------------------------------------------------------------------------------------------------------------------------------------------------------------------------------------------------------------------------------------------------------------------------------------------------------------------------|----------------------------------------------------------------------------------------------------------------------------------------------------|

Appendix 1 to Smith R, Lavalley CA, Taylor S, et al. Elevated decision uncertainty and reduced avoidance drives in depression, anxiety and substance use disorders during approach–avoidance conflict: a replication study. *J Psychiatry Neurosci* 2023. doi: 10.1503/jpn.220226. Copyright © 2023 The Author(s) or their employer(s). To receive this resource in an accessible format, please contact us at cmajgroup@cmaj.ca. Online appendices are unedited and posted as supplied by the authors.

|                       |                                                                                                          |                                                                                                                         |                                                                                                                                                                                                                                                                                                                                                                                                       |                                                                                                       |
|-----------------------|----------------------------------------------------------------------------------------------------------|-------------------------------------------------------------------------------------------------------------------------|-------------------------------------------------------------------------------------------------------------------------------------------------------------------------------------------------------------------------------------------------------------------------------------------------------------------------------------------------------------------------------------------------------|-------------------------------------------------------------------------------------------------------|
| Q6. Kept Eyes Open    | <p>F(1, 382) = 5.19<br/><b>p = 0.023</b></p> <p>Betas [CI]<br/>• Age:<br/>0 [-0.04, 0.03], p = 0.811</p> | <p>F(1, 382) = 6.26<br/><b>p = 0.013</b></p> <p>Betas [CI]<br/>• Sex:<br/>0.3 [-0.11, 0.71], p = 0.156</p>              | <p>F(2, 382) = 5.45<br/><b>p = 0.005</b></p> <p>Betas [CI]<br/>• DEP/ANX:<br/>0.49 [-0.06, 1.05], p = 0.083<br/>• SUDs:<br/>0.84 [0.21, 1.48], <b>p = 0.009</b></p> <p>Post-hoc Contrasts<br/>• HC - DEP/ANX:<br/>c = -0.43, t(382) = -1.57, p = 0.116<br/>• HC - SUDs:<br/>c = -1.01, t(382) = -3.34, <b>p = 0.001</b><br/>• DEP/ANX - SUDs:<br/>c = -0.58, t(382) = -2.36, <b>p = 0.019</b></p>     | <p>F(1, 382) = 0.19<br/>p = 0.661</p> <p>Betas [CI]<br/>• WRAT:<br/>0.01 [-0.07, 0.09], p = 0.806</p> |
| Q7. Distracted Myself | <p>F(1, 382) = 0.03<br/>p = 0.852</p> <p>Betas [CI]<br/>• Age:<br/>-0.02 [-0.06, 0.02], p = 0.376</p>    | <p>F(1, 382) = 20.1<br/><b>p &lt; 0.001</b></p> <p>Betas [CI]<br/>• Sex:<br/>-0.67 [-1.08, -0.26], <b>p = 0.001</b></p> | <p>F(2, 382) = 8.34<br/><b>p &lt; 0.001</b></p> <p>Betas [CI]<br/>• DEP/ANX:<br/>-0.03 [-0.58, 0.53], p = 0.928<br/>• SUDs:<br/>-0.84 [-1.47, -0.21], <b>p = 0.009</b></p> <p>Post-hoc Contrasts<br/>• HC - DEP/ANX:<br/>c = 0.10, t(382) = 0.37, p = 0.709<br/>• HC - SUDs:<br/>c = 1.04, t(382) = 3.48, <b>p = 0.001</b><br/>• DEP/ANX - SUDs:<br/>c = 0.94, t(382) = 3.88, <b>p &lt; 0.001</b></p> | <p>F(1, 382) = 0.06<br/>p = 0.803</p> <p>Betas [CI]<br/>• WRAT:<br/>0.06 [-0.01, 0.14], p = 0.112</p> |

Appendix 1 to Smith R, Lavalley CA, Taylor S, et al. Elevated decision uncertainty and reduced avoidance drives in depression, anxiety and substance use disorders during approach–avoidance conflict: a replication study. *J Psychiatry Neurosci* 2023. doi: 10.1503/jpn.220226. Copyright © 2023 The Author(s) or their employer(s). To receive this resource in an accessible format, please contact us at cmajgroup@cmaj.ca. Online appendices are unedited and posted as supplied by the authors.

|                                                |                                                                                                                                                    |                                                                                                                                                                        |                                                                                                                                                                                                                                                                                                                                                                                                                                                                                                |                                                                                                                                                     |
|------------------------------------------------|----------------------------------------------------------------------------------------------------------------------------------------------------|------------------------------------------------------------------------------------------------------------------------------------------------------------------------|------------------------------------------------------------------------------------------------------------------------------------------------------------------------------------------------------------------------------------------------------------------------------------------------------------------------------------------------------------------------------------------------------------------------------------------------------------------------------------------------|-----------------------------------------------------------------------------------------------------------------------------------------------------|
| <p>Q8. Other Emotion Regulation Strategies</p> | <p>F(1, 382) = 2.67<br/>p = 0.103</p> <p>Betas [CI]</p> <ul style="list-style-type: none"> <li>• Age:<br/>0.02 [-0.02, 0.06], p = 0.403</li> </ul> | <p>F(1, 382) = 15.66<br/><b>p &lt; 0.001</b></p> <p>Betas [CI]</p> <ul style="list-style-type: none"> <li>• Sex:<br/>-0.57 [-0.98, -0.16], <b>p = 0.007</b></li> </ul> | <p>F(2, 382) = 4.37<br/><b>p = 0.013</b></p> <p>Betas [CI]</p> <ul style="list-style-type: none"> <li>• DEP/ANX:<br/>-0.2 [-0.76, 0.35], p = 0.476</li> <li>• SUDs:<br/>-0.63 [-1.26, 0], p = 0.052</li> </ul> <p>Post-hoc Contrasts</p> <ul style="list-style-type: none"> <li>• HC - DEP/ANX:<br/>c = 0.21, t(382) = 0.77, p = 0.444</li> <li>• HC - SUDs:<br/>c = 0.88, t(382) = 2.91, <b>p = 0.004</b></li> <li>• DEP/ANX - SUDs:<br/>c = 0.67, t(382) = 2.73, <b>p = 0.007</b></li> </ul> | <p>F(1, 382) = 2.52<br/>p = 0.113</p> <p>Betas [CI]</p> <ul style="list-style-type: none"> <li>• WRAT:<br/>0.03 [-0.04, 0.11], p = 0.395</li> </ul> |
| <p><b>Mean Runway Position</b></p>             | <p><b>Age</b></p>                                                                                                                                  | <p><b>Sex</b></p>                                                                                                                                                      | <p><b>Group</b></p>                                                                                                                                                                                                                                                                                                                                                                                                                                                                            | <p><b>WRAT</b></p>                                                                                                                                  |



Appendix 1 to Smith R, Lavalley CA, Taylor S, et al. Elevated decision uncertainty and reduced avoidance drives in depression, anxiety and substance use disorders during approach–avoidance conflict: a replication study. *J Psychiatry Neurosci* 2023. doi: 10.1503/jpn.220226. Copyright © 2023 The Author(s) or their employer(s). To receive this resource in an accessible format, please contact us at [cmajgroup@cmaj.ca](mailto:cmajgroup@cmaj.ca). Online appendices are unedited and posted as supplied by the authors.

|         |                                                                                                                                                                |                                                                                                                                                                   |                                                                                                                                                                                                                                                                                                                                                                                                                                                                                                                      |                                                                                                                                                     |
|---------|----------------------------------------------------------------------------------------------------------------------------------------------------------------|-------------------------------------------------------------------------------------------------------------------------------------------------------------------|----------------------------------------------------------------------------------------------------------------------------------------------------------------------------------------------------------------------------------------------------------------------------------------------------------------------------------------------------------------------------------------------------------------------------------------------------------------------------------------------------------------------|-----------------------------------------------------------------------------------------------------------------------------------------------------|
| Overall | <p>F(1, 383) = 21.58<br/><b>p &lt; 0.001</b></p> <p>Betas [CI]</p> <ul style="list-style-type: none"> <li>• Age:<br/>-0.02 [-0.05, 0.02], p = 0.377</li> </ul> | <p>F(1, 383) = 6.66<br/><b>p = 0.01</b></p> <p>Betas [CI]</p> <ul style="list-style-type: none"> <li>• Sex:<br/>0.63 [0.27, 0.99], <b>p &lt; 0.001</b></li> </ul> | <p>F(2, 383) = 6.58<br/><b>p = 0.002</b></p> <p>Betas [CI]</p> <ul style="list-style-type: none"> <li>• DEP/ANX:<br/>0.37 [-0.12, 0.85], p = 0.14</li> <li>• SUDs:<br/>0.7 [0.15, 1.25], <b>p = 0.014</b></li> </ul> <p>Post-hoc Contrasts</p> <ul style="list-style-type: none"> <li>• HC - DEP/ANX:<br/>c = -0.57, t(383) = -2.40, <b>p = 0.017</b></li> <li>• HC - SUDs:<br/>c = -1.06, t(383) = -4.03, <b>p &lt; 0.001</b></li> <li>• DEP/ANX - SUDs:<br/>c = -0.49, t(383) = -2.30, <b>p = 0.022</b></li> </ul> | <p>F(1, 383) = 1.85<br/>p = 0.175</p> <p>Betas [CI]</p> <ul style="list-style-type: none"> <li>• WRAT:<br/>0.04 [-0.03, 0.11], p = 0.274</li> </ul> |
|---------|----------------------------------------------------------------------------------------------------------------------------------------------------------------|-------------------------------------------------------------------------------------------------------------------------------------------------------------------|----------------------------------------------------------------------------------------------------------------------------------------------------------------------------------------------------------------------------------------------------------------------------------------------------------------------------------------------------------------------------------------------------------------------------------------------------------------------------------------------------------------------|-----------------------------------------------------------------------------------------------------------------------------------------------------|

Appendix 1 to Smith R, Lavalley CA, Taylor S, et al. Elevated decision uncertainty and reduced avoidance drives in depression, anxiety and substance use disorders during approach–avoidance conflict: a replication study. *J Psychiatry Neurosci* 2023. doi: 10.1503/jpn.220226. Copyright © 2023 The Author(s) or their employer(s). To receive this resource in an accessible format, please contact us at cmajgroup@cmaj.ca. Online appendices are unedited and posted as supplied by the authors.

|     |                                                                                                                  |                                                                                                     |                                                                                                                                                                                                                                                                                                                                                                                                             |                                                                                                                        |
|-----|------------------------------------------------------------------------------------------------------------------|-----------------------------------------------------------------------------------------------------|-------------------------------------------------------------------------------------------------------------------------------------------------------------------------------------------------------------------------------------------------------------------------------------------------------------------------------------------------------------------------------------------------------------|------------------------------------------------------------------------------------------------------------------------|
| AV  | <p>F(1, 383) = 11.48<br/><b>p &lt; 0.001</b></p> <p>Betas [CI]<br/>• Age:<br/>-0.02 [-0.05, 0.02], p = 0.285</p> | <p>F(1, 383) = 0.14<br/>p = 0.71</p> <p>Betas [CI]<br/>• Sex:<br/>-0.13 [-0.5, 0.24], p = 0.485</p> | <p>F(2, 383) = 12.97<br/><b>p &lt; 0.001</b></p> <p>Betas [CI]<br/>• DEP/ANX:<br/>-0.15 [-0.65, 0.35], p = 0.551<br/>• SUDs:<br/>-1.27 [-1.84, -0.7], <b>p &lt; 0.001</b></p> <p>Post-hoc Contrasts<br/>• HC - DEP/ANX:<br/>c = 0.23, t(383) = 0.95, p = 0.345<br/>• HC - SUDs:<br/>c = 1.31, t(383) = 4.82, <b>p &lt; 0.001</b><br/>• DEP/ANX - SUDs:<br/>c = 1.07, t(383) = 4.89, <b>p &lt; 0.001</b></p> | <p>F(1, 383) = 27.22<br/><b>p &lt; 0.001</b></p> <p>Betas [CI]<br/>• WRAT:<br/>0.12 [0.05, 0.19], <b>p = 0.001</b></p> |
| APP | <p>F(1, 383) = 24.55<br/><b>p &lt; 0.001</b></p> <p>Betas [CI]<br/>• Age:<br/>0 [-0.03, 0.03], p = 0.888</p>     | <p>F(1, 383) = 1.49<br/>p = 0.223</p> <p>Betas [CI]<br/>• Sex:<br/>0.18 [-0.15, 0.5], p = 0.284</p> | <p>F(2, 383) = 0.55<br/>p = 0.575</p> <p>Betas [CI]<br/>• DEP/ANX:<br/>-0.24 [-0.68, 0.19], p = 0.273<br/>• SUDs:<br/>-0.06 [-0.55, 0.44], p = 0.817</p>                                                                                                                                                                                                                                                    | <p>F(1, 383) = 10.64<br/><b>p = 0.001</b></p> <p>Betas [CI]<br/>• WRAT:<br/>0.05 [-0.01, 0.11], p = 0.102</p>          |

Appendix 1 to Smith R, Lavalley CA, Taylor S, et al. Elevated decision uncertainty and reduced avoidance drives in depression, anxiety and substance use disorders during approach–avoidance conflict: a replication study. *J Psychiatry Neurosci* 2023. doi: 10.1503/jpn.220226. Copyright © 2023 The Author(s) or their employer(s). To receive this resource in an accessible format, please contact us at cmajgroup@cmaj.ca. Online appendices are unedited and posted as supplied by the authors.

|       |                                                                                                                                                     |                                                                                                                                                                    |                                                                                                                                                                                                                                                                                                                                                                                                                                                                                                                               |                                                                                                                                                     |
|-------|-----------------------------------------------------------------------------------------------------------------------------------------------------|--------------------------------------------------------------------------------------------------------------------------------------------------------------------|-------------------------------------------------------------------------------------------------------------------------------------------------------------------------------------------------------------------------------------------------------------------------------------------------------------------------------------------------------------------------------------------------------------------------------------------------------------------------------------------------------------------------------|-----------------------------------------------------------------------------------------------------------------------------------------------------|
| CONF2 | <p>F(1, 383) = 8<br/><b>p = 0.005</b></p> <p>Betas [CI]</p> <ul style="list-style-type: none"> <li>• Age:<br/>0 [-0.06, 0.05], p = 0.959</li> </ul> | <p>F(1, 383) = 8.02<br/><b>p = 0.005</b></p> <p>Betas [CI]</p> <ul style="list-style-type: none"> <li>• Sex:<br/>1.13 [0.56, 1.71], <b>p &lt; 0.001</b></li> </ul> | <p>F(2, 383) = 11.94<br/><b>p &lt; 0.001</b></p> <p>Betas [CI]</p> <ul style="list-style-type: none"> <li>• DEP/ANX:<br/>0.69 [-0.09, 1.47], p = 0.084</li> <li>• SUDs:<br/>1.59 [0.71, 2.48], <b>p &lt; 0.001</b></li> </ul> <p>Post-hoc Contrasts</p> <ul style="list-style-type: none"> <li>• HC - DEP/ANX:<br/>c = -1.06, t(383) = -2.77, <b>p = 0.006</b></li> <li>• HC - SUDs:<br/>c = -2.26, t(383) = -5.32, <b>p &lt; 0.001</b></li> <li>• DEP/ANX - SUDs:<br/>c = -1.20, t(383) = -3.48, <b>p = 0.001</b></li> </ul> | <p>F(1, 383) = 0.61<br/>p = 0.437</p> <p>Betas [CI]</p> <ul style="list-style-type: none"> <li>• WRAT:<br/>-0.01 [-0.13, 0.1], p = 0.793</li> </ul> |
|-------|-----------------------------------------------------------------------------------------------------------------------------------------------------|--------------------------------------------------------------------------------------------------------------------------------------------------------------------|-------------------------------------------------------------------------------------------------------------------------------------------------------------------------------------------------------------------------------------------------------------------------------------------------------------------------------------------------------------------------------------------------------------------------------------------------------------------------------------------------------------------------------|-----------------------------------------------------------------------------------------------------------------------------------------------------|

Appendix 1 to Smith R, Lavalley CA, Taylor S, et al. Elevated decision uncertainty and reduced avoidance drives in depression, anxiety and substance use disorders during approach–avoidance conflict: a replication study. *J Psychiatry Neurosci* 2023. doi: 10.1503/jpn.220226. Copyright © 2023 The Author(s) or their employer(s). To receive this resource in an accessible format, please contact us at cmajgroup@cmaj.ca. Online appendices are unedited and posted as supplied by the authors.

|       |                                                                                                                                                             |                                                                                                                                                                    |                                                                                                                                                                                                                                                                                                                                                                                                                                                                                                                                  |                                                                                                                                                     |
|-------|-------------------------------------------------------------------------------------------------------------------------------------------------------------|--------------------------------------------------------------------------------------------------------------------------------------------------------------------|----------------------------------------------------------------------------------------------------------------------------------------------------------------------------------------------------------------------------------------------------------------------------------------------------------------------------------------------------------------------------------------------------------------------------------------------------------------------------------------------------------------------------------|-----------------------------------------------------------------------------------------------------------------------------------------------------|
| CONF4 | <p>F(1, 383) = 10.75<br/><b>p = 0.001</b></p> <p>Betas [CI]</p> <ul style="list-style-type: none"> <li>• Age:<br/>-0.02 [-0.08, 0.03], p = 0.355</li> </ul> | <p>F(1, 383) = 6.47<br/><b>p = 0.011</b></p> <p>Betas [CI]</p> <ul style="list-style-type: none"> <li>• Sex:<br/>1.01 [0.45, 1.57], <b>p &lt; 0.001</b></li> </ul> | <p>F(2, 383) = 12.93<br/><b>p &lt; 0.001</b></p> <p>Betas [CI]</p> <ul style="list-style-type: none"> <li>• DEP/ANX:<br/>0.74 [-0.02, 1.49], p = 0.057</li> <li>• SUDs:<br/>1.67 [0.81, 2.53], <b>p &lt; 0.001</b></li> </ul> <p>Post-hoc Contrasts</p> <ul style="list-style-type: none"> <li>• HC - DEP/ANX:<br/>c = -1.07, t(383) = -2.90, <b>p = 0.004</b></li> <li>• HC - SUDs:<br/>c = -2.28, t(383) = -5.55, <b>p &lt; 0.001</b></li> <li>• DEP/ANX - SUDs:<br/>c = -1.21, t(383) = -3.63, <b>p &lt; 0.001</b></li> </ul> | <p>F(1, 383) = 0.01<br/>p = 0.913</p> <p>Betas [CI]</p> <ul style="list-style-type: none"> <li>• WRAT:<br/>0.02 [-0.09, 0.12], p = 0.761</li> </ul> |
|-------|-------------------------------------------------------------------------------------------------------------------------------------------------------------|--------------------------------------------------------------------------------------------------------------------------------------------------------------------|----------------------------------------------------------------------------------------------------------------------------------------------------------------------------------------------------------------------------------------------------------------------------------------------------------------------------------------------------------------------------------------------------------------------------------------------------------------------------------------------------------------------------------|-----------------------------------------------------------------------------------------------------------------------------------------------------|

Appendix 1 to Smith R, Lavalley CA, Taylor S, et al. Elevated decision uncertainty and reduced avoidance drives in depression, anxiety and substance use disorders during approach–avoidance conflict: a replication study. *J Psychiatry Neurosci* 2023. doi: 10.1503/jpn.220226. Copyright © 2023 The Author(s) or their employer(s). To receive this resource in an accessible format, please contact us at cmajgroup@cmaj.ca. Online appendices are unedited and posted as supplied by the authors.

|                                         |                                                                                                                                                              |                                                                                                                                                               |                                                                                                                                                                                                                                                                                                                                                                                                                                                                                                                          |                                                                                                                                                |
|-----------------------------------------|--------------------------------------------------------------------------------------------------------------------------------------------------------------|---------------------------------------------------------------------------------------------------------------------------------------------------------------|--------------------------------------------------------------------------------------------------------------------------------------------------------------------------------------------------------------------------------------------------------------------------------------------------------------------------------------------------------------------------------------------------------------------------------------------------------------------------------------------------------------------------|------------------------------------------------------------------------------------------------------------------------------------------------|
| CONF6                                   | <p>F(1, 383) = 12.27<br/><b>p &lt; 0.001</b></p> <p>Betas [CI]</p> <ul style="list-style-type: none"> <li>Age:<br/>-0.03 [-0.08, 0.03], p = 0.299</li> </ul> | <p>F(1, 383) = 5.21<br/><b>p = 0.023</b></p> <p>Betas [CI]</p> <ul style="list-style-type: none"> <li>Sex:<br/>0.96 [0.38, 1.53], <b>p = 0.001</b></li> </ul> | <p>F(2, 383) = 10.18<br/><b>p &lt; 0.001</b></p> <p>Betas [CI]</p> <ul style="list-style-type: none"> <li>DEP/ANX:<br/>0.8 [0.02, 1.57], <b>p = 0.045</b></li> <li>SUDs:<br/>1.55 [0.66, 2.43], <b>p &lt; 0.001</b></li> </ul> <p>Post-hoc Contrasts</p> <ul style="list-style-type: none"> <li>HC - DEP/ANX:<br/>c = -1.12, t(383) = -2.96, <b>p = 0.003</b></li> <li>HC - SUDs:<br/>c = -2.12, t(383) = -5.04, <b>p &lt; 0.001</b></li> <li>DEP/ANX - SUDs:<br/>c = -1.00, t(383) = -2.93, <b>p = 0.004</b></li> </ul> | <p>F(1, 383) = 0<br/>p = 0.964</p> <p>Betas [CI]</p> <ul style="list-style-type: none"> <li>WRAT:<br/>0.02 [-0.09, 0.13], p = 0.698</li> </ul> |
| Standard Deviation (SD) Runway Position | Age                                                                                                                                                          | Sex                                                                                                                                                           | Group                                                                                                                                                                                                                                                                                                                                                                                                                                                                                                                    | WRAT                                                                                                                                           |

Appendix 1 to Smith R, Lavalley CA, Taylor S, et al. Elevated decision uncertainty and reduced avoidance drives in depression, anxiety and substance use disorders during approach–avoidance conflict: a replication study. *J Psychiatry Neurosci* 2023. doi: 10.1503/jpn.220226. Copyright © 2023 The Author(s) or their employer(s). To receive this resource in an accessible format, please contact us at cmajgroup@cmaj.ca. Online appendices are unedited and posted as supplied by the authors.

|         |                                                                                                                 |                                                                                                                      |                                                                                                                                                                                                                                                                                                                                                                                                               |                                                                                                                           |
|---------|-----------------------------------------------------------------------------------------------------------------|----------------------------------------------------------------------------------------------------------------------|---------------------------------------------------------------------------------------------------------------------------------------------------------------------------------------------------------------------------------------------------------------------------------------------------------------------------------------------------------------------------------------------------------------|---------------------------------------------------------------------------------------------------------------------------|
| Overall | <p>F(1, 383) = 15.72<br/><b>p &lt; 0.001</b></p> <p>Betas [CI]<br/>• Age:<br/>0 [-0.02, 0.03], p = 0.739</p>    | <p>F(1, 383) = 7.02<br/><b>p = 0.008</b></p> <p>Betas [CI]<br/>• Sex:<br/>-0.35 [-0.61, -0.09], <b>p = 0.009</b></p> | <p>F(2, 383) = 1.75<br/>p = 0.175</p> <p>Betas [CI]<br/>• DEP/ANX:<br/>-0.26 [-0.62, 0.1], p = 0.153<br/>• SUDs:<br/>-0.15 [-0.56, 0.25], p = 0.463</p>                                                                                                                                                                                                                                                       | <p>F(1, 383) = 3.97<br/><b>p = 0.047</b></p> <p>Betas [CI]<br/>• WRAT:<br/>-0.03 [-0.08, 0.02], p = 0.195</p>             |
| AV      | <p>F(1, 383) = 12.66<br/><b>p &lt; 0.001</b></p> <p>Betas [CI]<br/>• Age:<br/>0.01 [-0.01, 0.03], p = 0.373</p> | <p>F(1, 383) = 1.76<br/>p = 0.186</p> <p>Betas [CI]<br/>• Sex:<br/>0.16 [-0.1, 0.41], p = 0.226</p>                  | <p>F(2, 383) = 12.48<br/><b>p &lt; 0.001</b></p> <p>Betas [CI]<br/>• DEP/ANX:<br/>0.14 [-0.2, 0.48], p = 0.416<br/>• SUDs:<br/>0.77 [0.38, 1.16], <b>p &lt; 0.001</b></p> <p>Post-hoc Contrasts<br/>• HC - DEP/ANX:<br/>c = -0.18, t(383) = -1.08, p = 0.279<br/>• HC - SUDs:<br/>c = -0.83, t(383) = -4.45, <b>p &lt; 0.001</b><br/>• DEP/ANX - SUDs:<br/>c = -0.65, t(383) = -4.29, <b>p &lt; 0.001</b></p> | <p>F(1, 383) = 19.32<br/><b>p &lt; 0.001</b></p> <p>Betas [CI]<br/>• WRAT:<br/>-0.05 [-0.1, -0.01], <b>p = 0.029</b></p>  |
| APP     | <p>F(1, 383) = 29.06<br/><b>p &lt; 0.001</b></p> <p>Betas [CI]<br/>• Age:<br/>0.01 [-0.01, 0.03], p = 0.323</p> | <p>F(1, 383) = 2.66<br/>p = 0.104</p> <p>Betas [CI]<br/>• Sex:<br/>-0.05 [-0.3, 0.19], p = 0.664</p>                 | <p>F(2, 383) = 0.71<br/>p = 0.492</p> <p>Betas [CI]<br/>• DEP/ANX:<br/>0.01 [-0.32, 0.34], p = 0.938<br/>• SUDs:<br/>0.21 [-0.16, 0.58], p = 0.272</p>                                                                                                                                                                                                                                                        | <p>F(1, 383) = 14.98<br/><b>p &lt; 0.001</b></p> <p>Betas [CI]<br/>• WRAT:<br/>-0.06 [-0.11, -0.02], <b>p = 0.009</b></p> |

Appendix 1 to Smith R, Lavalley CA, Taylor S, et al. Elevated decision uncertainty and reduced avoidance drives in depression, anxiety and substance use disorders during approach–avoidance conflict: a replication study. *J Psychiatry Neurosci* 2023. doi: 10.1503/jpn.220226. Copyright © 2023 The Author(s) or their employer(s). To receive this resource in an accessible format, please contact us at [cmajgroup@cmaj.ca](mailto:cmajgroup@cmaj.ca). Online appendices are unedited and posted as supplied by the authors.

|       |                                                                                                              |                                                                                                             |                                                                                                                                                         |                                                                                                                       |
|-------|--------------------------------------------------------------------------------------------------------------|-------------------------------------------------------------------------------------------------------------|---------------------------------------------------------------------------------------------------------------------------------------------------------|-----------------------------------------------------------------------------------------------------------------------|
| CONF2 | <p>F(1, 383) = 12.55<br/><b>p &lt; 0.001</b></p> <p>Betas [CI]<br/>• Age:<br/>0 [-0.02, 0.03], p = 0.836</p> | <p>F(1, 383) = 4.11<br/><b>p = 0.043</b></p> <p>Betas [CI]<br/>• Sex:<br/>-0.14 [-0.4, 0.12], p = 0.302</p> | <p>F(2, 383) = 0.39<br/>p = 0.679</p> <p>Betas [CI]<br/>• DEP/ANX:<br/>0.04 [-0.32, 0.4], p = 0.822<br/>• SUDs:<br/>0.18 [-0.22, 0.59], p = 0.382</p>   | <p>F(1, 383) = 9.21<br/><b>p = 0.003</b></p> <p>Betas [CI]<br/>• WRAT:<br/>-0.06 [-0.11, -0.01], <b>p = 0.028</b></p> |
| CONF4 | <p>F(1, 383) = 6.01<br/><b>p = 0.015</b></p> <p>Betas [CI]<br/>• Age:<br/>0 [-0.03, 0.02], p = 0.985</p>     | <p>F(1, 383) = 1.62<br/>p = 0.203</p> <p>Betas [CI]<br/>• Sex:<br/>-0.13 [-0.4, 0.13], p = 0.325</p>        | <p>F(2, 383) = 0.35<br/>p = 0.707</p> <p>Betas [CI]<br/>• DEP/ANX:<br/>-0.03 [-0.39, 0.33], p = 0.857<br/>• SUDs:<br/>0.24 [-0.17, 0.65], p = 0.252</p> | <p>F(1, 383) = 6.13<br/><b>p = 0.014</b></p> <p>Betas [CI]<br/>• WRAT:<br/>-0.06 [-0.11, -0.01], <b>p = 0.017</b></p> |
| CONF6 | <p>F(1, 383) = 6.66<br/><b>p = 0.01</b></p> <p>Betas [CI]<br/>• Age:<br/>0 [-0.02, 0.03], p = 0.97</p>       | <p>F(1, 383) = 0.07<br/>p = 0.791</p> <p>Betas [CI]<br/>• Sex:<br/>-0.17 [-0.44, 0.09], p = 0.201</p>       | <p>F(2, 383) = 1.11<br/>p = 0.329</p> <p>Betas [CI]<br/>• DEP/ANX:<br/>0.16 [-0.2, 0.52], p = 0.373<br/>• SUDs:<br/>0.35 [-0.06, 0.76], p = 0.091</p>   | <p>F(1, 383) = 8.56<br/><b>p = 0.004</b></p> <p>Betas [CI]<br/>• WRAT:<br/>-0.07 [-0.12, -0.02], <b>p = 0.01</b></p>  |

Appendix 1 to Smith R, Lavalley CA, Taylor S, et al. Elevated decision uncertainty and reduced avoidance drives in depression, anxiety and substance use disorders during approach–avoidance conflict: a replication study. *J Psychiatry Neurosci* 2023. doi: 10.1503/jpn.220226. Copyright © 2023 The Author(s) or their employer(s). To receive this resource in an accessible format, please contact us at [cmajgroup@cmaj.ca](mailto:cmajgroup@cmaj.ca). Online appendices are unedited and posted as supplied by the authors.

| Response time | Age                                                                                                                                                                   | Sex                                                                                                                                                  | Group                                                                                                                                                                                                       | WRAT                                                                                                                                                |
|---------------|-----------------------------------------------------------------------------------------------------------------------------------------------------------------------|------------------------------------------------------------------------------------------------------------------------------------------------------|-------------------------------------------------------------------------------------------------------------------------------------------------------------------------------------------------------------|-----------------------------------------------------------------------------------------------------------------------------------------------------|
| Overall       | <p>F(1, 382) = 85.02<br/> <b>p &lt; 0.001</b></p> <p>Betas [CI]</p> <ul style="list-style-type: none"> <li>• Age:<br/> 0.01 [0, 0.02], <b>p &lt; 0.001</b></li> </ul> | <p>F(1, 382) = 0.25<br/> p = 0.621</p> <p>Betas [CI]</p> <ul style="list-style-type: none"> <li>• Sex:<br/> 0.05 [-0.01, 0.11], p = 0.133</li> </ul> | <p>F(2, 382) = 0.33<br/> p = 0.72</p> <p>Betas [CI]</p> <ul style="list-style-type: none"> <li>• DEP/ANX:<br/> -0.07 [-0.16, 0.01], p = 0.074</li> <li>• SUDs:<br/> -0.01 [-0.1, 0.09], p = 0.88</li> </ul> | <p>F(1, 382) = 0.97<br/> p = 0.326</p> <p>Betas [CI]</p> <ul style="list-style-type: none"> <li>• WRAT:<br/> -0.01 [-0.02, 0], p = 0.057</li> </ul> |



Appendix 1 to Smith R, Lavalley CA, Taylor S, et al. Elevated decision uncertainty and reduced avoidance drives in depression, anxiety and substance use disorders during approach–avoidance conflict: a replication study. *J Psychiatry Neurosci* 2023. doi: 10.1503/jpn.220226. Copyright © 2023 The Author(s) or their employer(s). To receive this resource in an accessible format, please contact us at cmajgroup@cmaj.ca. Online appendices are unedited and posted as supplied by the authors.

|     |                                                                                                                         |                                                                                                              |                                                                                                                                                                                                                                                                                                                                                                                                               |                                                                                                            |
|-----|-------------------------------------------------------------------------------------------------------------------------|--------------------------------------------------------------------------------------------------------------|---------------------------------------------------------------------------------------------------------------------------------------------------------------------------------------------------------------------------------------------------------------------------------------------------------------------------------------------------------------------------------------------------------------|------------------------------------------------------------------------------------------------------------|
| AV  | <p>F(1, 381) = 65.12<br/><b>p &lt; 0.001</b></p> <p>Betas [CI]<br/>• Age:<br/>0.01 [0, 0.02], <b>p &lt; 0.001</b></p>   | <p>F(1, 381) = 1.98<br/>p = 0.161</p> <p>Betas [CI]<br/>• Sex:<br/>0.14 [0.07, 0.2], <b>p &lt; 0.001</b></p> | <p>F(2, 381) = 9.08<br/><b>p &lt; 0.001</b></p> <p>Betas [CI]<br/>• DEP/ANX:<br/>-0.04 [-0.13, 0.05], p = 0.432<br/>• SUDs:<br/>0.12 [0.02, 0.22], <b>p = 0.025</b></p> <p>Post-hoc Contrasts<br/>• HC - DEP/ANX:<br/>c = -0.04, t(381) = -0.93, p = 0.353<br/>• HC - SUDs:<br/>c = -0.189, t(381) = -3.83, <b>p &lt; 0.001</b><br/>• DEP/ANX - SUDs:<br/>c = -0.147, t(381) = -3.68, <b>p &lt; 0.001</b></p> | <p>F(1, 381) = 1.82<br/>p = 0.178</p> <p>Betas [CI]<br/>• WRAT:<br/>-0.01 [-0.02, 0], p = 0.166</p>        |
| APP | <p>F(1, 382) = 76.7<br/><b>p &lt; 0.001</b></p> <p>Betas [CI]<br/>• Age:<br/>0.01 [0.01, 0.02], <b>p &lt; 0.001</b></p> | <p>F(1, 382) = 0.51<br/>p = 0.476</p> <p>Betas [CI]<br/>• Sex:<br/>0.03 [-0.04, 0.1], p = 0.408</p>          | <p>F(2, 382) = 0.48<br/>p = 0.617</p> <p>Betas [CI]<br/>• DEP/ANX:<br/>-0.08 [-0.17, 0.02], p = 0.131<br/>• SUDs:<br/>0.02 [-0.1, 0.13], p = 0.783</p>                                                                                                                                                                                                                                                        | <p>F(1, 382) = 2.96<br/>p = 0.086</p> <p>Betas [CI]<br/>• WRAT:<br/>-0.01 [-0.03, 0], <b>p = 0.041</b></p> |

Appendix 1 to Smith R, Lavalley CA, Taylor S, et al. Elevated decision uncertainty and reduced avoidance drives in depression, anxiety and substance use disorders during approach–avoidance conflict: a replication study. *J Psychiatry Neurosci* 2023. doi: 10.1503/jpn.220226. Copyright © 2023 The Author(s) or their employer(s). To receive this resource in an accessible format, please contact us at [cmajgroup@cmaj.ca](mailto:cmajgroup@cmaj.ca). Online appendices are unedited and posted as supplied by the authors.

|       |                                                                                                                                                                          |                                                                                                                                                            |                                                                                                                                                                                                                       |                                                                                                                                                              |
|-------|--------------------------------------------------------------------------------------------------------------------------------------------------------------------------|------------------------------------------------------------------------------------------------------------------------------------------------------------|-----------------------------------------------------------------------------------------------------------------------------------------------------------------------------------------------------------------------|--------------------------------------------------------------------------------------------------------------------------------------------------------------|
| CONF2 | <p>F(1, 382) = 69.14<br/> <b>p &lt; 0.001</b></p> <p>Betas [CI]<br/> <ul style="list-style-type: none"> <li>• Age:<br/> 0.01 [0, 0.02], <b>p = 0.001</b></li> </ul> </p> | <p>F(1, 382) = 0.93<br/> p = 0.334</p> <p>Betas [CI]<br/> <ul style="list-style-type: none"> <li>• Sex:<br/> 0.03 [-0.04, 0.11], p = 0.342</li> </ul> </p> | <p>F(2, 382) = 0.42<br/> p = 0.658</p> <p>Betas [CI]<br/> <ul style="list-style-type: none"> <li>• DEP/ANX:<br/> -0.1 [-0.2, 0], <b>p = 0.048</b></li> <li>• SUDs:<br/> -0.06 [-0.17, 0.05], p = 0.26</li> </ul> </p> | <p>F(1, 382) = 0.02<br/> p = 0.895</p> <p>Betas [CI]<br/> <ul style="list-style-type: none"> <li>• WRAT:<br/> -0.01 [-0.02, 0.01], p = 0.474</li> </ul> </p> |
|-------|--------------------------------------------------------------------------------------------------------------------------------------------------------------------------|------------------------------------------------------------------------------------------------------------------------------------------------------------|-----------------------------------------------------------------------------------------------------------------------------------------------------------------------------------------------------------------------|--------------------------------------------------------------------------------------------------------------------------------------------------------------|

Appendix 1 to Smith R, Lavalley CA, Taylor S, et al. Elevated decision uncertainty and reduced avoidance drives in depression, anxiety and substance use disorders during approach–avoidance conflict: a replication study. *J Psychiatry Neurosci* 2023. doi: 10.1503/jpn.220226. Copyright © 2023 The Author(s) or their employer(s). To receive this resource in an accessible format, please contact us at [cmajgroup@cmaj.ca](mailto:cmajgroup@cmaj.ca). Online appendices are unedited and posted as supplied by the authors.

|       |                                                                                                                                                                   |                                                                                                                                                    |                                                                                                                                                                                                                |                                                                                                                                                     |
|-------|-------------------------------------------------------------------------------------------------------------------------------------------------------------------|----------------------------------------------------------------------------------------------------------------------------------------------------|----------------------------------------------------------------------------------------------------------------------------------------------------------------------------------------------------------------|-----------------------------------------------------------------------------------------------------------------------------------------------------|
| CONF4 | <p>F(1, 382) = 58.14<br/> <b>p &lt; 0.001</b></p> <p>Betas [CI]</p> <ul style="list-style-type: none"> <li>• Age:<br/> 0.01 [0, 0.02], <b>p = 0.01</b></li> </ul> | <p>F(1, 382) = 0.41<br/> p = 0.52</p> <p>Betas [CI]</p> <ul style="list-style-type: none"> <li>• Sex:<br/> 0.03 [-0.04, 0.1], p = 0.394</li> </ul> | <p>F(2, 382) = 0.17<br/> p = 0.846</p> <p>Betas [CI]</p> <ul style="list-style-type: none"> <li>• DEP/ANX:<br/> -0.08 [-0.18, 0.02], p = 0.122</li> <li>• SUDs:<br/> -0.03 [-0.14, 0.08], p = 0.598</li> </ul> | <p>F(1, 382) = 0.01<br/> p = 0.918</p> <p>Betas [CI]</p> <ul style="list-style-type: none"> <li>• WRAT:<br/> -0.01 [-0.03, 0], p = 0.102</li> </ul> |
|-------|-------------------------------------------------------------------------------------------------------------------------------------------------------------------|----------------------------------------------------------------------------------------------------------------------------------------------------|----------------------------------------------------------------------------------------------------------------------------------------------------------------------------------------------------------------|-----------------------------------------------------------------------------------------------------------------------------------------------------|

Appendix 1 to Smith R, Lavalley CA, Taylor S, et al. Elevated decision uncertainty and reduced avoidance drives in depression, anxiety and substance use disorders during approach–avoidance conflict: a replication study. *J Psychiatry Neurosci* 2023. doi: 10.1503/jpn.220226. Copyright © 2023 The Author(s) or their employer(s). To receive this resource in an accessible format, please contact us at [cmajgroup@cmaj.ca](mailto:cmajgroup@cmaj.ca). Online appendices are unedited and posted as supplied by the authors.

|       |                                                                                                                                                                          |                                                                                                                                                           |                                                                                                                                                                                                                  |                                                                                                                                                                  |
|-------|--------------------------------------------------------------------------------------------------------------------------------------------------------------------------|-----------------------------------------------------------------------------------------------------------------------------------------------------------|------------------------------------------------------------------------------------------------------------------------------------------------------------------------------------------------------------------|------------------------------------------------------------------------------------------------------------------------------------------------------------------|
| CONF6 | <p>F(1, 382) = 40.57<br/> <b>p &lt; 0.001</b></p> <p>Betas [CI]<br/> <ul style="list-style-type: none"> <li>• Age:<br/> 0.01 [0, 0.02], <b>p = 0.014</b></li> </ul> </p> | <p>F(1, 382) = 0.9<br/> p = 0.344</p> <p>Betas [CI]<br/> <ul style="list-style-type: none"> <li>• Sex:<br/> 0.01 [-0.06, 0.08], p = 0.825</li> </ul> </p> | <p>F(2, 382) = 0.6<br/> p = 0.548</p> <p>Betas [CI]<br/> <ul style="list-style-type: none"> <li>• DEP/ANX:<br/> -0.09 [-0.19, 0], p = 0.062</li> <li>• SUDs:<br/> -0.08 [-0.19, 0.03], p = 0.158</li> </ul> </p> | <p>F(1, 382) = 0.69<br/> p = 0.406</p> <p>Betas [CI]<br/> <ul style="list-style-type: none"> <li>• WRAT:<br/> -0.02 [-0.03, 0], <b>p = 0.013</b></li> </ul> </p> |
|-------|--------------------------------------------------------------------------------------------------------------------------------------------------------------------------|-----------------------------------------------------------------------------------------------------------------------------------------------------------|------------------------------------------------------------------------------------------------------------------------------------------------------------------------------------------------------------------|------------------------------------------------------------------------------------------------------------------------------------------------------------------|

Appendix 1 to Smith R, Lavalley CA, Taylor S, et al. Elevated decision uncertainty and reduced avoidance drives in depression, anxiety and substance use disorders during approach–avoidance conflict: a replication study. *J Psychiatry Neurosci* 2023. doi: 10.1503/jpn.220226. Copyright © 2023 The Author(s) or their employer(s). To receive this resource in an accessible format, please contact us at cmajgroup@cmaj.ca. Online appendices are unedited and posted as supplied by the authors.

### Interaction Effects

|                  | Age*Group                                                                                                                                                                                                        | Group*Sex                                                                                                                                                                                                                                                                                                                                                                                                                                                                                                                                                                                                                                                                                                                                                                                                 | GROUP*WRAT                                                                                                                                                                                                                                                                                                                                                                                                                                                                                               |
|------------------|------------------------------------------------------------------------------------------------------------------------------------------------------------------------------------------------------------------|-----------------------------------------------------------------------------------------------------------------------------------------------------------------------------------------------------------------------------------------------------------------------------------------------------------------------------------------------------------------------------------------------------------------------------------------------------------------------------------------------------------------------------------------------------------------------------------------------------------------------------------------------------------------------------------------------------------------------------------------------------------------------------------------------------------|----------------------------------------------------------------------------------------------------------------------------------------------------------------------------------------------------------------------------------------------------------------------------------------------------------------------------------------------------------------------------------------------------------------------------------------------------------------------------------------------------------|
| Parameters       |                                                                                                                                                                                                                  |                                                                                                                                                                                                                                                                                                                                                                                                                                                                                                                                                                                                                                                                                                                                                                                                           |                                                                                                                                                                                                                                                                                                                                                                                                                                                                                                          |
| Emotion Conflict | <p>F(2, 383) = 0.78<br/>p = 0.457</p> <p>Betas [CI]</p> <ul style="list-style-type: none"> <li>• Age*DEP/ANX:<br/>0.01 [-0.01, 0.03], p = 0.22</li> <li>• Age*SUDs:<br/>0.01 [-0.01, 0.03], p = 0.375</li> </ul> | <p>F(2, 383) = 5.11<br/><b>p = 0.006</b></p> <p>Betas [CI]</p> <ul style="list-style-type: none"> <li>• DEP/ANX*Sex:<br/>0.21 [0.01, 0.41], <b>p = 0.04</b></li> <li>• SUDs*Sex:<br/>0.38 [0.15, 0.62], <b>p = 0.002</b></li> </ul> <p>Post-hoc Contrasts</p> <p>Male:</p> <ul style="list-style-type: none"> <li>• HC - DEP/ANX:<br/>c = -0.01, t(383) = -0.04, p = 0.971</li> <li>• HC - SUDs:<br/>c = 0.20, t(383) = 1.01, p = 0.314</li> <li>• DEP/ANX - SUDs:<br/>c = 0.21, t(383) = 1.11, p = 0.267</li> </ul> <p>Female:</p> <ul style="list-style-type: none"> <li>• HC - DEP/ANX:<br/>c = 0.42, t(383) = 3.35, <b>p &lt; 0.001</b></li> <li>• HC - SUDs:<br/>c = 0.97, t(383) = 7.00, <b>p &lt; 0.001</b></li> <li>• DEP/ANX - SUDs:<br/>c = 0.55, t(383) = 5.05, <b>p &lt; 0.001</b></li> </ul> | <p>F(2, 383) = 6.6<br/><b>p = 0.002</b></p> <p>Betas [CI]</p> <ul style="list-style-type: none"> <li>• DEP/ANX*WRAT:<br/>0.03 [-0.01, 0.06], p = 0.143</li> <li>• SUDs*WRAT:<br/>-0.03 [-0.06, 0.01], p = 0.172</li> </ul> <p>Post-hoc Contrasts</p> <ul style="list-style-type: none"> <li>• HC - DEP/ANX:<br/>c = -0.03, t(383) = -1.47, p = 0.143</li> <li>• HC - SUDs:<br/>c = 0.03, t(383) = 1.37, p = 0.172</li> <li>• DEP/ANX - SUDs:<br/>c = 0.05, t(383) = 3.63, <b>p &lt; 0.001</b></li> </ul> |

Appendix 1 to Smith R, Lavalley CA, Taylor S, et al. Elevated decision uncertainty and reduced avoidance drives in depression, anxiety and substance use disorders during approach–avoidance conflict: a replication study. *J Psychiatry Neurosci* 2023. doi: 10.1503/jpn.220226. Copyright © 2023 The Author(s) or their employer(s). To receive this resource in an accessible format, please contact us at cmajgroup@cmaj.ca. Online appendices are unedited and posted as supplied by the authors.

|                      |                                                                                                                                                              |                                                                                                                                                         |                                                                                                                                                        |
|----------------------|--------------------------------------------------------------------------------------------------------------------------------------------------------------|---------------------------------------------------------------------------------------------------------------------------------------------------------|--------------------------------------------------------------------------------------------------------------------------------------------------------|
| Decision Uncertainty | F(2, 383) = 2.83<br>p = 0.06<br><br>Betas [CI]<br>• Age*DEP/ANX:<br>0.03 [0, 0.05], <b>p = 0.035</b><br>• Age*SUDs:<br>0.03 [0, 0.06], <b>p = 0.038</b>      | F(2, 383) = 1.79<br>p = 0.168<br><br>Betas [CI]<br>• DEP/ANX*Sex:<br>0.04 [-0.22, 0.3], p = 0.766<br>• SUDs*Sex:<br>0.27 [-0.03, 0.58], p = 0.083       | F(2, 383) = 1.38<br>p = 0.252<br><br>Betas [CI]<br>• DEP/ANX*WRAT:<br>0.04 [-0.01, 0.09], p = 0.115<br>• SUDs*WRAT:<br>0.02 [-0.03, 0.06], p = 0.465   |
| <b>Self-Reports</b>  | <b>Age*Group</b>                                                                                                                                             | <b>Group*Sex</b>                                                                                                                                        | <b>GROUP*WRAT</b>                                                                                                                                      |
| Q1. Enjoyable        | F(2, 382) = 2.73<br>p = 0.066<br><br>Betas [CI]<br>• Age*DEP/ANX:<br>-0.04 [-0.08, 0], <b>p = 0.035</b><br>• Age*SUDs:<br>-0.05 [-0.09, 0], <b>p = 0.046</b> | F(2, 382) = 0.12<br>p = 0.887<br><br>Betas [CI]<br>• DEP/ANX*Sex:<br>0.08 [-0.34, 0.5], p = 0.706<br>• SUDs*Sex:<br>-0.02 [-0.51, 0.47], p = 0.949      | F(2, 382) = 0.89<br>p = 0.413<br><br>Betas [CI]<br>• DEP/ANX*WRAT:<br>0.02 [-0.05, 0.1], p = 0.523<br>• SUDs*WRAT:<br>0.05 [-0.03, 0.12], p = 0.2      |
| Q2. Anxious          | F(2, 382) = 2.89<br>p = 0.057<br><br>Betas [CI]<br>• Age*DEP/ANX:<br>0.05 [0, 0.1], <b>p = 0.038</b><br>• Age*SUDs:<br>0.07 [0.01, 0.13], <b>p = 0.031</b>   | F(2, 382) = 2.35<br>p = 0.097<br><br>Betas [CI]<br>• DEP/ANX*Sex:<br>0.47 [-0.07, 1.02], p = 0.089<br>• SUDs*Sex:<br>0.66 [0.03, 1.3], <b>p = 0.042</b> | F(2, 382) = 2.3<br>p = 0.102<br><br>Betas [CI]<br>• DEP/ANX*WRAT:<br>-0.05 [-0.15, 0.05], p = 0.33<br>• SUDs*WRAT:<br>-0.1 [-0.2, 0], <b>p = 0.041</b> |

Appendix 1 to Smith R, Lavalley CA, Taylor S, et al. Elevated decision uncertainty and reduced avoidance drives in depression, anxiety and substance use disorders during approach–avoidance conflict: a replication study. *J Psychiatry Neurosci* 2023. doi: 10.1503/jpn.220226. Copyright © 2023 The Author(s) or their employer(s). To receive this resource in an accessible format, please contact us at cmajgroup@cmaj.ca. Online appendices are unedited and posted as supplied by the authors.

|                       |                                                                                                                                                                                                                        |                                                                                                                                                                                                                                                                                                                                                                                                                                                                                                                                                                                                                                                                                                                                                                                                             |                                                                                                                                                                                                                                                                                                                                                                                                                                                                                                                      |
|-----------------------|------------------------------------------------------------------------------------------------------------------------------------------------------------------------------------------------------------------------|-------------------------------------------------------------------------------------------------------------------------------------------------------------------------------------------------------------------------------------------------------------------------------------------------------------------------------------------------------------------------------------------------------------------------------------------------------------------------------------------------------------------------------------------------------------------------------------------------------------------------------------------------------------------------------------------------------------------------------------------------------------------------------------------------------------|----------------------------------------------------------------------------------------------------------------------------------------------------------------------------------------------------------------------------------------------------------------------------------------------------------------------------------------------------------------------------------------------------------------------------------------------------------------------------------------------------------------------|
| Q3. Difficulty        | <p>F(2, 382) = 2.41<br/>p = 0.091</p> <p>Betas [CI]</p> <ul style="list-style-type: none"> <li>• Age*DEP/ANX:<br/>0.02 [-0.02, 0.07], p = 0.321</li> <li>• Age*SUDs:<br/>0.06 [0.01, 0.11], <b>p = 0.03</b></li> </ul> | <p>F(2, 382) = 0.72<br/>p = 0.487</p> <p>Betas [CI]</p> <ul style="list-style-type: none"> <li>• DEP/ANX*Sex:<br/>-0.1 [-0.59, 0.38], p = 0.675</li> <li>• SUDs*Sex:<br/>0.21 [-0.35, 0.77], p = 0.466</li> </ul>                                                                                                                                                                                                                                                                                                                                                                                                                                                                                                                                                                                           | <p>F(2, 382) = 0.12<br/>p = 0.884</p> <p>Betas [CI]</p> <ul style="list-style-type: none"> <li>• DEP/ANX*WRAT:<br/>-0.01 [-0.09, 0.08], p = 0.908</li> <li>• SUDs*WRAT:<br/>-0.02 [-0.11, 0.07], p = 0.669</li> </ul>                                                                                                                                                                                                                                                                                                |
| Q4. Approached Points | <p>F(2, 382) = 0.31<br/>p = 0.735</p> <p>Betas [CI]</p> <ul style="list-style-type: none"> <li>• Age*DEP/ANX:<br/>-0.02 [-0.08, 0.04], p = 0.479</li> <li>• Age*SUDs:<br/>-0.02 [-0.09, 0.05], p = 0.499</li> </ul>    | <p>F(2, 382) = 3.46<br/><b>p = 0.032</b></p> <p>Betas [CI]</p> <ul style="list-style-type: none"> <li>• DEP/ANX*Sex:<br/>-0.2 [-0.84, 0.43], p = 0.535</li> <li>• SUDs*Sex:<br/>-0.95 [-1.69, -0.2], <b>p = 0.013</b></li> </ul> <p>Post-hoc Contrasts</p> <p>Male:</p> <ul style="list-style-type: none"> <li>• HC - DEP/ANX:<br/>c = -0.53, t(382) = -0.98, p = 0.329</li> <li>• HC - SUDs:<br/>c = -0.28, t(382) = -0.44, p = 0.659</li> <li>• DEP/ANX - SUDs:<br/>c = 0.25, t(382) = 0.42, p = 0.677</li> </ul> <p>Female:</p> <ul style="list-style-type: none"> <li>• HC - DEP/ANX:<br/>c = -0.93, t(382) = -2.39, <b>p = 0.018</b></li> <li>• HC - SUDs:<br/>c = -2.18, t(382) = -4.99, <b>p &lt; 0.001</b></li> <li>• DEP/ANX - SUDs:<br/>c = -1.24, t(382) = -3.60, <b>p &lt; 0.001</b></li> </ul> | <p>F(2, 382) = 4.42<br/><b>p = 0.013</b></p> <p>Betas [CI]</p> <ul style="list-style-type: none"> <li>• DEP/ANX*WRAT:<br/>-0.12 [-0.24, 0], <b>p = 0.042</b></li> <li>• SUDs*WRAT:<br/>0.01 [-0.11, 0.12], p = 0.889</li> </ul> <p>Post-hoc Contrasts</p> <ul style="list-style-type: none"> <li>• HC - DEP/ANX:<br/>c = -0.12, t(382) = 2.04, <b>p = 0.042</b></li> <li>• HC - SUDs:<br/>c = -0.01, t(382) = -0.14, p = 0.889</li> <li>• DEP/ANX - SUDs:<br/>c = -0.13, t(382) = -2.81, <b>p = 0.005</b></li> </ul> |

Appendix 1 to Smith R, Lavalley CA, Taylor S, et al. Elevated decision uncertainty and reduced avoidance drives in depression, anxiety and substance use disorders during approach–avoidance conflict: a replication study. *J Psychiatry Neurosci* 2023. doi: 10.1503/jpn.220226. Copyright © 2023 The Author(s) or their employer(s). To receive this resource in an accessible format, please contact us at cmajgroup@cmaj.ca. Online appendices are unedited and posted as supplied by the authors.

|                                    |                                                                                                                                                                                                                 |                                                                                                                                                                                                                                                                                                                                                                                                                                                                                                                                                                                                                                                                                                                                                                                    |                                                                                                                                                                                                                     |
|------------------------------------|-----------------------------------------------------------------------------------------------------------------------------------------------------------------------------------------------------------------|------------------------------------------------------------------------------------------------------------------------------------------------------------------------------------------------------------------------------------------------------------------------------------------------------------------------------------------------------------------------------------------------------------------------------------------------------------------------------------------------------------------------------------------------------------------------------------------------------------------------------------------------------------------------------------------------------------------------------------------------------------------------------------|---------------------------------------------------------------------------------------------------------------------------------------------------------------------------------------------------------------------|
| <p>Q5. Avoided Negative Images</p> | <p>F(2, 382) = 1.3<br/>p = 0.274</p> <p>Betas [CI]</p> <ul style="list-style-type: none"> <li>• Age*DEP/ANX:<br/>0.04 [-0.01, 0.09], p = 0.123</li> <li>• Age*SUDs:<br/>0.04 [-0.02, 0.1], p = 0.218</li> </ul> | <p>F(2, 382) = 4.04<br/><b>p = 0.018</b></p> <p>Betas [CI]</p> <ul style="list-style-type: none"> <li>• DEP/ANX*Sex:<br/>0.47 [-0.11, 1.05], p = 0.111</li> <li>• SUDs*Sex:<br/>0.98 [0.3, 1.66], p = 0.005</li> </ul> <p>Post-hoc Contrasts</p> <p>Male:</p> <ul style="list-style-type: none"> <li>• HC - DEP/ANX:<br/>c = -0.25, t(382) = -0.50, p = 0.619</li> <li>• HC - SUDs:<br/>c = -0.0, t(382) = -0.0, p = 0.998</li> <li>• DEP/ANX - SUDs:<br/>c = 0.25, t(382) = 0.45, p = 0.653</li> </ul> <p>Female:</p> <ul style="list-style-type: none"> <li>• HC - DEP/ANX:<br/>c = 0.70, t(382) = 1.94, p = 0.053</li> <li>• HC - SUDs:<br/>c = 1.96, t(382) = 4.94, <b>p &lt; 0.001</b></li> <li>• DEP/ANX - SUDs:<br/>c = 1.27, t(382) = 4.05, <b>p &lt; 0.001</b></li> </ul> | <p>F(2, 382) = 0.8<br/>p = 0.448</p> <p>Betas [CI]</p> <ul style="list-style-type: none"> <li>• DEP/ANX*WRAT:<br/>0.01 [-0.09, 0.12], p = 0.839</li> <li>• SUDs*WRAT:<br/>-0.04 [-0.14, 0.06], p = 0.449</li> </ul> |
|------------------------------------|-----------------------------------------------------------------------------------------------------------------------------------------------------------------------------------------------------------------|------------------------------------------------------------------------------------------------------------------------------------------------------------------------------------------------------------------------------------------------------------------------------------------------------------------------------------------------------------------------------------------------------------------------------------------------------------------------------------------------------------------------------------------------------------------------------------------------------------------------------------------------------------------------------------------------------------------------------------------------------------------------------------|---------------------------------------------------------------------------------------------------------------------------------------------------------------------------------------------------------------------|



Appendix 1 to Smith R, Lavalley CA, Taylor S, et al. Elevated decision uncertainty and reduced avoidance drives in depression, anxiety and substance use disorders during approach–avoidance conflict: a replication study. *J Psychiatry Neurosci* 2023. doi: 10.1503/jpn.220226. Copyright © 2023 The Author(s) or their employer(s). To receive this resource in an accessible format, please contact us at cmajgroup@cmaj.ca. Online appendices are unedited and posted as supplied by the authors.

|                              |                                                                                                                                                                                                                   |                                                                                                                                                                                                                    |                                                                                                                                                                                                                              |
|------------------------------|-------------------------------------------------------------------------------------------------------------------------------------------------------------------------------------------------------------------|--------------------------------------------------------------------------------------------------------------------------------------------------------------------------------------------------------------------|------------------------------------------------------------------------------------------------------------------------------------------------------------------------------------------------------------------------------|
| <p>Q6. Kept Eyes Open</p>    | <p>F(2, 382) = 1.71<br/>p = 0.182</p> <p>Betas [CI]</p> <ul style="list-style-type: none"> <li>• Age*DEP/ANX:<br/>-0.04 [-0.08, 0.01], p = 0.137</li> <li>• Age*SUDs:<br/>0 [-0.05, 0.06], p = 0.933</li> </ul>   | <p>F(2, 382) = 1.43<br/>p = 0.242</p> <p>Betas [CI]</p> <ul style="list-style-type: none"> <li>• DEP/ANX*Sex:<br/>0.13 [-0.39, 0.66], p = 0.614</li> <li>• SUDs*Sex:<br/>-0.34 [-0.95, 0.27], p = 0.274</li> </ul> | <p>F(2, 382) = 2.35<br/>p = 0.097</p> <p>Betas [CI]</p> <ul style="list-style-type: none"> <li>• DEP/ANX*WRAT:<br/>-0.05 [-0.14, 0.05], p = 0.345</li> <li>• SUDs*WRAT:<br/>0.04 [-0.06, 0.13], p = 0.457</li> </ul>         |
| <p>Q7. Distracted Myself</p> | <p>F(2, 382) = 0.66<br/>p = 0.519</p> <p>Betas [CI]</p> <ul style="list-style-type: none"> <li>• Age*DEP/ANX:<br/>0.03 [-0.02, 0.07], p = 0.297</li> <li>• Age*SUDs:<br/>0.03 [-0.03, 0.08], p = 0.332</li> </ul> | <p>F(2, 382) = 0.92<br/>p = 0.399</p> <p>Betas [CI]</p> <ul style="list-style-type: none"> <li>• DEP/ANX*Sex:<br/>0.15 [-0.36, 0.67], p = 0.559</li> <li>• SUDs*Sex:<br/>0.42 [-0.19, 1.02], p = 0.178</li> </ul>  | <p>F(2, 382) = 2.64<br/>p = 0.072</p> <p>Betas [CI]</p> <ul style="list-style-type: none"> <li>• DEP/ANX*WRAT:<br/>-0.06 [-0.15, 0.04], p = 0.243</li> <li>• SUDs*WRAT:<br/>-0.11 [-0.2, -0.01], p = <b>0.026</b></li> </ul> |

Appendix 1 to Smith R, Lavalley CA, Taylor S, et al. Elevated decision uncertainty and reduced avoidance drives in depression, anxiety and substance use disorders during approach–avoidance conflict: a replication study. *J Psychiatry Neurosci* 2023. doi: 10.1503/jpn.220226. Copyright © 2023 The Author(s) or their employer(s). To receive this resource in an accessible format, please contact us at cmajgroup@cmaj.ca. Online appendices are unedited and posted as supplied by the authors.

|                                                |                                                                                                                                                                                                                 |                                                                                                                                                                                                                  |                                                                                                                                                                                                                      |
|------------------------------------------------|-----------------------------------------------------------------------------------------------------------------------------------------------------------------------------------------------------------------|------------------------------------------------------------------------------------------------------------------------------------------------------------------------------------------------------------------|----------------------------------------------------------------------------------------------------------------------------------------------------------------------------------------------------------------------|
| <p>Q8. Other Emotion Regulation Strategies</p> | <p>F(2, 382) = 0.05<br/>p = 0.949</p> <p>Betas [CI]</p> <ul style="list-style-type: none"> <li>• Age*DEP/ANX:<br/>0 [-0.05, 0.05], p = 0.926</li> <li>• Age*SUDs:<br/>-0.01 [-0.06, 0.05], p = 0.837</li> </ul> | <p>F(2, 382) = 1.82<br/>p = 0.163</p> <p>Betas [CI]</p> <ul style="list-style-type: none"> <li>• DEP/ANX*Sex:<br/>0.01 [-0.51, 0.53], p = 0.962</li> <li>• SUDs*Sex:<br/>0.51 [-0.1, 1.12], p = 0.102</li> </ul> | <p>F(2, 382) = 1.87<br/>p = 0.155</p> <p>Betas [CI]</p> <ul style="list-style-type: none"> <li>• DEP/ANX*WRAT:<br/>0.03 [-0.07, 0.12], p = 0.545</li> <li>• SUDs*WRAT:<br/>-0.04 [-0.14, 0.05], p = 0.368</li> </ul> |
| <p><b>Mean Runway Position</b></p>             | <p><b>Age*Group</b></p>                                                                                                                                                                                         | <p><b>Group*Sex</b></p>                                                                                                                                                                                          | <p><b>GROUP*WRAT</b></p>                                                                                                                                                                                             |

Appendix 1 to Smith R, Lavalley CA, Taylor S, et al. Elevated decision uncertainty and reduced avoidance drives in depression, anxiety and substance use disorders during approach–avoidance conflict: a replication study. *J Psychiatry Neurosci* 2023. doi: 10.1503/jpn.220226. Copyright © 2023 The Author(s) or their employer(s). To receive this resource in an accessible format, please contact us at cmajgroup@cmaj.ca. Online appendices are unedited and posted as supplied by the authors.

|         |                                                                                                                                                                                                                    |                                                                                                                                                                                                                                                                                                                                                                                                                                                                                                                                                                                                                                                                                                                                                                                                        |                                                                                                                                                                                                                    |
|---------|--------------------------------------------------------------------------------------------------------------------------------------------------------------------------------------------------------------------|--------------------------------------------------------------------------------------------------------------------------------------------------------------------------------------------------------------------------------------------------------------------------------------------------------------------------------------------------------------------------------------------------------------------------------------------------------------------------------------------------------------------------------------------------------------------------------------------------------------------------------------------------------------------------------------------------------------------------------------------------------------------------------------------------------|--------------------------------------------------------------------------------------------------------------------------------------------------------------------------------------------------------------------|
| Overall | <p>F(2, 383) = 1.47<br/>p = 0.231</p> <p>Betas [CI]</p> <ul style="list-style-type: none"> <li>• Age*DEP/ANX:<br/>-0.03 [-0.08, 0.01], p = 0.111</li> <li>• Age*SUDs:<br/>-0.04 [-0.09, 0.01], p = 0.16</li> </ul> | <p>F(2, 383) = 3.88<br/><b>p = 0.021</b></p> <p>Betas [CI]</p> <ul style="list-style-type: none"> <li>• DEP/ANX*Sex:<br/>-0.42 [-0.87, 0.04], p = 0.071</li> <li>• SUDs*Sex:<br/>-0.75 [-1.28, -0.22], <b>p = 0.006</b></li> </ul> <p>Post-hoc Contrasts</p> <p>Male:</p> <ul style="list-style-type: none"> <li>• HC - DEP/ANX:<br/>c = 0.05, t(383) = 0.14, p = 0.893</li> <li>• HC - SUDs:<br/>c = 0.05, t(383) = 0.11, p = 0.912</li> <li>• DEP/ANX - SUDs:<br/>c = -0.0, t(383) = -0.0, p = 0.997</li> </ul> <p>Female:</p> <ul style="list-style-type: none"> <li>• HC - DEP/ANX:<br/>c = -0.78, t(383) = -2.80, <b>p = 0.005</b></li> <li>• HC - SUDs:<br/>c = -1.44, t(383) = -4.64, <b>p &lt; 0.001</b></li> <li>• DEP/ANX - SUDs:<br/>c = -0.66, t(383) = -2.69, <b>p = 0.008</b></li> </ul> | <p>F(2, 383) = 2.5<br/>p = 0.083</p> <p>Betas [CI]</p> <ul style="list-style-type: none"> <li>• DEP/ANX*WRAT:<br/>-0.06 [-0.14, 0.02], p = 0.16</li> <li>• SUDs*WRAT:<br/>0.01 [-0.07, 0.09], p = 0.786</li> </ul> |
|---------|--------------------------------------------------------------------------------------------------------------------------------------------------------------------------------------------------------------------|--------------------------------------------------------------------------------------------------------------------------------------------------------------------------------------------------------------------------------------------------------------------------------------------------------------------------------------------------------------------------------------------------------------------------------------------------------------------------------------------------------------------------------------------------------------------------------------------------------------------------------------------------------------------------------------------------------------------------------------------------------------------------------------------------------|--------------------------------------------------------------------------------------------------------------------------------------------------------------------------------------------------------------------|

Appendix 1 to Smith R, Lavalley CA, Taylor S, et al. Elevated decision uncertainty and reduced avoidance drives in depression, anxiety and substance use disorders during approach–avoidance conflict: a replication study. *J Psychiatry Neurosci* 2023. doi: 10.1503/jpn.220226. Copyright © 2023 The Author(s) or their employer(s). To receive this resource in an accessible format, please contact us at cmajgroup@cmaj.ca. Online appendices are unedited and posted as supplied by the authors.

|     |                                                                                                                                                                                                                                                                                                                                                                                                                                                                                                                |                                                                                                                                                                                                                  |                                                                                                                                                                                                                                                                                                                                                                                                                                                                                                             |
|-----|----------------------------------------------------------------------------------------------------------------------------------------------------------------------------------------------------------------------------------------------------------------------------------------------------------------------------------------------------------------------------------------------------------------------------------------------------------------------------------------------------------------|------------------------------------------------------------------------------------------------------------------------------------------------------------------------------------------------------------------|-------------------------------------------------------------------------------------------------------------------------------------------------------------------------------------------------------------------------------------------------------------------------------------------------------------------------------------------------------------------------------------------------------------------------------------------------------------------------------------------------------------|
| AV  | <p>F(2, 383) = 0.71<br/>p = 0.494</p> <p>Betas [CI]</p> <ul style="list-style-type: none"> <li>• Age*DEP/ANX:<br/>-0.01 [-0.05, 0.03], p = 0.671</li> <li>• Age*SUDs:<br/>-0.03 [-0.08, 0.02], p = 0.247</li> </ul>                                                                                                                                                                                                                                                                                            | <p>F(2, 383) = 0.24<br/>p = 0.786</p> <p>Betas [CI]</p> <ul style="list-style-type: none"> <li>• DEP/ANX*Sex:<br/>0.16 [-0.3, 0.63], p = 0.496</li> <li>• SUDs*Sex:<br/>0.07 [-0.48, 0.62], p = 0.8</li> </ul>   | <p>F(2, 383) = 3.77<br/><b>p = 0.024</b></p> <p>Betas [CI]</p> <ul style="list-style-type: none"> <li>• DEP/ANX*WRAT:<br/>0 [-0.09, 0.08], p = 0.981</li> <li>• SUDs*WRAT:<br/>-0.08 [-0.17, 0], <b>p = 0.047</b></li> </ul> <p>Post-hoc Contrasts</p> <ul style="list-style-type: none"> <li>• HC - DEP/ANX:<br/>c = 0.0, t(383) = 0.02, p = 0.981</li> <li>• HC - SUDs:<br/>c = 0.08, t(383) = 1.99, <b>p = 0.047</b></li> <li>• DEP/ANX - SUDs:<br/>c = 0.08, t(383) = 2.50, <b>p = 0.013</b></li> </ul> |
| APP | <p>F(2, 383) = 4.31<br/><b>p = 0.014</b></p> <p>Betas [CI]</p> <ul style="list-style-type: none"> <li>• Age*DEP/ANX:<br/>-0.06 [-0.09, -0.02], <b>p = 0.004</b></li> <li>• Age*SUDs:<br/>-0.04 [-0.08, 0.01], p = 0.119</li> </ul> <p>Post-hoc Contrasts</p> <ul style="list-style-type: none"> <li>• HC - DEP/ANX:<br/>c = -0.06, t(383) = 2.94, <b>p = 0.004</b></li> <li>• HC - SUDs:<br/>c = 0.04, t(383) = 1.56, p = 0.119</li> <li>• DEP/ANX - SUDs:<br/>c = -0.02, t(383) = -1.01, p = 0.312</li> </ul> | <p>F(2, 383) = 0.3<br/>p = 0.742</p> <p>Betas [CI]</p> <ul style="list-style-type: none"> <li>• DEP/ANX*Sex:<br/>-0.14 [-0.55, 0.27], p = 0.5</li> <li>• SUDs*Sex:<br/>-0.01 [-0.49, 0.47], p = 0.967</li> </ul> | <p>F(2, 383) = 0.12<br/>p = 0.891</p> <p>Betas [CI]</p> <ul style="list-style-type: none"> <li>• DEP/ANX*WRAT:<br/>-0.02 [-0.09, 0.06], p = 0.677</li> <li>• SUDs*WRAT:<br/>0 [-0.08, 0.07], p = 0.907</li> </ul>                                                                                                                                                                                                                                                                                           |

Appendix 1 to Smith R, Lavalley CA, Taylor S, et al. Elevated decision uncertainty and reduced avoidance drives in depression, anxiety and substance use disorders during approach–avoidance conflict: a replication study. *J Psychiatry Neurosci* 2023. doi: 10.1503/jpn.220226. Copyright © 2023 The Author(s) or their employer(s). To receive this resource in an accessible format, please contact us at cmajgroup@cmaj.ca. Online appendices are unedited and posted as supplied by the authors.

|              |                                                                                                                                                                                                                     |                                                                                                                                                                                                                                                                                                                                                                                                                                                                                                                                                                                                                                                                                                                                                                                                                       |                                                                                                                                                                                                                                                                                                                                                                                                                                                                                                         |
|--------------|---------------------------------------------------------------------------------------------------------------------------------------------------------------------------------------------------------------------|-----------------------------------------------------------------------------------------------------------------------------------------------------------------------------------------------------------------------------------------------------------------------------------------------------------------------------------------------------------------------------------------------------------------------------------------------------------------------------------------------------------------------------------------------------------------------------------------------------------------------------------------------------------------------------------------------------------------------------------------------------------------------------------------------------------------------|---------------------------------------------------------------------------------------------------------------------------------------------------------------------------------------------------------------------------------------------------------------------------------------------------------------------------------------------------------------------------------------------------------------------------------------------------------------------------------------------------------|
| <p>CONF2</p> | <p>F(2, 383) = 1.37<br/>p = 0.256</p> <p>Betas [CI]</p> <ul style="list-style-type: none"> <li>• Age*DEP/ANX:<br/>-0.05 [-0.11, 0.02], p = 0.162</li> <li>• Age*SUDs:<br/>-0.06 [-0.14, 0.02], p = 0.132</li> </ul> | <p>F(2, 383) = 4.98<br/><b>p = 0.007</b></p> <p>Betas [CI]</p> <ul style="list-style-type: none"> <li>• DEP/ANX*Sex:<br/>-0.76 [-1.49, -0.03], <b>p = 0.043</b></li> <li>• SUDs*Sex:<br/>-1.37 [-2.22, -0.51], <b>p = 0.002</b></li> </ul> <p>Post-hoc Contrasts</p> <p>Male:</p> <ul style="list-style-type: none"> <li>• HC - DEP/ANX:<br/>c = 0.07, t(383) = 0.11, p = 0.914</li> <li>• HC - SUDs:<br/>c = -0.23, t(383) = -0.31, p = 0.758</li> <li>• DEP/ANX - SUDs:<br/>c = -0.30, t(383) = -0.43, p = 0.669</li> </ul> <p>Female:</p> <ul style="list-style-type: none"> <li>• HC - DEP/ANX:<br/>c = -1.45, t(383) = -3.21, <b>p = 0.002</b></li> <li>• HC - SUDs:<br/>c = -2.96, t(383) = -5.90, <b>p &lt; 0.001</b></li> <li>• DEP/ANX - SUDs:<br/>c = -1.51, t(383) = -3.82, <b>p &lt; 0.001</b></li> </ul> | <p>F(2, 383) = 4.16<br/><b>p = 0.016</b></p> <p>Betas [CI]</p> <ul style="list-style-type: none"> <li>• DEP/ANX*WRAT:<br/>-0.08 [-0.22, 0.05], p = 0.214</li> <li>• SUDs*WRAT:<br/>0.07 [-0.06, 0.2], p = 0.316</li> </ul> <p>Post-hoc Contrasts</p> <ul style="list-style-type: none"> <li>• HC - DEP/ANX:<br/>c = 0.08, t(383) = 1.25, p = 0.214</li> <li>• HC - SUDs:<br/>c = -0.07, t(383) = -1.00, p = 0.316</li> <li>• DEP/ANX - SUDs:<br/>c = -0.15, t(383) = -2.88, <b>p = 0.004</b></li> </ul> |
|--------------|---------------------------------------------------------------------------------------------------------------------------------------------------------------------------------------------------------------------|-----------------------------------------------------------------------------------------------------------------------------------------------------------------------------------------------------------------------------------------------------------------------------------------------------------------------------------------------------------------------------------------------------------------------------------------------------------------------------------------------------------------------------------------------------------------------------------------------------------------------------------------------------------------------------------------------------------------------------------------------------------------------------------------------------------------------|---------------------------------------------------------------------------------------------------------------------------------------------------------------------------------------------------------------------------------------------------------------------------------------------------------------------------------------------------------------------------------------------------------------------------------------------------------------------------------------------------------|

Appendix 1 to Smith R, Lavalley CA, Taylor S, et al. Elevated decision uncertainty and reduced avoidance drives in depression, anxiety and substance use disorders during approach–avoidance conflict: a replication study. *J Psychiatry Neurosci* 2023. doi: 10.1503/jpn.220226. Copyright © 2023 The Author(s) or their employer(s). To receive this resource in an accessible format, please contact us at cmajgroup@cmaj.ca. Online appendices are unedited and posted as supplied by the authors.

|              |                                                                                                                                                                                                                    |                                                                                                                                                                                                                                                                                                                                                                                                                                                                                                                                                                                                                                                                                                                                                                                                                |                                                                                                                                                                                                                                                                                                                                                                                                                                                                                                         |
|--------------|--------------------------------------------------------------------------------------------------------------------------------------------------------------------------------------------------------------------|----------------------------------------------------------------------------------------------------------------------------------------------------------------------------------------------------------------------------------------------------------------------------------------------------------------------------------------------------------------------------------------------------------------------------------------------------------------------------------------------------------------------------------------------------------------------------------------------------------------------------------------------------------------------------------------------------------------------------------------------------------------------------------------------------------------|---------------------------------------------------------------------------------------------------------------------------------------------------------------------------------------------------------------------------------------------------------------------------------------------------------------------------------------------------------------------------------------------------------------------------------------------------------------------------------------------------------|
| <p>CONF4</p> | <p>F(2, 383) = 0.44<br/>p = 0.645</p> <p>Betas [CI]</p> <ul style="list-style-type: none"> <li>• Age*DEP/ANX:<br/>-0.03 [-0.1, 0.03], p = 0.351</li> <li>• Age*SUDs:<br/>-0.02 [-0.09, 0.06], p = 0.655</li> </ul> | <p>F(2, 383) = 4.42<br/><b>p = 0.013</b></p> <p>Betas [CI]</p> <ul style="list-style-type: none"> <li>• DEP/ANX*Sex:<br/>-0.69 [-1.39, 0.02], p = 0.058</li> <li>• SUDs*Sex:<br/>-1.25 [-2.07, -0.42], <b>p = 0.003</b></li> </ul> <p>Post-hoc Contrasts</p> <p>Male:</p> <ul style="list-style-type: none"> <li>• HC - DEP/ANX:<br/>c = -0.05, t(383) = -0.09, p = 0.932</li> <li>• HC - SUDs:<br/>c = -0.43, t(383) = -0.60, p = 0.55</li> <li>• DEP/ANX - SUDs:<br/>c = -0.37, t(383) = -0.56, p = 0.575</li> </ul> <p>Female:</p> <ul style="list-style-type: none"> <li>• HC - DEP/ANX:<br/>c = -1.42, t(383) = -3.26, <b>p = 0.001</b></li> <li>• HC - SUDs:<br/>c = -2.92, t(383) = -6.02, <b>p &lt; 0.001</b></li> <li>• DEP/ANX - SUDs:<br/>c = -1.49, t(383) = -3.91, <b>p &lt; 0.001</b></li> </ul> | <p>F(2, 383) = 3.85<br/><b>p = 0.022</b></p> <p>Betas [CI]</p> <ul style="list-style-type: none"> <li>• DEP/ANX*WRAT:<br/>-0.1 [-0.23, 0.03], p = 0.141</li> <li>• SUDs*WRAT:<br/>0.04 [-0.08, 0.17], p = 0.507</li> </ul> <p>Post-hoc Contrasts</p> <ul style="list-style-type: none"> <li>• HC - DEP/ANX:<br/>c = 0.10, t(383) = 1.48, p = 0.141</li> <li>• HC - SUDs:<br/>c = -0.04, t(383) = -0.66, p = 0.507</li> <li>• DEP/ANX - SUDs:<br/>c = -0.14, t(383) = -2.75, <b>p = 0.006</b></li> </ul> |
|--------------|--------------------------------------------------------------------------------------------------------------------------------------------------------------------------------------------------------------------|----------------------------------------------------------------------------------------------------------------------------------------------------------------------------------------------------------------------------------------------------------------------------------------------------------------------------------------------------------------------------------------------------------------------------------------------------------------------------------------------------------------------------------------------------------------------------------------------------------------------------------------------------------------------------------------------------------------------------------------------------------------------------------------------------------------|---------------------------------------------------------------------------------------------------------------------------------------------------------------------------------------------------------------------------------------------------------------------------------------------------------------------------------------------------------------------------------------------------------------------------------------------------------------------------------------------------------|

Appendix 1 to Smith R, Lavalley CA, Taylor S, et al. Elevated decision uncertainty and reduced avoidance drives in depression, anxiety and substance use disorders during approach–avoidance conflict: a replication study. *J Psychiatry Neurosci* 2023. doi: 10.1503/jpn.220226. Copyright © 2023 The Author(s) or their employer(s). To receive this resource in an accessible format, please contact us at cmajgroup@cmaj.ca. Online appendices are unedited and posted as supplied by the authors.

|                                            |                                                                                                                                                                                                                     |                                                                                                                                                                                                                                                                                                                                                                                                                                                                                                                                                                                                                                                                                                                                                                                                            |                                                                                                                                                                                                                                                                                                                                                                                                                                                                                                         |
|--------------------------------------------|---------------------------------------------------------------------------------------------------------------------------------------------------------------------------------------------------------------------|------------------------------------------------------------------------------------------------------------------------------------------------------------------------------------------------------------------------------------------------------------------------------------------------------------------------------------------------------------------------------------------------------------------------------------------------------------------------------------------------------------------------------------------------------------------------------------------------------------------------------------------------------------------------------------------------------------------------------------------------------------------------------------------------------------|---------------------------------------------------------------------------------------------------------------------------------------------------------------------------------------------------------------------------------------------------------------------------------------------------------------------------------------------------------------------------------------------------------------------------------------------------------------------------------------------------------|
| CONF6                                      | <p>F(2, 383) = 0.39<br/>p = 0.676</p> <p>Betas [CI]</p> <ul style="list-style-type: none"> <li>• Age*DEP/ANX:<br/>-0.03 [-0.09, 0.04], p = 0.456</li> <li>• Age*SUDs:<br/>-0.03 [-0.11, 0.05], p = 0.418</li> </ul> | <p>F(2, 383) = 3.8<br/><b>p = 0.023</b></p> <p>Betas [CI]</p> <ul style="list-style-type: none"> <li>• DEP/ANX*Sex:<br/>-0.67 [-1.39, 0.06], p = 0.072</li> <li>• SUDs*Sex:<br/>-1.18 [-2.03, -0.33], <b>p = 0.007</b></li> </ul> <p>Post-hoc Contrasts</p> <p>Male:</p> <ul style="list-style-type: none"> <li>• HC - DEP/ANX:<br/>c = -0.13, t(383) = -0.21, p = 0.838</li> <li>• HC - SUDs:<br/>c = -0.36, t(383) = -0.50, p = 0.619</li> <li>• DEP/ANX - SUDs:<br/>c = -0.24, t(383) = -0.35, p = 0.73</li> </ul> <p>Female:</p> <ul style="list-style-type: none"> <li>• HC - DEP/ANX:<br/>c = -1.47, t(383) = -3.27, <b>p = 0.001</b></li> <li>• HC - SUDs:<br/>c = -2.73, t(383) = -5.48, <b>p &lt; 0.001</b></li> <li>• DEP/ANX - SUDs:<br/>c = -1.26, t(383) = -3.22, <b>p = 0.001</b></li> </ul> | <p>F(2, 383) = 3.37<br/><b>p = 0.036</b></p> <p>Betas [CI]</p> <ul style="list-style-type: none"> <li>• DEP/ANX*WRAT:<br/>-0.1 [-0.23, 0.03], p = 0.147</li> <li>• SUDs*WRAT:<br/>0.04 [-0.09, 0.17], p = 0.594</li> </ul> <p>Post-hoc Contrasts</p> <ul style="list-style-type: none"> <li>• HC - DEP/ANX:<br/>c = 0.10, t(383) = 1.45, p = 0.147</li> <li>• HC - SUDs:<br/>c = -0.04, t(383) = -0.53, p = 0.594</li> <li>• DEP/ANX - SUDs:<br/>c = -0.13, t(383) = -2.56, <b>p = 0.011</b></li> </ul> |
| Standard Deviation (SD)<br>Runway Position | Age*Group                                                                                                                                                                                                           | Group*Sex                                                                                                                                                                                                                                                                                                                                                                                                                                                                                                                                                                                                                                                                                                                                                                                                  | GROUP*WRAT                                                                                                                                                                                                                                                                                                                                                                                                                                                                                              |
| Overall                                    | <p>F(2, 383) = 2.4<br/>p = 0.092</p> <p>Betas [CI]</p> <ul style="list-style-type: none"> <li>• Age*DEP/ANX:<br/>0.02 [-0.01, 0.05], p = 0.126</li> <li>• Age*SUDs:<br/>0.04 [0, 0.08], <b>p = 0.032</b></li> </ul> | <p>F(2, 383) = 2.84<br/>p = 0.06</p> <p>Betas [CI]</p> <ul style="list-style-type: none"> <li>• DEP/ANX*Sex:<br/>0.11 [-0.23, 0.44], p = 0.526</li> <li>• SUDs*Sex:<br/>0.46 [0.06, 0.85], <b>p = 0.023</b></li> </ul>                                                                                                                                                                                                                                                                                                                                                                                                                                                                                                                                                                                     | <p>F(2, 383) = 0.91<br/>p = 0.402</p> <p>Betas [CI]</p> <ul style="list-style-type: none"> <li>• DEP/ANX*WRAT:<br/>0.03 [-0.03, 0.09], p = 0.333</li> <li>• SUDs*WRAT:<br/>0 [-0.06, 0.06], p = 0.998</li> </ul>                                                                                                                                                                                                                                                                                        |

Appendix 1 to Smith R, Lavalley CA, Taylor S, et al. Elevated decision uncertainty and reduced avoidance drives in depression, anxiety and substance use disorders during approach–avoidance conflict: a replication study. *J Psychiatry Neurosci* 2023. doi: 10.1503/jpn.220226. Copyright © 2023 The Author(s) or their employer(s). To receive this resource in an accessible format, please contact us at cmajgroup@cmaj.ca. Online appendices are unedited and posted as supplied by the authors.

|     |                                                                                                                                                                                                                   |                                                                                                                                                                                                                    |                                                                                                                                                                                                                     |
|-----|-------------------------------------------------------------------------------------------------------------------------------------------------------------------------------------------------------------------|--------------------------------------------------------------------------------------------------------------------------------------------------------------------------------------------------------------------|---------------------------------------------------------------------------------------------------------------------------------------------------------------------------------------------------------------------|
| AV  | <p>F(2, 383) = 1.19<br/>p = 0.307</p> <p>Betas [CI]</p> <ul style="list-style-type: none"> <li>• Age*DEP/ANX:<br/>0.01 [-0.02, 0.04], p = 0.514</li> <li>• Age*SUDs:<br/>0.03 [-0.01, 0.06], p = 0.129</li> </ul> | <p>F(2, 383) = 0.19<br/>p = 0.823</p> <p>Betas [CI]</p> <ul style="list-style-type: none"> <li>• DEP/ANX*Sex:<br/>-0.08 [-0.4, 0.24], p = 0.622</li> <li>• SUDs*Sex:<br/>-0.11 [-0.49, 0.26], p = 0.558</li> </ul> | <p>F(2, 383) = 0.12<br/>p = 0.883</p> <p>Betas [CI]</p> <ul style="list-style-type: none"> <li>• DEP/ANX*WRAT:<br/>0.01 [-0.05, 0.06], p = 0.842</li> <li>• SUDs*WRAT:<br/>0.01 [-0.04, 0.07], p = 0.641</li> </ul> |
| APP | <p>F(2, 383) = 2.06<br/>p = 0.129</p> <p>Betas [CI]</p> <ul style="list-style-type: none"> <li>• Age*DEP/ANX:<br/>0.03 [0, 0.06], p = 0.055</li> <li>• Age*SUDs:<br/>0.03 [-0.01, 0.06], p = 0.11</li> </ul>      | <p>F(2, 383) = 0.17<br/>p = 0.847</p> <p>Betas [CI]</p> <ul style="list-style-type: none"> <li>• DEP/ANX*Sex:<br/>-0.09 [-0.4, 0.22], p = 0.566</li> <li>• SUDs*Sex:<br/>-0.05 [-0.41, 0.31], p = 0.794</li> </ul> | <p>F(2, 383) = 0.6<br/>p = 0.547</p> <p>Betas [CI]</p> <ul style="list-style-type: none"> <li>• DEP/ANX*WRAT:<br/>0.03 [-0.03, 0.08], p = 0.376</li> <li>• SUDs*WRAT:<br/>0.03 [-0.02, 0.09], p = 0.279</li> </ul>  |



Appendix 1 to Smith R, Lavalley CA, Taylor S, et al. Elevated decision uncertainty and reduced avoidance drives in depression, anxiety and substance use disorders during approach–avoidance conflict: a replication study. *J Psychiatry Neurosci* 2023. doi: 10.1503/jpn.220226. Copyright © 2023 The Author(s) or their employer(s). To receive this resource in an accessible format, please contact us at cmajgroup@cmaj.ca. Online appendices are unedited and posted as supplied by the authors.

|       |                                                                                                                                                                                                                                                                                                                                                                                                                                                                                                               |                                                                                                                                                                                                                      |                                                                                                                                                                                                                     |
|-------|---------------------------------------------------------------------------------------------------------------------------------------------------------------------------------------------------------------------------------------------------------------------------------------------------------------------------------------------------------------------------------------------------------------------------------------------------------------------------------------------------------------|----------------------------------------------------------------------------------------------------------------------------------------------------------------------------------------------------------------------|---------------------------------------------------------------------------------------------------------------------------------------------------------------------------------------------------------------------|
| CONF2 | <p>F(2, 383) = 4.75<br/>p = <b>0.009</b></p> <p>Betas [CI]</p> <ul style="list-style-type: none"> <li>• Age*DEP/ANX:<br/>0.02 [-0.02, 0.05], p = 0.332</li> <li>• Age*SUDs:<br/>0.06 [0.02, 0.09], p = <b>0.003</b></li> </ul> <p>Post-hoc Contrasts</p> <ul style="list-style-type: none"> <li>• HC - DEP/ANX:<br/>c = -0.02, t(383) = -0.97, p = 0.332</li> <li>• HC - SUDs:<br/>c = -0.06, t(383) = -2.97, p = 0.003</li> <li>• DEP/ANX - SUDs:<br/>c = -0.04, t(383) = -2.47, p = <b>0.014</b></li> </ul> | <p>F(2, 383) = 1.56<br/>p = 0.212</p> <p>Betas [CI]</p> <ul style="list-style-type: none"> <li>• DEP/ANX*Sex:<br/>-0.12 [-0.45, 0.22], p = 0.497</li> <li>• SUDs*Sex:<br/>0.2 [-0.19, 0.59], p = 0.31</li> </ul>     | <p>F(2, 383) = 0.72<br/>p = 0.485</p> <p>Betas [CI]</p> <ul style="list-style-type: none"> <li>• DEP/ANX*WRAT:<br/>0.04 [-0.02, 0.1], p = 0.234</li> <li>• SUDs*WRAT:<br/>0.02 [-0.04, 0.08], p = 0.479</li> </ul>  |
| CONF4 | <p>F(2, 383) = 2.28<br/>p = 0.103</p> <p>Betas [CI]</p> <ul style="list-style-type: none"> <li>• Age*DEP/ANX:<br/>0.01 [-0.02, 0.04], p = 0.369</li> <li>• Age*SUDs:<br/>0.04 [0, 0.08], p = <b>0.035</b></li> </ul>                                                                                                                                                                                                                                                                                          | <p>F(2, 383) = 2.71<br/>p = 0.068</p> <p>Betas [CI]</p> <ul style="list-style-type: none"> <li>• DEP/ANX*Sex:<br/>-0.08 [-0.42, 0.26], p = 0.632</li> <li>• SUDs*Sex:<br/>0.34 [-0.06, 0.73], p = 0.096</li> </ul>   | <p>F(2, 383) = 1.99<br/>p = 0.138</p> <p>Betas [CI]</p> <ul style="list-style-type: none"> <li>• DEP/ANX*WRAT:<br/>0.06 [0, 0.12], p = 0.058</li> <li>• SUDs*WRAT:<br/>0.03 [-0.03, 0.09], p = 0.373</li> </ul>     |
| CONF6 | <p>F(2, 383) = 2.21<br/>p = 0.112</p> <p>Betas [CI]</p> <ul style="list-style-type: none"> <li>• Age*DEP/ANX:<br/>0.01 [-0.02, 0.04], p = 0.354</li> <li>• Age*SUDs:<br/>0.04 [0, 0.08], p = <b>0.038</b></li> </ul>                                                                                                                                                                                                                                                                                          | <p>F(2, 383) = 2.6<br/>p = 0.076</p> <p>Betas [CI]</p> <ul style="list-style-type: none"> <li>• DEP/ANX*Sex:<br/>0.1 [-0.23, 0.44], p = 0.544</li> <li>• SUDs*Sex:<br/>0.44 [0.04, 0.83], p = <b>0.03</b></li> </ul> | <p>F(2, 383) = 1.53<br/>p = 0.218</p> <p>Betas [CI]</p> <ul style="list-style-type: none"> <li>• DEP/ANX*WRAT:<br/>0.05 [-0.01, 0.12], p = 0.083</li> <li>• SUDs*WRAT:<br/>0.03 [-0.03, 0.09], p = 0.291</li> </ul> |

Appendix 1 to Smith R, Lavalley CA, Taylor S, et al. Elevated decision uncertainty and reduced avoidance drives in depression, anxiety and substance use disorders during approach–avoidance conflict: a replication study. *J Psychiatry Neurosci* 2023. doi: 10.1503/jpn.220226. Copyright © 2023 The Author(s) or their employer(s). To receive this resource in an accessible format, please contact us at cmajgroup@cmaj.ca. Online appendices are unedited and posted as supplied by the authors.

| Response time | Age*Group                                                                                                                                                                                          | Group*Sex                                                                                                                                                                                                                                                                                                                                                                                                                                                                                                                                                                                                                                                                                                                                                        | GROUP*WRAT                                                                                                                                                                                                                                                                                                                                                                                                                                                                                               |
|---------------|----------------------------------------------------------------------------------------------------------------------------------------------------------------------------------------------------|------------------------------------------------------------------------------------------------------------------------------------------------------------------------------------------------------------------------------------------------------------------------------------------------------------------------------------------------------------------------------------------------------------------------------------------------------------------------------------------------------------------------------------------------------------------------------------------------------------------------------------------------------------------------------------------------------------------------------------------------------------------|----------------------------------------------------------------------------------------------------------------------------------------------------------------------------------------------------------------------------------------------------------------------------------------------------------------------------------------------------------------------------------------------------------------------------------------------------------------------------------------------------------|
| Overall       | <p>F(2, 382) = 1.05<br/>p = 0.351</p> <p>Betas [CI]</p> <ul style="list-style-type: none"> <li>Age*DEP/ANX:<br/>0 [0, 0.01], p = 0.276</li> <li>Age*SUDs:<br/>0.01 [0, 0.01], p = 0.162</li> </ul> | <p>F(2, 382) = 3.56<br/><b>p = 0.029</b></p> <p>Betas [CI]</p> <ul style="list-style-type: none"> <li>DEP/ANX*Sex:<br/>-0.1 [-0.18, -0.02], <b>p = 0.011</b></li> <li>SUDs*Sex:<br/>-0.03 [-0.12, 0.06], p = 0.49</li> </ul> <p>Post-hoc Contrasts</p> <p>Male:</p> <ul style="list-style-type: none"> <li>HC - DEP/ANX:<br/>c = 0.18, t(382) = 2.66, <b>p = 0.008</b></li> <li>HC - SUDs:<br/>c = 0.04, t(382) = 0.50, p = 0.615</li> <li>DEP/ANX - SUDs:<br/>c = -0.14, t(382) = -1.88, p = 0.061</li> </ul> <p>Female:</p> <ul style="list-style-type: none"> <li>HC - DEP/ANX:<br/>c = -0.03, t(382) = -0.52, p = 0.595</li> <li>HC - SUDs:<br/>c = -0.02, t(382) = -0.47, p = 0.642</li> <li>DEP/ANX - SUDs:<br/>c = 0, t(382) = 0.02, p = 0.985</li> </ul> | <p>F(2, 382) = 3.52<br/><b>p = 0.031</b></p> <p>Betas [CI]</p> <ul style="list-style-type: none"> <li>DEP/ANX*WRAT:<br/>0.02 [0, 0.03], <b>p = 0.019</b></li> <li>SUDs*WRAT:<br/>0.01 [-0.01, 0.02], p = 0.448</li> </ul> <p>Post-hoc Contrasts</p> <ul style="list-style-type: none"> <li>HC - DEP/ANX:<br/>c = -0.02, t(382) = -2.36, <b>p = 0.019</b></li> <li>HC - SUDs:<br/>c = -0.01, t(382) = -0.576, p = 0.448</li> <li>DEP/ANX - SUDs:<br/>c = 0.01, t(382) = 2.08, <b>p = 0.038</b></li> </ul> |

Appendix 1 to Smith R, Lavalley CA, Taylor S, et al. Elevated decision uncertainty and reduced avoidance drives in depression, anxiety and substance use disorders during approach–avoidance conflict: a replication study. *J Psychiatry Neurosci* 2023. doi: 10.1503/jpn.220226. Copyright © 2023 The Author(s) or their employer(s). To receive this resource in an accessible format, please contact us at cmajgroup@cmaj.ca. Online appendices are unedited and posted as supplied by the authors.

|     |                                                                                                                                                                                                            |                                                                                                                                                                                                                                                                                                                                                                                                                                                                                                                                                                                                                                                                                                                                                                                                                                      |                                                                                                                                                                                                                  |
|-----|------------------------------------------------------------------------------------------------------------------------------------------------------------------------------------------------------------|--------------------------------------------------------------------------------------------------------------------------------------------------------------------------------------------------------------------------------------------------------------------------------------------------------------------------------------------------------------------------------------------------------------------------------------------------------------------------------------------------------------------------------------------------------------------------------------------------------------------------------------------------------------------------------------------------------------------------------------------------------------------------------------------------------------------------------------|------------------------------------------------------------------------------------------------------------------------------------------------------------------------------------------------------------------|
| AV  | <p>F(2, 381) = 0.42<br/>p = 0.657</p> <p>Betas [CI]</p> <ul style="list-style-type: none"> <li>• Age*DEP/ANX:<br/>0 [0, 0.01], p = 0.47</li> <li>• Age*SUDs:<br/>0 [-0.01, 0.01], p = 0.384</li> </ul>     | <p>F(2, 381) = 7.27<br/><b>p &lt; 0.001</b></p> <p>Betas [CI]</p> <ul style="list-style-type: none"> <li>• DEP/ANX*Sex:<br/>-0.16 [-0.24, -0.07], <b>p &lt; 0.001</b></li> <li>• SUDs*Sex:<br/>-0.14 [-0.24, -0.04], <b>p = 0.005</b></li> </ul> <p>Post-hoc Contrasts</p> <p>Male:</p> <ul style="list-style-type: none"> <li>• HC - DEP/ANX:<br/>c = 0.20, t(381) = 2.68, <b>p = 0.008</b></li> <li>• HC - SUDs:<br/>c = 0.03, t(381) = 0.31, p = 0.760</li> <li>• DEP/ANX - SUDs:<br/>c = -0.17, t(381) = -2.12, <b>p = 0.035</b></li> </ul> <p>Female:</p> <ul style="list-style-type: none"> <li>• HC - DEP/ANX:<br/>c = -0.12, t(381) = -2.34, <b>p = 0.020</b></li> <li>• HC - SUDs:<br/>c = -0.26, t(381) = -4.50, <b>p &lt; 0.001</b></li> <li>• DEP/ANX - SUDs:<br/>c = -0.14, t(381) = -3.04, <b>p = 0.003</b></li> </ul> | <p>F(2, 381) = 1.02<br/>p = 0.363</p> <p>Betas [CI]</p> <ul style="list-style-type: none"> <li>• DEP/ANX*WRAT:<br/>0.01 [-0.01, 0.03], p = 0.203</li> <li>• SUDs*WRAT:<br/>0 [-0.01, 0.02], p = 0.672</li> </ul> |
| APP | <p>F(2, 382) = 1.02<br/>p = 0.363</p> <p>Betas [CI]</p> <ul style="list-style-type: none"> <li>• Age*DEP/ANX:<br/>0.01 [0, 0.01], p = 0.174</li> <li>• Age*SUDs:<br/>0 [-0.01, 0.01], p = 0.684</li> </ul> | <p>F(2, 382) = 2.2<br/>p = 0.112</p> <p>Betas [CI]</p> <ul style="list-style-type: none"> <li>• DEP/ANX*Sex:<br/>-0.09 [-0.18, 0], p = 0.06</li> <li>• SUDs*Sex:<br/>-0.01 [-0.12, 0.09], p = 0.818</li> </ul>                                                                                                                                                                                                                                                                                                                                                                                                                                                                                                                                                                                                                       | <p>F(2, 382) = 1.72<br/>p = 0.181</p> <p>Betas [CI]</p> <ul style="list-style-type: none"> <li>• DEP/ANX*WRAT:<br/>0.02 [0, 0.03], p = 0.073</li> <li>• SUDs*WRAT:<br/>0.01 [-0.01, 0.02], p = 0.352</li> </ul>  |

Appendix 1 to Smith R, Lavalley CA, Taylor S, et al. Elevated decision uncertainty and reduced avoidance drives in depression, anxiety and substance use disorders during approach–avoidance conflict: a replication study. *J Psychiatry Neurosci* 2023. doi: 10.1503/jpn.220226. Copyright © 2023 The Author(s) or their employer(s). To receive this resource in an accessible format, please contact us at cmajgroup@cmaj.ca. Online appendices are unedited and posted as supplied by the authors.

|              |                                                                                                                                                                                                           |                                                                                                                                                                                                                          |                                                                                                                                                                                                                                                                                                                                                                                                                                                                                              |
|--------------|-----------------------------------------------------------------------------------------------------------------------------------------------------------------------------------------------------------|--------------------------------------------------------------------------------------------------------------------------------------------------------------------------------------------------------------------------|----------------------------------------------------------------------------------------------------------------------------------------------------------------------------------------------------------------------------------------------------------------------------------------------------------------------------------------------------------------------------------------------------------------------------------------------------------------------------------------------|
| <p>CONF2</p> | <p>F(2, 382) = 1.97<br/>p = 0.14</p> <p>Betas [CI]</p> <ul style="list-style-type: none"> <li>• Age*DEP/ANX:<br/>0 [-0.01, 0.01], p = 0.569</li> <li>• Age*SUDs:<br/>0.01 [0, 0.02], p = 0.058</li> </ul> | <p>F(2, 382) = 2.68<br/>p = 0.07</p> <p>Betas [CI]</p> <ul style="list-style-type: none"> <li>• DEP/ANX*Sex:<br/>-0.1 [-0.19, -0.01], <b>p = 0.03</b></li> <li>• SUDs*Sex:<br/>-0.03 [-0.13, 0.08], p = 0.629</li> </ul> | <p>F(2, 382) = 3.51<br/><b>p = 0.031</b></p> <p>Betas [CI]</p> <ul style="list-style-type: none"> <li>• DEP/ANX*WRAT:<br/>0.01 [0, 0.03], p = 0.087</li> <li>• SUDs*WRAT:<br/>0 [-0.02, 0.01], p = 0.79</li> </ul> <p>Post-hoc Contrasts</p> <ul style="list-style-type: none"> <li>• HC - DEP/ANX:<br/>c = -0.01, t(382) = -1.71, p = 0.087</li> <li>• HC - SUDs:<br/>c = 0.0, t(382) = 0.27, p = 0.790</li> <li>• DEP/ANX - SUDs:<br/>c = 0.02, t(382) = 2.55, <b>p = 0.011</b></li> </ul> |
|--------------|-----------------------------------------------------------------------------------------------------------------------------------------------------------------------------------------------------------|--------------------------------------------------------------------------------------------------------------------------------------------------------------------------------------------------------------------------|----------------------------------------------------------------------------------------------------------------------------------------------------------------------------------------------------------------------------------------------------------------------------------------------------------------------------------------------------------------------------------------------------------------------------------------------------------------------------------------------|

Appendix 1 to Smith R, Lavalley CA, Taylor S, et al. Elevated decision uncertainty and reduced avoidance drives in depression, anxiety and substance use disorders during approach–avoidance conflict: a replication study. *J Psychiatry Neurosci* 2023. doi: 10.1503/jpn.220226. Copyright © 2023 The Author(s) or their employer(s). To receive this resource in an accessible format, please contact us at cmajgroup@cmaj.ca. Online appendices are unedited and posted as supplied by the authors.

|              |                                                                                                                                                                                                          |                                                                                                                                                                                                                                                                                                                                                                                                                                                                                                                                                                                                                                                                                                                                                                                 |                                                                                                                                                                                                                                                                                                                                                                                                                                                                                                                   |
|--------------|----------------------------------------------------------------------------------------------------------------------------------------------------------------------------------------------------------|---------------------------------------------------------------------------------------------------------------------------------------------------------------------------------------------------------------------------------------------------------------------------------------------------------------------------------------------------------------------------------------------------------------------------------------------------------------------------------------------------------------------------------------------------------------------------------------------------------------------------------------------------------------------------------------------------------------------------------------------------------------------------------|-------------------------------------------------------------------------------------------------------------------------------------------------------------------------------------------------------------------------------------------------------------------------------------------------------------------------------------------------------------------------------------------------------------------------------------------------------------------------------------------------------------------|
| <p>CONF4</p> | <p>F(2, 382) = 1.14<br/>p = 0.32</p> <p>Betas [CI]</p> <ul style="list-style-type: none"> <li>• Age*DEP/ANX:<br/>0.01 [0, 0.01], p = 0.179</li> <li>• Age*SUDs:<br/>0.01 [0, 0.02], p = 0.188</li> </ul> | <p>F(2, 382) = 4.02<br/><b>p = 0.019</b></p> <p>Betas [CI]</p> <ul style="list-style-type: none"> <li>• DEP/ANX*Sex:<br/>-0.1 [-0.2, -0.01], <b>p = 0.028</b></li> <li>• SUDs*Sex:<br/>0.02 [-0.09, 0.13], p = 0.739</li> </ul> <p>Post-hoc Contrasts</p> <p>Male:</p> <ul style="list-style-type: none"> <li>• HC - DEP/ANX:<br/>c = 0.20, t(382) = 2.56, <b>p = 0.011</b></li> <li>• HC - SUDs:<br/>c = 0.09, t(382) = 0.98, p = 0.327</li> <li>• DEP/ANX - SUDs:<br/>c = -0.11, t(382) = -1.28, p = 0.202</li> </ul> <p>Female:</p> <ul style="list-style-type: none"> <li>• HC - DEP/ANX:<br/>c = -0.0, t(382) = -0.05, p = 0.961</li> <li>• HC - SUDs:<br/>c = 0.04, t(382) = 0.60, p = 0.549</li> <li>• DEP/ANX - SUDs:<br/>c = 0.04, t(382) = 0.82, p = 0.415</li> </ul> | <p>F(2, 382) = 3.67<br/><b>p = 0.026</b></p> <p>Betas [CI]</p> <ul style="list-style-type: none"> <li>• DEP/ANX*WRAT:<br/>0.02 [0, 0.04], <b>p = 0.015</b></li> <li>• SUDs*WRAT:<br/>0.01 [-0.01, 0.02], p = 0.383</li> </ul> <p>Post-hoc Contrasts</p> <ul style="list-style-type: none"> <li>• HC - DEP/ANX:<br/>c = -0.02, t(382) = -2.45, <b>p = 0.015</b></li> <li>• HC - SUDs:<br/>c = -0.01, t(382) = -0.87, p = 0.383</li> <li>• DEP/ANX - SUDs:<br/>c = 0.01, t(382) = 2.06, <b>p = 0.040</b></li> </ul> |
|--------------|----------------------------------------------------------------------------------------------------------------------------------------------------------------------------------------------------------|---------------------------------------------------------------------------------------------------------------------------------------------------------------------------------------------------------------------------------------------------------------------------------------------------------------------------------------------------------------------------------------------------------------------------------------------------------------------------------------------------------------------------------------------------------------------------------------------------------------------------------------------------------------------------------------------------------------------------------------------------------------------------------|-------------------------------------------------------------------------------------------------------------------------------------------------------------------------------------------------------------------------------------------------------------------------------------------------------------------------------------------------------------------------------------------------------------------------------------------------------------------------------------------------------------------|

Appendix 1 to Smith R, Lavalley CA, Taylor S, et al. Elevated decision uncertainty and reduced avoidance drives in depression, anxiety and substance use disorders during approach–avoidance conflict: a replication study. *J Psychiatry Neurosci* 2023. doi: 10.1503/jpn.220226. Copyright © 2023 The Author(s) or their employer(s). To receive this resource in an accessible format, please contact us at cmajgroup@cmaj.ca. Online appendices are unedited and posted as supplied by the authors.

|       |                                                                                                                                                                                                            |                                                                                                                                                                                                                |                                                                                                                                                                                                                                                                                                                                                                                                                                                                                                           |
|-------|------------------------------------------------------------------------------------------------------------------------------------------------------------------------------------------------------------|----------------------------------------------------------------------------------------------------------------------------------------------------------------------------------------------------------------|-----------------------------------------------------------------------------------------------------------------------------------------------------------------------------------------------------------------------------------------------------------------------------------------------------------------------------------------------------------------------------------------------------------------------------------------------------------------------------------------------------------|
| CONF6 | <p>F(2, 382) = 0.93<br/>p = 0.396</p> <p>Betas [CI]</p> <ul style="list-style-type: none"> <li>• Age*DEP/ANX:<br/>0 [-0.01, 0.01], p = 0.614</li> <li>• Age*SUDs:<br/>0.01 [0, 0.02], p = 0.183</li> </ul> | <p>F(2, 382) = 0.94<br/>p = 0.392</p> <p>Betas [CI]</p> <ul style="list-style-type: none"> <li>• DEP/ANX*Sex:<br/>-0.06 [-0.15, 0.04], p = 0.235</li> <li>• SUDs*Sex:<br/>0 [-0.11, 0.1], p = 0.956</li> </ul> | <p>F(2, 382) = 3.87<br/><b>p = 0.022</b></p> <p>Betas [CI]</p> <ul style="list-style-type: none"> <li>• DEP/ANX*WRAT:<br/>0.02 [0.01, 0.04], <b>p = 0.006</b></li> <li>• SUDs*WRAT:<br/>0.01 [0, 0.03], p = 0.103</li> </ul> <p>Post-hoc Contrasts</p> <ul style="list-style-type: none"> <li>• HC - DEP/ANX:<br/>c = -0.02, t(382) = -2.76, <b>p = 0.006</b></li> <li>• HC - SUDs:<br/>c = -0.01, t(382) = -1.63, p = 0.103</li> <li>• DEP/ANX - SUDs:<br/>c = 0.01, t(382) = 1.49, p = 0.137</li> </ul> |
|-------|------------------------------------------------------------------------------------------------------------------------------------------------------------------------------------------------------------|----------------------------------------------------------------------------------------------------------------------------------------------------------------------------------------------------------------|-----------------------------------------------------------------------------------------------------------------------------------------------------------------------------------------------------------------------------------------------------------------------------------------------------------------------------------------------------------------------------------------------------------------------------------------------------------------------------------------------------------|
